# Supplementary material for: Morphological, Ecological, and Molecular Divergence of Conogethes pinicolalis from C. punctiferalis (Lepidoptera: Crambidae)
Source: MDPI journal article supplement (doi:10.3390/insects12050455), 2021-05-15
Supplement: s1 [file s1]

**Table S1.** List of *Conogethes pinicolalis* and *C. punctiferalis* samples sequenced for *COI* and *EF1α*

| Locality<br>(no. of individuals)                    | Collection date | Sample<br>animal number | <i>COI</i> haplotype<br>(658 bp) | GenBank no. | <i>EF1α</i> haplotype<br>(787 bp) | GenBank no. |
|-----------------------------------------------------|-----------------|-------------------------|----------------------------------|-------------|-----------------------------------|-------------|
| 1. Mt. Gyeongsan, Incheon<br>Metropolitan City (11) | 2016. 09. 27    | CNU7272                 | BARCPU01                         | MW315217    | EF1ACPU01                         | MW348773    |
|                                                     | 2016. 09. 27    | -                       | -                                | -           | EF1ACPU01                         | MW348773    |
|                                                     | 2016. 09. 27    | -                       | -                                | -           | EF1ACPU02                         | MW348774    |
|                                                     | 2016. 09. 27    | -                       | -                                | -           | EF1ACPU03                         | MW348775    |
|                                                     | 2016. 09. 27    | -                       | -                                | -           | EF1ACPU03                         | MW348775    |
|                                                     | 2018. 10. 12    | CNU8214                 | BARCPU13                         | MW315218    | EF1ACPU01                         | MW348776    |
|                                                     | 2018. 10. 12    | -                       | -                                | -           | EF1ACPU01                         | MW348776    |
|                                                     | 2018. 10. 12    | -                       | -                                | -           | EF1ACPU37                         | MW348777    |
|                                                     | 2018. 10. 12    | -                       | -                                | -           | EF1ACPU38                         | MW348778    |
|                                                     | 2018. 10. 12    | -                       | -                                | -           | PU5 <sup>+</sup>                  | MW348779    |
|                                                     | 2018. 10. 12    | CNU8208                 | BARCPU02                         | MW315219    | -                                 | -           |
|                                                     | 2018. 10. 12    | CNU8209                 | BARCPU02                         | MW315220    | -                                 | -           |
|                                                     | 2018. 10. 12    | CNU8210                 | BARCPU02                         | MW315221    | -                                 | -           |
|                                                     | 2018.10. 12     | CNU8211                 | BARCPU02                         | MW315222    | -                                 | -           |
|                                                     | 2018.10. 12     | CNU8212                 | BARCPU02                         | MW315223    | -                                 | -           |
|                                                     | 2018.10. 12     | CNU8213                 | BARCPU02                         | MW315224    | -                                 | -           |
|                                                     | 2018.10. 12     | CNU8215                 | BARCPU02                         | MW315225    | -                                 | -           |
|                                                     | 2018.10. 12     | CNU8216                 | BARCPU13                         | MW315226    | -                                 | -           |
|                                                     | 2018.10. 12     | CNU8217                 | BARCPU02                         | MW315227    | -                                 | -           |
| 2. Gapyeong, GG (1)                                 | 2018.10. 02     | CNU8219                 | BARCPU02                         | MW315228    | -                                 | -           |
| 3. Hongcheon, GW (1)                                | 2018. 07. 31    | CNU8203                 | BARCPU01                         | MW315229    | -                                 | -           |
| 4. Yangyang, GW (1)                                 | 2018. 09. 24    | CNU8218                 | BARCPU02                         | MW315230    | -                                 | -           |
| 5. Iksan, JB (1)                                    | 2018. 08. 08    | CNU8204                 | BARCPU11                         | MW315231    | EF1ACPU32                         | MW348780    |
|                                                     | 2018. 08. 08    | -                       | -                                | -           | EF1ACPU32                         | MW348780    |
|                                                     | 2018. 08. 08    | -                       | -                                | -           | EF1ACPU32                         | MW348780    |
|                                                     | 2018. 08. 08    | -                       | -                                | -           | EF1ACPU32                         | MW348780    |
|                                                     | 2018. 08. 08    | -                       | -                                | -           | EF1ACPU33                         | MW348781    |
| 6. Jeongeup, JB (14)                                | 2018. 07. 18    | CNU8185                 | BARCPU09                         | MW315232    | EF1ACPU24                         | MW348782    |
|                                                     | 2018. 07. 18    | -                       | -                                | -           | EF1ACPU25                         | MW348783    |
|                                                     | 2018. 07. 18    | -                       | -                                | -           | EF1ACPU26                         | MW348784    |
|                                                     | 2018. 07. 18    | -                       | -                                | -           | EF1ACPU27                         | MW348785    |
|                                                     | 2018. 07. 18    | -                       | -                                | -           | EF1ACPU28                         | MW348786    |
|                                                     | 2018. 07. 18    | CNU8189                 | BARCPU03                         | MW315233    | EF1ACPU06                         | MW348787    |
|                                                     | 2018. 07. 18    | -                       | -                                | -           | EF1ACPU07                         | MW348788    |
|                                                     | 2018. 07. 18    | -                       | -                                | -           | EF1ACPU08                         | MW348789    |
|                                                     | 2018. 07. 18    | -                       | -                                | -           | EF1ACPU09                         | MW348790    |
|                                                     | 2018. 07. 18    | -                       | -                                | -           | EF1ACPU09                         | MW348790    |
|                                                     | 2018. 07. 18    | -                       | -                                | -           | EF1ACPU11                         | MW348791    |
|                                                     | 2018. 07. 18    | -                       | -                                | -           | EF1ACPU21                         | MW348792    |
|                                                     | 2018. 07. 18    | -                       | -                                | -           | EF1ACPU21                         | MW348792    |
|                                                     | 2018. 07. 18    | -                       | -                                | -           | EF1ACPU47                         | MW348793    |
|                                                     | 2018. 07. 18    | -                       | -                                | -           | PU1 <sup>+</sup>                  | MW348794    |
|                                                     | 2018. 07. 18    | CNU8179                 | BARCPU01                         | MW315234    | -                                 | -           |
|                                                     | 2018. 07. 18    | CNU8180                 | BARCPU02                         | MW315235    | -                                 | -           |
|                                                     | 2018. 07. 18    | CNU8181                 | BARCPU03                         | MW315236    | -                                 | -           |
|                                                     | 2018. 07. 18    | CNU8182                 | BARCPU03                         | MW315237    | -                                 | -           |
|                                                     | 2018. 07. 18    | CNU8183                 | BARCPU02                         | MW315238    | -                                 | -           |
|                                                     | 2018. 07. 18    | CNU8184                 | BARCPU01                         | MW315239    | -                                 | -           |
|                                                     | 2018. 07. 18    | CNU8186                 | BARCPU01                         | MW315240    | -                                 | -           |
|                                                     | 2018. 07. 18    | CNU8187                 | BARCPU09                         | MW315241    | -                                 | -           |
|                                                     | 2018. 07. 18    | CNU8188                 | BARCPU09                         | MW315242    | -                                 | -           |
|                                                     | 2018. 07. 18    | CNU8191                 | BARCPU02                         | MW315243    | -                                 | -           |
|                                                     | 2018. 07. 18    | CNU8192                 | BARCPU02                         | MW315244    | -                                 | -           |
|                                                     | 2018. 07. 18    | CNU8194                 | BARCPU02                         | MW315245    | -                                 | -           |
| 7. Damyang, JN (1)                                  | 2018. 10. 15    | CNU8238                 | BARCPU02                         | MW315246    | -                                 | -           |
| 8. Gwangju Metropolitan City (40)                   | 2018. 05. 22    | CNU8202                 | BARCPU02                         | MW315247    | -                                 | -           |
|                                                     | 2019. 04. 20    | CNU10685                | BARCPI11                         | MW315248    | EF1ACPI30                         | MW348795    |
|                                                     | 2019. 04. 20    | -                       | -                                | -           | EF1ACPI30                         | MW348795    |
|                                                     | 2019. 04. 20    | -                       | -                                | -           | EF1ACPI30                         | MW348795    |
|                                                     | 2019. 04. 20    | -                       | -                                | -           | EF1ACPI31                         | MW348796    |
|                                                     | 2019. 04. 20    | -                       | -                                | -           | EF1ACPI31                         | MW348796    |
|                                                     | 2019. 04. 20    | CNU10689                | BARCPI01                         | MW315249    | EF1ACPI01                         | MW348797    |
|                                                     | 2019. 04. 20    | -                       | -                                | -           | EF1ACPI02                         | MW348798    |

|                                  |              |          |          |          |           |          |
|----------------------------------|--------------|----------|----------|----------|-----------|----------|
|                                  | 2019. 04. 20 | -        | -        | -        | EF1ACPI03 | MW348799 |
|                                  | 2019. 04. 20 | -        | -        | -        | EF1ACPI04 | MW348800 |
|                                  | 2019. 04. 20 | -        | -        | -        | EF1ACPI04 | MW348800 |
|                                  | 2019. 04. 20 | CNU10690 | BARCPI10 | MW315250 | EF1ACPI25 | MW348801 |
|                                  | 2019. 04. 20 | -        | -        | -        | EF1ACPI26 | MW348802 |
|                                  | 2019. 04. 20 | -        | -        | -        | EF1ACPI27 | MW348803 |
|                                  | 2019. 04. 20 | -        | -        | -        | EF1ACPI28 | MW348804 |
|                                  | 2019. 04. 20 | -        | -        | -        | EF1ACPI29 | MW348805 |
|                                  | 2019. 04. 20 | CNU10684 | BARCPI04 | MW315251 | -         | -        |
|                                  | 2019. 04. 20 | CNU10686 | BARCPI12 | MW315252 | -         | -        |
|                                  | 2019. 04. 20 | CNU10687 | BARCPI04 | MW315253 | -         | -        |
|                                  | 2019. 04. 20 | CNU10688 | BARCPI01 | MW315254 | -         | -        |
|                                  | 2019. 04. 20 | CNU10691 | BARCPI12 | MW315255 | -         | -        |
|                                  | 2019. 04. 20 | CNU10692 | BARCPI01 | MW315256 | -         | -        |
|                                  | 2019. 04. 20 | CNU10693 | BARCPI04 | MW315257 | -         | -        |
|                                  | 2019. 04. 20 | CNU10694 | BARCPI04 | MW315258 | -         | -        |
|                                  | 2019. 04. 20 | CNU10695 | BARCPI01 | MW315259 | -         | -        |
|                                  | 2019. 04. 20 | CNU10696 | BARCPI09 | MW315260 | -         | -        |
|                                  | 2019. 04. 20 | CNU10697 | BARCPI01 | MW315261 | -         | -        |
|                                  | 2019. 04. 20 | CNU10698 | BARCPI01 | MW315262 | -         | -        |
|                                  | 2019. 04. 20 | CNU10699 | BARCPI01 | MW315263 | -         | -        |
|                                  | 2019. 04. 20 | CNU10700 | BARCPI09 | MW315264 | -         | -        |
|                                  | 2019. 04. 20 | CNU10701 | BARCPI01 | MW315265 | -         | -        |
|                                  | 2019. 05. 01 | CNU10702 | BARCPI01 | MW315266 | -         | -        |
|                                  | 2019. 05. 01 | CNU11057 | BARCPI01 | MW315267 | -         | -        |
|                                  | 2019. 05. 01 | CNU11058 | BARCPI01 | MW315268 | -         | -        |
|                                  | 2019. 05. 01 | CNU11059 | BARCPI04 | MW315269 | -         | -        |
|                                  | 2019. 05. 01 | CNU11060 | BARCPI01 | MW315270 | -         | -        |
|                                  | 2019. 04. 20 | CNU11061 | BARCPI01 | MW315271 | -         | -        |
|                                  | 2019. 04. 20 | CNU11062 | BARCPI09 | MW315272 | -         | -        |
|                                  | 2019. 04. 20 | CNU11063 | BARCPI04 | MW315273 | -         | -        |
|                                  | 2019. 04. 20 | CNU11064 | BARCPI01 | MW315274 | -         | -        |
|                                  | 2019. 04. 20 | CNU11065 | BARCPI01 | MW315275 | -         | -        |
|                                  | 2019. 04. 20 | CNU11066 | BARCPI01 | MW315276 | -         | -        |
|                                  | 2019. 04. 20 | CNU11067 | BARCPI03 | MW315277 | -         | -        |
|                                  | 2019. 04. 20 | CNU11068 | BARCPI04 | MW315278 | -         | -        |
|                                  | 2019. 04. 20 | CNU11069 | BARCPI04 | MW315279 | -         | -        |
|                                  | 2019. 04. 20 | CNU11070 | BARCPI04 | MW315280 | -         | -        |
|                                  | 2019. 04. 20 | CNU11071 | BARCPI04 | MW315281 | -         | -        |
|                                  | 2019. 04. 20 | CNU11072 | BARCPI05 | MW315282 | -         | -        |
|                                  | 2019. 04. 20 | CNU11073 | BARCPI01 | MW315283 | -         | -        |
|                                  | 2019. 04. 20 | CNU11074 | BARCPI04 | MW315284 | -         | -        |
|                                  | 2019. 04. 20 | CNU11075 | BARCPI12 | MW315285 | -         | -        |
|                                  | 2019. 04. 20 | CNU11076 | BARCPI09 | MW315286 | -         | -        |
| 9. Mt. Seungdalsan, Muan; JN (2) | 2018. 08. 19 | CNU8482  | BARCPI04 | MW315287 | EF1ACPI10 | MW348806 |
|                                  | 2018. 08. 19 | -        | -        | -        | EF1ACPI10 | MW348806 |
|                                  | 2018. 08. 19 | -        | -        | -        | EF1ACPI12 | MW348807 |
|                                  | 2018. 08. 19 | -        | -        | -        | EF1ACPI12 | MW348807 |
|                                  | 2018. 08. 19 | -        | -        | -        | EF1ACPI12 | MW348807 |
|                                  | 2018. 08. 19 | -        | -        | -        | EF1ACPI12 | MW348807 |
|                                  | 2018. 08. 19 | -        | -        | -        | EF1ACPI13 | MW348808 |
|                                  | 2018. 08. 19 | -        | -        | -        | EF1ACPI35 | MW348809 |
|                                  | 2018. 08. 19 | -        | -        | -        | EF1ACPI36 | MW348810 |
|                                  | 2018. 08. 19 | -        | -        | -        | EF1ACPI37 | MW348811 |
| 10. Gangjin, JN (11)             | 2018. 08. 19 | CNU8483  | BARCPI05 | MW315288 | -         | -        |
|                                  | 2018. 10. 18 | CNU8240  | BARCPU02 | MW315289 | EF1ACPU01 | MW348812 |
|                                  | 2018. 10. 18 | -        | -        | -        | EF1ACPU01 | MW348812 |
|                                  | 2018. 10. 18 | -        | -        | -        | EF1ACPU01 | MW348812 |
|                                  | 2018. 10. 18 | -        | -        | -        | EF1ACPU04 | MW348813 |
|                                  | 2018. 10. 18 | -        | -        | -        | EF1ACPU05 | MW348814 |
|                                  | 2018. 10. 18 | CNU8239  | BARCPU13 | MW315290 | -         | -        |
|                                  | 2018. 10. 18 | CNU8241  | BARCPU13 | MW315291 | -         | -        |
|                                  | 2018. 10. 18 | CNU8242  | BARCPU02 | MW315292 | -         | -        |
|                                  | 2018. 10. 18 | CNU8243  | BARCPU02 | MW315293 | -         | -        |
|                                  | 2018. 10. 18 | CNU8244  | BARCPU13 | MW315294 | -         | -        |
|                                  | 2018. 10. 18 | CNU8245  | BARCPU02 | MW315295 | -         | -        |
|                                  | 2018. 10. 18 | CNU8246  | BARCPU02 | MW315296 | -         | -        |

|                       |              |         |          |          |                  |          |
|-----------------------|--------------|---------|----------|----------|------------------|----------|
|                       | 2018. 10. 18 | CNU8247 | BARCPU02 | MW315297 | -                | -        |
|                       | 2018. 10. 18 | CNU8248 | BARCPU02 | MW315298 | -                | -        |
|                       | 2018. 10. 18 | CNU8249 | BARCPU02 | MW315299 | -                | -        |
| 11. Boseong, JN (14)  | 2018. 06. 28 | CNU8160 | BARCPU01 | MW315300 | -                | -        |
|                       | 2018. 06. 28 | CNU8161 | BARCPU04 | MW315301 | EF1ACPU10        | MW348815 |
|                       | 2018. 06. 28 | -       | -        | -        | EF1ACPU10        | MW348815 |
|                       | 2018. 06. 28 | -       | -        | -        | EF1ACPU10        | MW348815 |
|                       | 2018. 06. 28 | -       | -        | -        | EF1ACPU12        | MW348816 |
|                       | 2018. 06. 28 | -       | -        | -        | EF1ACPU48        | MW348817 |
|                       | 2018. 06. 28 | -       | -        | -        | EF1ACPU49        | MW348818 |
|                       | 2018. 06. 28 | -       | -        | -        | EF1ACPU50        | MW348819 |
|                       | 2018. 06. 28 | -       | -        | -        | EF1ACPU51        | MW348820 |
|                       | 2018. 06. 28 | -       | -        | -        | EF1ACPU52        | MW348821 |
|                       | 2018. 06. 28 | -       | -        | -        | EF1ACPU53        | MW348822 |
|                       | 2018. 06. 28 | CNU8254 | BARCPU05 | MW315302 | EF1ACPU01        | MW348823 |
|                       | 2018. 06. 28 | -       | -        | -        | EF1ACPU13        | MW348824 |
|                       | 2018. 06. 28 | -       | -        | -        | EF1ACPU14        | MW348825 |
|                       | 2018. 06. 28 | -       | -        | -        | EF1ACPU15        | MW348826 |
|                       | 2018. 06. 28 | -       | -        | -        | PU2 <sup>†</sup> | MW348827 |
|                       | 2018. 06. 28 | CNU8162 | BARCPU02 | MW315303 | -                | -        |
|                       | 2018. 06. 28 | CNU8163 | BARCPU03 | MW315304 | -                | -        |
|                       | 2018. 06. 28 | CNU8166 | BARCPU02 | MW315305 | -                | -        |
|                       | 2018. 06. 28 | CNU8167 | BARCPU02 | MW315306 | -                | -        |
|                       | 2018. 06. 28 | CNU8168 | BARCPU02 | MW315307 | -                | -        |
|                       | 2018. 06. 28 | CNU8169 | BARCPU01 | MW315308 | -                | -        |
|                       | 2018. 06. 28 | CNU8170 | BARCPU05 | MW315309 | -                | -        |
|                       | 2018. 06. 28 | CNU8250 | BARCPU02 | MW315310 | -                | -        |
|                       | 2018. 06. 28 | CNU8251 | BARCPU02 | MW315311 | -                | -        |
|                       | 2018. 06. 28 | CNU8252 | BARCPU02 | MW315312 | -                | -        |
|                       | 2018. 06. 28 | CNU8253 | BARCPU01 | MW315313 | -                | -        |
| 12. Suncheon, JN (38) | 2018. 06. 08 | CNU8195 | BARCPU10 | MW315314 | EF1ACPU29        | MW348828 |
|                       | 2018. 06. 08 | -       | -        | -        | EF1ACPU30        | MW348829 |
|                       | 2018. 06. 08 | -       | -        | -        | EF1ACPU30        | MW348829 |
|                       | 2018. 06. 08 | -       | -        | -        | EF1ACPU31        | MW348830 |
|                       | 2018. 06. 08 | -       | -        | -        | EF1ACPU31        | MW348830 |
|                       | 2018. 10. 03 | CNU8229 | BARCPU14 | MW315315 | EF1ACPU39        | MW348831 |
|                       | 2018. 10. 03 | -       | -        | -        | EF1ACPU40        | MW348832 |
|                       | 2018. 10. 03 | -       | -        | -        | EF1ACPU41        | MW348833 |
|                       | 2018. 10. 03 | -       | -        | -        | EF1ACPU42        | MW348834 |
|                       | 2018. 10. 03 | -       | -        | -        | PU6 <sup>†</sup> | MW348835 |
|                       | 2018. 10. 03 | CNU8230 | BARCPU15 | MW315316 | EF1ACPU43        | MW348836 |
|                       | 2018. 10. 03 | -       | -        | -        | EF1ACPU44        | MW348837 |
|                       | 2018. 10. 03 | -       | -        | -        | EF1ACPU45        | MW348838 |
|                       | 2018. 10. 03 | -       | -        | -        | EF1ACPU46        | MW348839 |
|                       | 2018. 10. 03 | -       | -        | -        | PU7 <sup>†</sup> | MW348840 |
|                       | 2012. 06. 20 | CP4545  | BARCPU01 | MW315317 | -                | -        |
|                       | 2012. 06. 20 | CP4546  | BARCPU01 | MW315318 | -                | -        |
|                       | 2012. 06. 20 | CP4547  | BARCPU01 | MW315319 | -                | -        |
|                       | 2012. 06. 20 | CP4548  | BARCPU01 | MW315320 | -                | -        |
|                       | 2012. 06. 20 | CP4549  | BARCPU02 | MW315321 | -                | -        |
|                       | 2012. 06. 20 | CP4550  | BARCPU01 | MW315322 | -                | -        |
|                       | 2012. 06. 20 | CP4556  | BARCPU02 | MW315323 | -                | -        |
|                       | 2012. 06. 20 | CP4557  | BARCPU01 | MW315324 | -                | -        |
|                       | 2012. 06. 20 | CP4558  | BARCPU01 | MW315325 | -                | -        |
|                       | 2012. 06. 20 | CP4559  | BARCPU03 | MW315326 | -                | -        |
|                       | 2012. 06. 20 | CP4560  | BARCPU02 | MW315327 | -                | -        |
|                       | 2012. 06. 20 | CP4561  | BARCPU02 | MW315328 | -                | -        |
|                       | 2018. 06. 08 | CNU8200 | BARCPU01 | MW315329 | -                | -        |
|                       | 2018. 06. 13 | CNU8201 | BARCPU02 | MW315330 | -                | -        |
|                       | 2018. 10. 03 | CNU8225 | BARCPU02 | MW315331 | -                | -        |
|                       | 2018. 10. 03 | CNU8226 | BARCPU02 | MW315332 | -                | -        |
|                       | 2018. 10. 03 | CNU8227 | BARCPU02 | MW315333 | -                | -        |
|                       | 2018. 10. 03 | CNU8228 | BARCPU02 | MW315334 | -                | -        |
|                       | 2018. 10. 03 | CNU8231 | BARCPU02 | MW315335 | -                | -        |
|                       | 2018. 10. 03 | CNU8232 | BARCPU02 | MW315336 | -                | -        |
|                       | 2018. 10. 03 | CNU8233 | BARCPU02 | MW315337 | -                | -        |

|                                    |              |          |          |          |                  |          |
|------------------------------------|--------------|----------|----------|----------|------------------|----------|
|                                    | 2018. 10. 03 | CNU8234  | BARCPU15 | MW315338 | -                | -        |
|                                    | 2018. 10. 03 | CNU8235  | BARCPU02 | MW315339 | -                | -        |
|                                    | 2018. 06. 08 | CNU8197  | BARCPI06 | MW315340 | EF1ACPI12        | MW348841 |
|                                    | 2018. 06. 08 | -        | -        | -        | EF1ACPI12        | MW348841 |
|                                    | 2018. 06. 08 | -        | -        | -        | EF1ACPI12        | MW348841 |
|                                    | 2018. 06. 08 | -        | -        | -        | EF1ACPI12        | MW348841 |
|                                    | 2018. 06. 08 | -        | -        | -        | EF1ACPI16        | MW348842 |
|                                    | 2019. 04. 12 | CNU10681 | BARCPI12 | MW315341 | EF1ACPI12        | MW348843 |
|                                    | 2019. 04. 12 | -        | -        | -        | EF1ACPI32        | MW348844 |
|                                    | 2019. 04. 12 | -        | -        | -        | EF1ACPI33        | MW348845 |
|                                    | 2019. 04. 12 | -        | -        | -        | EF1ACPI33        | MW348845 |
|                                    | 2019. 04. 12 | -        | -        | -        | EF1ACPI34        | MW348846 |
|                                    | 2018. 10. 03 | CNU8236  | BARCPU02 | MW315342 | -                | -        |
|                                    | 2018. 10. 03 | CNU8237  | BARCPU02 | MW315343 | -                | -        |
|                                    | 2012. 06. 20 | CP4551   | BARCPI01 | MW315344 | -                | -        |
|                                    | 2018. 06. 08 | CNU8196  | BARCPI01 | MW315345 | -                | -        |
|                                    | 2018. 06. 08 | CNU8198  | BARCPI05 | MW315346 | -                | -        |
|                                    | 2018. 06. 08 | CNU8199  | BARCPI01 | MW315347 | -                | -        |
|                                    | 2019. 04. 12 | CNU10682 | BARCPI01 | MW315348 | -                | -        |
|                                    | 2019. 04. 12 | CNU10683 | BARCPI01 | MW315349 | -                | -        |
|                                    | 2019. 04. 12 | CNU11055 | BARCPI04 | MW315350 | -                | -        |
|                                    | 2019. 04. 12 | CNU11056 | BARCPI01 | MW315351 | -                | -        |
| 13. Sancheong, GN (1)              | 2016. 08. 31 | CNU8486  | BARCPI09 | MW315352 | PI6 <sup>+</sup> | MW348847 |
|                                    | 2016. 08. 31 | -        | -        | -        | PI6 <sup>+</sup> | MW348847 |
|                                    | 2016. 08. 31 | -        | -        | -        | EF1ACPI22        | MW348848 |
|                                    | 2016. 08. 31 | -        | -        | -        | EF1ACPI23        | MW348849 |
|                                    | 2016. 08. 31 | -        | -        | -        | EF1ACPI24        | MW348850 |
| 14. Mt. Jayangsang, Haman; GN (1)  | 2016. 10. 06 | CNU8484  | BARCPI07 | MW315353 | PI4 <sup>+</sup> | MW348851 |
|                                    | 2016. 10. 06 | -        | -        | -        | PI5 <sup>+</sup> | MW348852 |
|                                    | 2016. 10. 06 | -        | -        | -        | PI5 <sup>+</sup> | MW348852 |
|                                    | 2016. 10. 06 | -        | -        | -        | EF1ACPI17        | MW348853 |
|                                    | 2016. 10. 06 | -        | -        | -        | EF1ACPI18        | MW348854 |
| 15. Geoje, GN (6)                  | 2018. 07. 09 | CNU8171  | BARCPU06 | MW315354 | EF1ACPU01        | MW348855 |
|                                    | 2018. 07. 09 | -        | -        | -        | EF1ACPU16        | MW348856 |
|                                    | 2018. 07. 09 | -        | -        | -        | EF1ACPU17        | MW348857 |
|                                    | 2018. 07. 09 | -        | -        | -        | EF1ACPU18        | MW348858 |
|                                    | 2018. 07. 09 | -        | -        | -        | EF1ACPU19        | MW348859 |
|                                    | 2018. 07. 09 | CNU8173  | BARCPU07 | MW315355 | PU3 <sup>+</sup> | MW348860 |
|                                    | 2018. 07. 09 | -        | -        | -        | PU3 <sup>+</sup> | MW348860 |
|                                    | 2018. 07. 09 | -        | -        | -        | EF1ACPU01        | MW348861 |
|                                    | 2018. 07. 09 | -        | -        | -        | EF1ACPU01        | MW348861 |
|                                    | 2018. 07. 09 | -        | -        | -        | EF1ACPU20        | MW348862 |
|                                    | 2018. 07. 09 | CNU8172  | BARCPU01 | MW315356 | -                | -        |
|                                    | 2018. 10. 07 | CNU8224  | BARCPU02 | MW315357 | -                | -        |
|                                    | 2012. 06. 29 | CP4555   | BARCPI05 | MW315358 | EF1ACPI12        | MW348863 |
|                                    | 2012. 06. 29 | -        | -        | -        | EF1ACPI12        | MW348863 |
|                                    | 2012. 06. 29 | -        | -        | -        | EF1ACPI14        | MW348864 |
|                                    | 2012. 06. 29 | -        | -        | -        | EF1ACPI15        | MW348865 |
|                                    | 2012. 06. 29 | -        | -        | -        | PI3 <sup>+</sup> | MW348866 |
|                                    | 2012. 06. 29 | CP4554   | BARCPI04 | MW315359 | -                | -        |
| 16. Changwon, GN (4)               | 2018. 10. 05 | CNU8220  | BARCPU02 | MW315360 | -                | -        |
|                                    | 2018. 10. 05 | CNU8221  | BARCPU13 | MW315361 | -                | -        |
|                                    | 2018. 10. 05 | CNU8222  | BARCPU01 | MW315362 | -                | -        |
|                                    | 2018. 10. 05 | CNU8223  | BARCPU02 | MW315363 | -                | -        |
| 17. Mt. Wonhyosan, Yangsan; GN (1) | 2016. 06. 30 | CNU8485  | BARCPI08 | MW315364 | EF1ACPI12        | MW348867 |
|                                    | 2016. 06. 30 | -        | -        | -        | EF1ACPI19        | MW348868 |
|                                    | 2016. 06. 30 | -        | -        | -        | EF1ACPI20        | MW348869 |
|                                    | 2016. 06. 30 | -        | -        | -        | EF1ACPI20        | MW348869 |
|                                    | 2016. 06. 30 | -        | -        | -        | EF1ACPI20        | MW348869 |
|                                    | 2016. 06. 30 | -        | -        | -        | EF1ACPI21        | MW348870 |
|                                    | 2016. 06. 30 | -        | -        | -        | EF1ACPI38        | MW348871 |
|                                    | 2016. 06. 30 | -        | -        | -        | EF1ACPI39        | MW348872 |
|                                    | 2016. 06. 30 | -        | -        | -        | EF1ACPI39        | MW348872 |
|                                    | 2016. 06. 30 | -        | -        | -        | EF1ACPI40        | MW348873 |
|                                    | 2016. 06. 30 | -        | -        | -        | EF1ACPI41        | MW348874 |

|                                         |              |         |          |          |                  |          |
|-----------------------------------------|--------------|---------|----------|----------|------------------|----------|
|                                         | 2016. 06. 30 | -       | -        | -        | EF1ACPI42        | MW348875 |
|                                         | 2016. 06. 30 | -       | -        | -        | EF1ACPI42        | MW348875 |
| 18. Mt. Hwawangsan, Changnyeong; GN (1) | 2014. 06. 26 | CNU8487 | BARCPI09 | MW315365 | -                | -        |
| 19. Cheongdo, GB (4)                    | 2018. 07. 09 | CNU8175 | BARCPU08 | MW315366 | EF1ACPU01        | MW348876 |
|                                         | 2018. 07. 09 | -       | -        | -        | EF1ACPU01        | MW348876 |
|                                         | 2018. 07. 09 | -       | -        | -        | EF1ACPU01        | MW348876 |
|                                         | 2018. 07. 09 | -       | -        | -        | EF1ACPU01        | MW348876 |
|                                         | 2018. 07. 09 | -       | -        | -        | EF1ACPU01        | MW348876 |
|                                         | 2018. 07. 09 | -       | -        | -        | EF1ACPU01        | MW348876 |
|                                         | 2018. 07. 09 | -       | -        | -        | EF1ACPU22        | MW348877 |
|                                         | 2018. 07. 09 | -       | -        | -        | EF1ACPU23        | MW348878 |
|                                         | 2018. 07. 09 | -       | -        | -        | EF1ACPU54        | MW348879 |
|                                         | 2018. 07. 09 | -       | -        | -        | EF1ACPU54        | MW348879 |
|                                         | 2018. 07. 09 | -       | -        | -        | EF1ACPU55        | MW348880 |
|                                         | 2018. 07. 09 | -       | -        | -        | EF1ACPU55        | MW348880 |
|                                         | 2018. 07. 09 | -       | -        | -        | PU4 <sup>+</sup> | MW348881 |
|                                         | 2018. 07. 09 | -       | -        | -        | PU4 <sup>+</sup> | MW348881 |
|                                         | 2018. 07. 09 | CNU8176 | BARCPU01 | MW315367 | -                | -        |
|                                         | 2018. 07. 09 | CNU8177 | BARCPU01 | MW315368 | -                | -        |
|                                         | 2018. 07. 09 | CNU8174 | BARCPU01 | MW315369 | -                | -        |
| 20. Gyeongju, GB (2)                    | 2012. 06. 25 | CP4552  | BARCPI02 | MW315370 | PI1 <sup>+</sup> | MW348882 |
|                                         | 2012. 06. 25 | -       | -        | -        | PI2 <sup>+</sup> | MW348883 |
|                                         | 2012. 06. 25 | -       | -        | -        | EF1ACPI05        | MW348884 |
|                                         | 2012. 06. 25 | -       | -        | -        | EF1ACPI06        | MW348885 |
|                                         | 2012. 06. 25 | -       | -        | -        | EF1ACPI07        | MW348886 |
|                                         | 2012. 06. 26 | CP4553  | BARCPI03 | MW315371 | EF1ACPI08        | MW348887 |
|                                         | 2012. 06. 26 | -       | -        | -        | EF1ACPI09        | MW348888 |
|                                         | 2012. 06. 26 | -       | -        | -        | EF1ACPI11        | MW348889 |
|                                         | 2012. 06. 26 | -       | -        | -        | EF1ACPI12        | MW348890 |
| 21. Jeju, JP (2)                        | 2018. 06. 15 | CNU8207 | BARCPU12 | MW315372 | EF1ACPU01        | MW348891 |
|                                         | 2018. 06. 15 | -       | -        | -        | EF1ACPU01        | MW348891 |
|                                         | 2018. 06. 15 | -       | -        | -        | EF1ACPU34        | MW348892 |
|                                         | 2018. 06. 15 | -       | -        | -        | EF1ACPU35        | MW348893 |
|                                         | 2018. 06. 15 | -       | -        | -        | EF1ACPU36        | MW348894 |
|                                         | 2018. 06. 28 | CNU8205 | BARCPU02 | MW315373 | -                | -        |

GG, Gyeonggido Province; GW, Gangwondo Province; JB, Jeollabukdo Province; JN, Jeollanamdo Province; GB, Gyeongsangbukdo Province; GN, Gyeongsangnamdo Province; and JP, Jeju Province. Numbers in parentheses indicate the sample size. Names starting with BARCPU indicate *COI* haplotypes of *C. punctiferalis*, whereas those starting with BARCPI indicate *COI* haplotypes of *C. pinicolalis*; <sup>+</sup>, untranslated haplotypes; -, individuals that were not sequenced for *COI* and *EF1α*.

**Table S2.** List of *COI* sequences of *Conogethes* species retrieved from GenBank and BOLD Systems

|    | Species                 | Locality         | Length<br>(bp) | Haplotype | GenBank       | BOLD         | References  |
|----|-------------------------|------------------|----------------|-----------|---------------|--------------|-------------|
|    |                         |                  |                |           | Accession no. | Bin no.      |             |
| 1  | <i>C. punctiferalis</i> | Korea            | 658            | BARCPU01  | KC136063      | BOLD:AAC8071 | Unpublished |
| 2  | <i>C. punctiferalis</i> | Korea            | 658            | BARCPU01  | KC136064      | BOLD:AAC8071 | Unpublished |
| 3  | <i>C. punctiferalis</i> | Korea            | 658            | BARCPU01  | KC136065      | BOLD:AAC8071 | Unpublished |
| 4  | <i>C. punctiferalis</i> | Korea            | 657            | BARCPU16  | JN087376      | BOLD:AAC8071 | Unpublished |
| 5  | <i>C. punctiferalis</i> | Korea            | 657            | BARCPU01  | MN609051      | BOLD:AAC8071 | Unpublished |
| 6  | <i>C. punctiferalis</i> | Korea            | 657            | BARCPU02  | MN609052      | BOLD:AAC8071 | Unpublished |
| 7  | <i>C. punctiferalis</i> | China            | 658            | BARCPU17  | MG954425      | -            | Unpublished |
| 8  | <i>C. punctiferalis</i> | China            | 658            | BARCPU18  | MG954426      | -            | Unpublished |
| 9  | <i>C. punctiferalis</i> | China            | 15,325         | BARCPU02  | KX150457      | -            | Unpublished |
| 10 | <i>C. punctiferalis</i> | China            | 15,355         | BARCPU10  | JX448619      | BOLD:AAC8071 | [1]         |
| 11 | <i>C. punctiferalis</i> | Pakistan         | 658            | BARCPU19  | KX862984      | BOLD:AAC8071 | [2]         |
| 12 | <i>C. punctiferalis</i> | Pakistan         | 658            | BARCPU19  | KX860179      | BOLD:AAC8071 | [2]         |
| 13 | <i>C. punctiferalis</i> | Pakistan         | 658            | BARCPU20  | JF857967      | BOLD:AAC8071 | Unpublished |
| 14 | <i>C. punctiferalis</i> | Pakistan         | 677            | BARCPU21  | MK301225      | BOLD:AAC8071 | Unpublished |
| 15 | <i>C. punctiferalis</i> | Australia        | 658            | BARCPU22  | HQ953119      | BOLD:AAD8750 | Unpublished |
| 16 | <i>C. punctiferalis</i> | Australia        | 658            | BARCPU22  | HQ953121      | BOLD:AAD8750 | Unpublished |
| 17 | <i>C. punctiferalis</i> | Australia        | 658            | BARCPU23  | HQ953122      | BOLD:AAD8750 | Unpublished |
| 18 | <i>C. punctiferalis</i> | Australia        | 658            | BARCPU22  | HQ953124      | BOLD:AAD8750 | Unpublished |
| 19 | <i>C. punctiferalis</i> | Australia        | 658            | BARCPU24  | HQ953125      | BOLD:AAD8750 | Unpublished |
| 20 | <i>C. punctiferalis</i> | Australia        | 658            | BARCPU25  | HQ953126      | BOLD:AAD8750 | Unpublished |
| 21 | <i>C. punctiferalis</i> | Australia        | 658            | BARCPU22  | -             | BOLD:AAD8750 | Unpublished |
| 22 | <i>C. punctiferalis</i> | Australia        | 658            | BARCPU26  | -             | BOLD:AAD8750 | Unpublished |
| 23 | <i>C. punctiferalis</i> | Australia        | 658            | BARCPU27  | -             | BOLD:AAD8750 | Unpublished |
| 24 | <i>C. punctiferalis</i> | Australia        | 658            | BARCPU25  | -             | BOLD:AAD8750 | Unpublished |
| 25 | <i>C. punctiferalis</i> | Australia        | 658            | BARCPU22  | -             | BOLD:AAD8750 | Unpublished |
| 26 | <i>C. punctiferalis</i> | Australia        | 658            | BARCPU28  | -             | BOLD:AAD8750 | Unpublished |
| 27 | <i>C. punctiferalis</i> | Australia        | 658            | BARCPU29  | -             | BOLD:AAD8750 | Unpublished |
| 28 | <i>C. punctiferalis</i> | Australia        | 658            | BARCPU22  | -             | BOLD:AAD8750 | Unpublished |
| 29 | <i>C. punctiferalis</i> | Australia        | 658            | BARCPU30  | -             | BOLD:AAD8750 | Unpublished |
| 30 | <i>C. punctiferalis</i> | Australia        | 658            | BARCPU31  | -             | BOLD:AAD8750 | Unpublished |
| 31 | <i>C. punctiferalis</i> | Australia        | 658            | BARCPU22  | -             | BOLD:AAD8750 | Unpublished |
| 32 | <i>C. punctiferalis</i> | Australia        | 658            | BARCPU25  | -             | BOLD:AAD8750 | Unpublished |
| 33 | <i>C. punctiferalis</i> | Japan            | 1,522          | BARCPU32  | AB751251      | BOLD:AAC8071 | Unpublished |
| 34 | <i>C. punctiferalis</i> | Thailand         | 658            | BARCPU02  | -             | BOLD:AAC8071 | Unpublished |
| 35 | <i>C. punctiferalis</i> | Thailand         | 658            | BARCPU33  | -             | BOLD:AAC8071 | Unpublished |
| 36 | <i>C. pluto</i>         | Papua New Guinea | 658            | BARCPL01  | KY323303      | BOLD:AAE1679 | [3]         |
| 37 | <i>C. pluto</i>         | Papua New Guinea | 658            | BARCPL01  | KY323373      | BOLD:AAE1679 | [3]         |
| 38 | <i>C. pluto</i>         | Papua New Guinea | 658            | BARCPL01  | KY323156      | BOLD:AAE1679 | [3]         |
| 39 | <i>C. pluto</i>         | Papua New Guinea | 658            | BARCPL01  | KY323116      | BOLD:AAE1679 | [3]         |
| 40 | <i>C. pluto</i>         | Papua New Guinea | 658            | BARCPL01  | KY323091      | BOLD:AAE1679 | [3]         |
| 41 | <i>C. pluto</i>         | Papua New Guinea | 658            | BARCPL01  | GU695720      | BOLD:AAE1679 | Unpublished |
| 42 | <i>C. pluto</i>         | Australia        | 658            | BARCPL01  | HQ953136      | BOLD:AAE1679 | Unpublished |
| 43 | <i>C. pluto</i>         | Australia        | 658            | BARCPL01  | HQ953110      | BOLD:AAE1679 | Unpublished |
| 44 | <i>C. pluto</i>         | Australia        | 658            | BARCPL01  | HQ953116      | BOLD:AAE1679 | Unpublished |
| 45 | <i>C. pluto</i>         | Australia        | 658            | BARCPL01  | HQ953118      | BOLD:AAE1679 | Unpublished |
| 46 | <i>C. pluto</i>         | Australia        | 658            | BARCPL02  | HQ953117      | BOLD:AAE1679 | Unpublished |
| 47 | <i>C. pluto</i>         | Australia        | 658            | BARCPL02  | HQ953134      | BOLD:AAE1679 | Unpublished |
| 48 | <i>C. pluto</i>         | Australia        | 658            | BARCPL02  | HQ953135      | BOLD:AAE1679 | Unpublished |
| 49 | <i>C. pluto</i>         | Australia        | 658            | BARCPL03  | -             | BOLD:AAE1679 | Unpublished |
| 50 | <i>C. pluto</i>         | Australia        | 658            | BARCPL04  | -             | BOLD:AAE1679 | Unpublished |
| 51 | <i>C. pluto</i>         | Australia        | 658            | BARCPL03  | -             | BOLD:AAE1679 | Unpublished |
| 52 | <i>C. pluto</i>         | Australia        | 658            | BARCPL05  | -             | BOLD:AAE1679 | Unpublished |
| 53 | <i>C. semifascialis</i> | Papua New Guinea | 658            | BARCSE01  | KY323243      | BOLD:AAF1272 | [3]         |
| 54 | <i>C. semifascialis</i> | Papua New Guinea | 658            | BARCSE02  | KY323190      | BOLD:AAF1272 | [3]         |
| 55 | <i>C. semifascialis</i> | Papua New Guinea | 658            | BARCSE01  | KY323309      | BOLD:AAF1272 | [3]         |
| 56 | <i>C. semifascialis</i> | Papua New Guinea | 658            | BARCSE03  | GU695721      | BOLD:AAF1272 | Unpublished |
| 57 | <i>C. semifascialis</i> | Papua New Guinea | 658            | BARCSE01  | -             | BOLD:AAF1272 | Unpublished |
| 58 | <i>C. semifascialis</i> | Australia        | 658            | BARCSE04  | HQ953123      | BOLD:AAF1272 | Unpublished |
| 59 | <i>C. semifascialis</i> | Australia        | 658            | BARCSE05  | HQ953120      | BOLD:AAF1272 | Unpublished |
| 60 | <i>C. semifascialis</i> | Australia        | 658            | BARCSE06  | KF392629      | BOLD:ABZ6085 | [4]         |
| 61 | <i>C. semifascialis</i> | Australia        | 658            | BARCSE07  | -             | BOLD:ABZ6085 | Unpublished |
| 62 | <i>C. semifascialis</i> | Australia        | 658            | BARCSE08  | -             | BOLD:ABZ6085 | Unpublished |
| 63 | <i>C. semifascialis</i> | Australia        | 658            | BARCSE07  | -             | BOLD:ABZ6085 | Unpublished |
| 64 | <i>C. semifascialis</i> | Australia        | 658            | BARCSE08  | -             | BOLD:ABZ6085 | Unpublished |
| 65 | <i>C. tharsalea</i>     | Australia        | 658            | BARCTH01  | HQ953137      | BOLD:AAJ7249 | Unpublished |
| 66 | <i>C. tharsalea</i>     | Australia        | 658            | BARCTH02  | HQ953138      | BOLD:AAJ7249 | Unpublished |
| 67 | <i>C. tharsalea</i>     | Australia        | 658            | BARCTH03  | HQ953139      | BOLD:AAJ7249 | Unpublished |
| 68 | <i>C. tharsalea</i>     | Australia        | 658            | BARCTH04  | -             | BOLD:AAJ7249 | Unpublished |
| 69 | <i>C. ersealis</i>      | Australia        | 658            | BARCER01  | HQ953132      | BOLD:AAO6794 | Unpublished |

|    |                       |                  |       |          |          |              |             |
|----|-----------------------|------------------|-------|----------|----------|--------------|-------------|
| 70 | <i>C. ersealis</i>    | Australia        | 658   | BARCER02 | HQ953133 | BOLD:AAO6794 | Unpublished |
| 71 | <i>C. diminutiva</i>  | Australia        | 658   | BARCDI01 | HQ953130 | BOLD:AAP0131 | Unpublished |
| 72 | <i>C. haemactalis</i> | Australia        | 658   | BARCHA01 | HQ953127 | BOLD:AAO4737 | Unpublished |
| 73 | <i>C. haemactalis</i> | Australia        | 658   | BARCHA01 | HQ953128 | BOLD:AAO4737 | Unpublished |
| 74 | <i>C. haemactalis</i> | Australia        | 658   | BARCHA01 | HQ953129 | BOLD:AAO4737 | Unpublished |
| 75 | <i>C. haemactalis</i> | Australia        | 658   | BARCHA01 | -        | BOLD:AAO4737 | Unpublished |
| 76 | <i>C. evaxalis</i>    | Australia        | 658   | BARCEV01 | HQ953111 | BOLD:ABZ8282 | Unpublished |
| 77 | <i>C. evaxalis</i>    | Australia        | 658   | BARCEV01 | HQ953114 | BOLD:ABZ8282 | Unpublished |
| 78 | <i>C. evaxalis</i>    | Australia        | 658   | BARCEV02 | HQ953115 | BOLD:ABZ8282 | Unpublished |
| 79 | <i>C. evaxalis</i>    | Papua New Guinea | 658   | BARCEV03 | JX970234 | BOLD:AAF1273 | Unpublished |
| 80 | <i>C. evaxalis</i>    | Papua New Guinea | 658   | BARCEV03 | JX970235 | BOLD:AAF1273 | Unpublished |
| 81 | <i>C. pandamalis</i>  | Malaysia         | 1,438 | BARCPA01 | MK459688 | BOLD:AEA7122 | [5]         |

-, not available.

**Table S3.** Pupal period and lifespan of *Conogethes pinicolalis* (days)

|                 | Pupae (no. of individuals) | Adult (no. of individuals) |
|-----------------|----------------------------|----------------------------|
| Mean $\pm$ S.D. | 12.02 $\pm$ 1.24 (46)      | 8.05 $\pm$ 5.09 (20)       |

Values indicate the mean  $\pm$  S.D. for each stage of *C. pinicolalis* development.

**Table S4.** Pairwise comparisons of *COI* haplotypes of *Conogethes* species

|    |                                                                   | 1  | 2    | 3    | 4    | 5    | 6    | 7    | 8    | 9    | 10   | 11   | 12   | 13   | 14   | 15   | 16   | 17   | 18   | 19   | 20   | 21   | 22   | 23   | 24   | 25   |
|----|-------------------------------------------------------------------|----|------|------|------|------|------|------|------|------|------|------|------|------|------|------|------|------|------|------|------|------|------|------|------|------|
| 1  | <i>C. punctiferalis</i> (Current study, BARCPU01)                 | -  | 0.92 | 0.76 | 1.07 | 1.07 | 0.76 | 0.76 | 1.07 | 1.07 | 0.76 | 1.37 | 0.15 | 1.22 | 1.07 | 1.07 | 1.07 | 0.92 | 1.07 | 0.15 | 1.07 | 1.07 | 5.04 | 5.19 | 4.89 | 5.04 |
| 2  | <i>C. punctiferalis</i> (Current study, China, Thailand BARCPU02) | 6  | -    | 0.15 | 0.46 | 0.15 | 0.15 | 0.31 | 0.15 | 0.15 | 0.15 | 0.76 | 1.07 | 0.31 | 0.15 | 0.15 | 0.15 | 0.31 | 0.15 | 0.76 | 0.15 | 0.15 | 5.34 | 5.50 | 5.19 | 5.34 |
| 3  | <i>C. punctiferalis</i> (Current study, BARCPU03)                 | 5  | 1    | -    | 0.31 | 0.31 | 0.31 | 0.15 | 0.31 | 0.31 | 0.31 | 0.92 | 0.92 | 0.46 | 0.31 | 0.31 | 0.31 | 0.15 | 0.31 | 0.92 | 0.31 | 0.31 | 5.50 | 5.65 | 5.34 | 5.50 |
| 4  | <i>C. punctiferalis</i> (Current study, BARCPU04)                 | 7  | 3    | 2    | -    | 0.61 | 0.61 | 0.46 | 0.61 | 0.61 | 0.61 | 1.22 | 1.22 | 0.76 | 0.61 | 0.61 | 0.61 | 0.46 | 0.61 | 1.22 | 0.61 | 0.61 | 5.19 | 5.34 | 5.04 | 5.19 |
| 5  | <i>C. punctiferalis</i> (Current study, BARCPU05)                 | 7  | 1    | 2    | 4    | -    | 0.31 | 0.46 | 0.31 | 0.31 | 0.31 | 0.92 | 1.22 | 0.46 | 0.31 | 0.31 | 0.31 | 0.46 | 0.31 | 0.92 | 0.31 | 0.31 | 5.50 | 5.65 | 5.34 | 5.50 |
| 6  | <i>C. punctiferalis</i> (Current study, BARCPU06)                 | 5  | 1    | 2    | 4    | 2    | -    | 0.46 | 0.31 | 0.31 | 0.31 | 0.92 | 0.92 | 0.46 | 0.31 | 0.31 | 0.31 | 0.46 | 0.31 | 0.61 | 0.31 | 0.31 | 5.34 | 5.50 | 5.19 | 5.34 |
| 7  | <i>C. punctiferalis</i> (Current study, BARCPU07)                 | 5  | 2    | 1    | 3    | 3    | -    | 0.46 | 0.46 | 0.46 | 0.46 | 1.07 | 0.92 | 0.61 | 0.46 | 0.46 | 0.46 | 0.31 | 0.46 | 0.92 | 0.46 | 0.46 | 5.50 | 5.65 | 5.34 | 5.50 |
| 8  | <i>C. punctiferalis</i> (Current study, BARCPU08)                 | 7  | 1    | 2    | 4    | 2    | 2    | 3    | -    | 0.31 | 0.31 | 0.92 | 1.22 | 0.46 | 0.31 | 0.31 | 0.31 | 0.46 | 0.31 | 0.92 | 0.31 | 0.31 | 5.50 | 5.65 | 5.34 | 5.50 |
| 9  | <i>C. punctiferalis</i> (Current study, BARCPU09)                 | 7  | 1    | 2    | 4    | 2    | 2    | 3    | 2    | -    | 0.31 | 0.92 | 0.92 | 0.15 | 0.31 | 0.31 | 0.31 | 0.46 | 0.31 | 0.92 | 0.31 | 0.31 | 5.19 | 5.34 | 5.04 | 5.19 |
| 10 | <i>C. punctiferalis</i> (Current study, China, BARCPU10)          | 5  | 1    | 2    | 4    | 2    | 2    | 3    | 2    | 2    | -    | 0.61 | 0.92 | 0.46 | 0.31 | 0.31 | 0.31 | 0.46 | 0.31 | 0.61 | 0.31 | 0.31 | 5.19 | 5.34 | 5.04 | 5.19 |
| 11 | <i>C. punctiferalis</i> (Current study, BARCPU11)                 | 9  | 5    | 6    | 8    | 6    | 6    | 7    | 6    | 6    | 4    | -    | 1.53 | 1.07 | 0.92 | 0.92 | 0.92 | 1.07 | 0.92 | 1.22 | 0.92 | 0.92 | 5.50 | 5.65 | 5.34 | 5.50 |
| 12 | <i>C. punctiferalis</i> (Current study, BARCPU12)                 | 1  | 7    | 6    | 8    | 8    | 6    | 6    | 8    | 6    | 6    | 10   | -    | 1.07 | 1.22 | 1.22 | 1.22 | 1.07 | 1.22 | 0.31 | 1.22 | 1.22 | 4.89 | 5.04 | 4.73 | 4.89 |
| 13 | <i>C. punctiferalis</i> (Current study, BARCPU13)                 | 8  | 2    | 3    | 5    | 3    | 3    | 4    | 3    | 1    | 3    | 7    | 7    | -    | 0.46 | 0.46 | 0.15 | 0.61 | 0.46 | 1.07 | 0.46 | 0.46 | 5.34 | 5.50 | 5.19 | 5.34 |
| 14 | <i>C. punctiferalis</i> (Current study, BARCPU14)                 | 7  | 1    | 2    | 4    | 2    | 2    | 3    | 2    | 2    | 2    | 6    | 8    | 3    | -    | 0.31 | 0.31 | 0.46 | 0.31 | 0.92 | 0.31 | 0.31 | 5.50 | 5.65 | 5.34 | 5.50 |
| 15 | <i>C. punctiferalis</i> (Current study, BARCPU15)                 | 7  | 1    | 2    | 4    | 2    | 2    | 3    | 2    | 2    | 2    | 6    | 8    | 3    | 2    | -    | 0.31 | 0.46 | 0.31 | 0.92 | 0.31 | 0.31 | 5.50 | 5.65 | 5.34 | 5.50 |
| 16 | <i>C. punctiferalis</i> (Korea, BARCPU16)                         | 7  | 1    | 2    | 4    | 2    | 2    | 3    | 2    | 2    | 2    | 6    | 8    | 1    | 2    | 2    | -    | 0.46 | 0.31 | 0.92 | 0.31 | 0.31 | 5.50 | 5.65 | 5.34 | 5.50 |
| 17 | <i>C. punctiferalis</i> (China, BARCPU17)                         | 6  | 2    | 1    | 3    | 3    | 3    | 2    | 3    | 3    | 3    | 7    | 7    | 4    | 3    | 3    | 3    | -    | 0.46 | 1.07 | 0.46 | 0.46 | 5.65 | 5.80 | 5.50 | 5.65 |
| 18 | <i>C. punctiferalis</i> (China, BARCPU18)                         | 7  | 1    | 2    | 4    | 2    | 2    | 3    | 2    | 2    | 2    | 6    | 8    | 3    | 2    | 2    | 2    | 3    | -    | 0.92 | 0.31 | 0.31 | 5.50 | 5.65 | 5.34 | 5.50 |
| 19 | <i>C. punctiferalis</i> (Pakistan, BARCPU19)                      | 1  | 5    | 6    | 8    | 6    | 4    | 6    | 6    | 6    | 4    | 8    | 2    | 7    | 6    | 6    | 6    | 7    | 6    | -    | 0.92 | 0.92 | 4.89 | 5.04 | 4.73 | 4.89 |
| 20 | <i>C. punctiferalis</i> (Pakistan, BARCPU20)                      | 7  | 1    | 2    | 4    | 2    | 2    | 3    | 2    | 2    | 2    | 6    | 8    | 3    | 2    | 2    | 2    | 3    | 2    | 6    | -    | 0.31 | 5.50 | 5.65 | 5.34 | 5.50 |
| 21 | <i>C. punctiferalis</i> (Pakistan, BARCPU21)                      | 7  | 1    | 2    | 4    | 2    | 2    | 3    | 2    | 2    | 2    | 6    | 8    | 3    | 2    | 2    | 2    | 3    | 2    | 6    | 2    | -    | 5.50 | 5.65 | 5.34 | 5.50 |
| 22 | <i>C. punctiferalis</i> (Australia, BARCPU22)                     | 33 | 35   | 36   | 34   | 36   | 35   | 36   | 36   | 34   | 34   | 36   | 32   | 35   | 36   | 36   | 36   | 37   | 36   | 32   | 36   | 36   | -    | 0.15 | 0.15 | 0.31 |
| 23 | <i>C. punctiferalis</i> (Australia, BARCPU23)                     | 34 | 36   | 37   | 35   | 37   | 36   | 37   | 37   | 35   | 35   | 37   | 33   | 36   | 37   | 37   | 37   | 38   | 37   | 33   | 37   | 37   | 1    | -    | 0.31 | 0.46 |
| 24 | <i>C. punctiferalis</i> (Australia, BARCPU24)                     | 32 | 34   | 35   | 33   | 35   | 34   | 35   | 35   | 33   | 33   | 35   | 31   | 34   | 35   | 35   | 35   | 36   | 35   | 31   | 35   | 35   | 1    | 2    | -    | 0.46 |
| 25 | <i>C. punctiferalis</i> (Australia, BARCPU25)                     | 33 | 35   | 36   | 34   | 36   | 35   | 36   | 36   | 34   | 34   | 36   | 32   | 35   | 36   | 36   | 36   | 37   | 36   | 32   | 36   | 36   | 2    | 3    | 3    | -    |
| 26 | <i>C. punctiferalis</i> (Australia, BARCPU26)                     | 34 | 36   | 37   | 35   | 37   | 36   | 37   | 35   | 35   | 35   | 37   | 33   | 36   | 37   | 37   | 37   | 38   | 37   | 33   | 37   | 37   | 1    | 2    | 2    | 3    |
| 27 | <i>C. punctiferalis</i> (Australia, BARCPU27)                     | 16 | 17   | 16   | 16   | 18   | 16   | 17   | 18   | 16   | 16   | 20   | 15   | 17   | 18   | 18   | 18   | 17   | 18   | 17   | 18   | 16   | 29   | 30   | 28   | 29   |
| 28 | <i>C. punctiferalis</i> (Australia, BARCPU28)                     | 32 | 34   | 35   | 33   | 35   | 34   | 35   | 35   | 33   | 33   | 35   | 31   | 34   | 35   | 35   | 35   | 36   | 35   | 31   | 35   | 35   | 1    | 2    | 2    | 3    |
| 29 | <i>C. punctiferalis</i> (Australia, BARCPU29)                     | 32 | 34   | 35   | 33   | 35   | 34   | 35   | 35   | 33   | 33   | 35   | 31   | 34   | 35   | 35   | 35   | 36   | 35   | 31   | 35   | 35   | 1    | 2    | 2    | 3    |
| 30 | <i>C. punctiferalis</i> (Australia, BARCPU30)                     | 34 | 36   | 37   | 35   | 37   | 36   | 37   | 37   | 35   | 35   | 37   | 33   | 36   | 37   | 37   | 37   | 38   | 37   | 33   | 37   | 37   | 1    | 2    | 2    | 3    |
| 31 | <i>C. punctiferalis</i> (Australia, BARCPU31)                     | 15 | 16   | 15   | 15   | 17   | 15   | 16   | 17   | 15   | 15   | 19   | 14   | 16   | 17   | 17   | 17   | 16   | 17   | 16   | 17   | 15   | 28   | 29   | 27   | 28   |
| 32 | <i>C. punctiferalis</i> (Japan, BARCPU32)                         | 7  | 1    | 2    | 4    | 2    | 2    | 3    | 2    | 2    | 2    | 6    | 8    | 3    | 2    | 2    | 2    | 3    | 2    | 6    | 2    | 2    | 36   | 37   | 35   | 36   |
| 33 | <i>C. punctiferalis</i> (Thailand, BARCPU33)                      | 6  | 2    | 3    | 3    | 3    | 3    | 4    | 3    | 3    | 1    | 5    | 7    | 4    | 3    | 3    | 3    | 4    | 3    | 5    | 3    | 3    | 33   | 34   | 32   | 33   |
| 34 | <i>C. pinicolalis</i> (Current study, BARCP101)                   | 34 | 35   | 34   | 33   | 36   | 36   | 35   | 34   | 34   | 34   | 38   | 33   | 35   | 36   | 36   | 36   | 33   | 36   | 35   | 36   | 36   | 44   | 45   | 43   | 44   |
| 35 | <i>C. pinicolalis</i> (Current study, BARCP102)                   | 34 | 37   | 36   | 35   | 38   | 36   | 37   | 36   | 36   | 36   | 40   | 33   | 37   | 38   | 38   | 38   | 35   | 38   | 35   | 38   | 38   | 45   | 46   | 44   | 45   |
| 36 | <i>C. pinicolalis</i> (Current study, BARCP103)                   | 34 | 35   | 36   | 35   | 34   | 36   | 36   | 36   | 34   | 34   | 38   | 33   | 35   | 36   | 36   | 36   | 35   | 36   | 33   | 36   | 36   | 42   | 43   | 41   | 42   |
| 37 | <i>C. pinicolalis</i> (Current study, BARCP104)                   | 34 | 37   | 36   | 35   | 38   | 38   | 36   | 36   | 36   | 36   | 40   | 33   | 37   | 38   | 38   | 38   | 35   | 38   | 35   | 38   | 38   | 44   | 45   | 43   | 44   |
| 38 | <i>C. pinicolalis</i> (Current study, BARCP105)                   | 35 | 36   | 35   | 34   | 37   | 37   | 36   | 35   | 35   | 35   | 39   | 34   | 36   | 37   | 37   | 37   | 34   | 37   | 36   | 37   | 37   | 45   | 46   | 44   | 45   |
| 39 | <i>C. pinicolalis</i> (Current study, BARCP106)                   | 33 | 34   | 33   | 32   | 35   | 35   | 34   | 33   | 33   | 33   | 37   | 32   | 34   | 35   | 35   | 35   | 32   | 35   | 34   | 35   | 35   | 43   | 44   | 42   | 43   |
| 40 | <i>C. pinicolalis</i> (Current study, BARCP107)                   | 35 | 36   | 35   | 34   | 37   | 37   | 36   | 35   | 35   | 35   | 39   | 34   | 36   | 37   | 37   | 37   | 34   | 37   | 36   | 37   | 37   | 45   | 46   | 44   | 45   |
| 41 | <i>C. pinicolalis</i> (Current study, BARCP108)                   | 34 | 35   | 36   | 35   | 36   | 34   | 37   | 34   | 34   | 34   | 38   | 33   | 35   | 36   | 36   | 36   | 35   | 36   | 33   | 36   | 36   | 43   | 44   | 42   | 43   |
| 42 | <i>C. pinicolalis</i> (Current study, BARCP109)                   | 37 | 38   | 37   | 36   | 39   | 39   | 38   | 37   | 37   | 37   | 41   | 36   | 38   | 39   | 39   | 39   | 36   | 39   | 38   | 39   | 39   | 44   | 45   | 43   | 44   |
| 43 | <i>C. pinicolalis</i> (Current study, BARCP110)                   | 34 | 35   | 34   | 33   | 36   | 36   | 35   | 34   | 34   | 34   | 38   | 33   | 35   | 36   | 36   | 36   | 33   | 36   | 35   | 36   | 36   | 44   | 45   | 43   | 44   |
| 44 | <i>C. pinicolalis</i> (Current study, BARCP111)                   | 33 | 36   | 35   | 34   | 37   | 37   | 35   | 35   | 35   | 35   | 39   | 32   | 36   | 37   | 37   | 37   | 34   | 37   | 34   | 37   | 37   | 45   | 46   | 44   | 45   |
| 45 | <i>C. pinicolalis</i> (Current study, BARCP112)                   | 35 | 36   | 35   | 34   | 37   | 37   | 36   | 35   | 35   | 35   | 39   | 34   | 36   | 37   | 37   | 37   | 34   | 37   | 36   | 37   | 37   | 45   | 46   | 44   | 45   |
| 46 | <i>C. pluto</i> (Papua New Guinea, Australia, BARCP101)           | 37 | 40   | 41   | 39   | 41   | 39   | 41   | 41   | 39   | 39   | 43   | 36   | 40   | 41   | 41   | 41   | 42   | 41   | 36   | 41   | 41   | 40   | 41   | 41   | 40   |
| 47 | <i>C. pluto</i> (Australia, BARCP102)                             | 38 | 41   | 42   | 40   | 42   | 40   | 42   | 42   | 40   | 40   | 44   | 37   | 41   | 42   | 42   | 42   | 43   | 42   | 37   | 42   | 42   | 41   | 42   | 42   | 41   |
| 48 | <i>C. pluto</i> (Australia, BARCP103)                             | 36 | 39   | 40   | 38   | 40   | 38   | 40   | 40   | 38   | 38   | 42   | 35   | 39   | 40   | 40   | 40   | 41   | 40   | 35   | 40   | 40   | 41   | 42   | 42   | 41   |
| 49 | <i>C. pluto</i> (Australia, BARCP104)                             | 37 | 40   | 41   | 39   | 41   | 39   | 41   | 41   | 39   | 39   | 43   | 36   | 40   | 41   | 41   | 41   | 42   | 41   | 36   | 41   | 41   | 40   | 41   | 41   | 40   |
| 50 | <i>C. pluto</i> (Australia, BARCP105)                             | 38 | 41   | 42   | 40   | 42   | 40   | 42   | 42   | 40   | 40   | 44   | 37   | 41   | 42   | 42   | 42   | 43   | 42   | 37   | 42   | 42   | 39   | 40   | 40   | 39   |
| 51 | <i>C. semifascialis</i> (Papua New Guinea, BARCSE01)              | 34 | 35   | 35   | 33   | 36   | 35   | 36   | 36   | 34   | 34   | 36   | 33   | 35   | 36   | 36   | 36   | 34   | 36   | 34   | 36   | 36   | 25   | 26   | 26   | 25   |
| 52 | <i>C. semifascialis</i> (Papua New Guinea, BARCSE02)              | 36 | 37   | 37   | 35   | 38   | 37   | 38   | 38   | 36   | 36   | 38   | 35   | 37   | 38   | 38   | 38   | 36   | 38   | 36   | 38   | 38   | 25   | 26   | 26   | 25   |
| 53 | <i>C. semifascialis</i> (Papua New Guinea, BARCSE03)              | 36 | 37   | 37   | 35   | 38   | 37   | 38   | 38   | 36   | 36   | 38   | 35   | 37   | 38   | 38   | 38   | 36   | 38   | 36   | 38   | 38   | 25   | 26   | 26   | 25   |
| 54 | <i>C. semifascialis</i> (Australia, BARCSE04)                     | 35 | 36   | 36   | 34   | 37   | 36   | 37   | 37   | 35   | 35   | 37   | 34   | 36   | 37   | 37   | 37   | 35   | 37   | 35   | 37   | 37   | 26   | 27   | 27   | 26   |
| 55 | <i>C. semifascialis</i> (Australia, BARCSE05)                     | 35 | 36   | 36   | 34   | 37   | 36   | 37   | 37   | 35   | 35   | 37   | 34   | 36   | 37   | 37   | 37   | 35   | 37   | 35   | 37   | 37   | 28   | 29   | 29   | 28   |
| 56 | <i>C. semifascialis</i> (Australia, BARCSE06)                     | 16 | 17   | 16   | 16   | 18   | 16   | 17   | 18   | 16   | 16   | 20   | 15   | 17   | 18   | 18   | 18   | 17   | 18   | 17   | 18   | 16   | 29   | 30   | 28   | 29   |
| 57 | <i>C. semifascialis</i> (Australia, BARCSE07)                     |    |      |      |      |      |      |      |      |      |      |      |      |      |      |      |      |      |      |      |      |      |      |      |      |      |



|    |                                             |    |    |    |    |    |    |    |    |    |    |    |    |    |    |    |    |    |    |    |    |    |    |    |    |    |
|----|---------------------------------------------|----|----|----|----|----|----|----|----|----|----|----|----|----|----|----|----|----|----|----|----|----|----|----|----|----|
| 63 | <i>C. ersealis</i> (Australia, BARCER01)    | 51 | 53 | 54 | 53 | 54 | 53 | 54 | 54 | 52 | 52 | 56 | 50 | 53 | 54 | 54 | 54 | 55 | 52 | 50 | 54 | 52 | 48 | 49 | 49 | 48 |
| 64 | <i>C. ersealis</i> (Australia, BARCER02)    | 49 | 51 | 52 | 51 | 52 | 51 | 52 | 52 | 50 | 50 | 54 | 48 | 51 | 52 | 52 | 52 | 53 | 50 | 48 | 52 | 50 | 46 | 47 | 47 | 46 |
| 65 | <i>C. diminutiva</i> (Australia, BARCDI01)  | 51 | 55 | 54 | 53 | 54 | 55 | 54 | 56 | 54 | 54 | 58 | 50 | 55 | 56 | 56 | 56 | 55 | 54 | 52 | 56 | 56 | 56 | 57 | 57 | 56 |
| 66 | <i>C. haemactalis</i> (Australia, BARCHA01) | 63 | 63 | 63 | 61 | 63 | 64 | 64 | 64 | 62 | 62 | 66 | 62 | 63 | 64 | 64 | 64 | 64 | 62 | 63 | 64 | 62 | 63 | 64 | 64 | 65 |
| 67 | <i>C. evaxalis</i> (Australia, BARCEV01)    | 57 | 59 | 59 | 58 | 60 | 58 | 59 | 60 | 58 | 58 | 62 | 56 | 59 | 60 | 60 | 60 | 60 | 57 | 60 | 58 | 61 | 62 | 60 | 61 |    |
| 68 | <i>C. evaxalis</i> (Australia, BARCEV02)    | 56 | 58 | 58 | 57 | 59 | 57 | 58 | 59 | 57 | 57 | 61 | 55 | 58 | 59 | 59 | 59 | 59 | 59 | 56 | 59 | 57 | 62 | 63 | 61 | 62 |
| 69 | <i>C. evaxalis</i> (Australia, BARCEV03)    | 52 | 52 | 52 | 51 | 53 | 51 | 53 | 53 | 51 | 51 | 55 | 51 | 52 | 53 | 53 | 53 | 53 | 53 | 52 | 53 | 51 | 66 | 67 | 65 | 66 |
| 70 | <i>C. pandamalis</i> (Malaysia, BARCPA01)   | 38 | 39 | 38 | 38 | 38 | 40 | 38 | 38 | 38 | 38 | 42 | 37 | 39 | 40 | 40 | 40 | 39 | 40 | 39 | 40 | 38 | 46 | 47 | 47 | 46 |

|    |                                                                   | 26   | 27   | 28   | 29   | 30   | 31   | 32   | 33   | 34   | 35   | 36   | 37   | 38   | 39   | 40   | 41   | 42   | 43   | 44   | 45   | 46   | 47   | 48   | 49   | 50   |
|----|-------------------------------------------------------------------|------|------|------|------|------|------|------|------|------|------|------|------|------|------|------|------|------|------|------|------|------|------|------|------|------|
| 1  | <i>C. punctiferalis</i> (Current study, BARCPU01)                 | 5.19 | 2.44 | 4.89 | 4.89 | 5.19 | 2.29 | 1.07 | 0.92 | 5.19 | 5.19 | 5.19 | 5.19 | 5.34 | 5.04 | 5.34 | 5.19 | 5.65 | 5.19 | 5.04 | 5.34 | 5.65 | 5.80 | 5.50 | 5.65 | 5.80 |
| 2  | <i>C. punctiferalis</i> (Current study, China, Thailand BARCPU02) | 5.50 | 2.60 | 5.19 | 5.19 | 5.50 | 2.44 | 0.15 | 0.31 | 5.34 | 5.65 | 5.34 | 5.65 | 5.50 | 5.19 | 5.50 | 5.34 | 5.80 | 5.34 | 5.50 | 5.50 | 6.11 | 6.26 | 5.95 | 6.11 | 6.26 |
| 3  | <i>C. punctiferalis</i> (Current study, BARCPU03)                 | 5.65 | 2.44 | 5.34 | 5.34 | 5.65 | 2.29 | 0.31 | 0.46 | 5.19 | 5.50 | 5.50 | 5.50 | 5.34 | 5.04 | 5.34 | 5.50 | 5.65 | 5.19 | 5.34 | 5.34 | 6.26 | 6.41 | 6.11 | 6.26 | 6.41 |
| 4  | <i>C. punctiferalis</i> (Current study, BARCPU04)                 | 5.34 | 2.44 | 5.04 | 5.04 | 5.34 | 2.29 | 0.61 | 0.46 | 5.04 | 5.34 | 5.34 | 5.34 | 5.19 | 4.89 | 5.19 | 5.34 | 5.50 | 5.04 | 5.19 | 5.19 | 5.95 | 6.11 | 5.80 | 5.95 | 6.11 |
| 5  | <i>C. punctiferalis</i> (Current study, BARCPU05)                 | 5.65 | 2.75 | 5.34 | 5.34 | 5.65 | 2.60 | 0.31 | 0.46 | 5.50 | 5.80 | 5.19 | 5.80 | 5.65 | 5.34 | 5.65 | 5.50 | 5.95 | 5.50 | 5.65 | 5.65 | 6.26 | 6.41 | 6.11 | 6.26 | 6.41 |
| 6  | <i>C. punctiferalis</i> (Current study, BARCPU06)                 | 5.50 | 2.44 | 5.19 | 5.19 | 5.50 | 2.29 | 0.31 | 0.46 | 5.50 | 5.50 | 5.50 | 5.80 | 5.65 | 5.34 | 5.65 | 5.19 | 5.95 | 5.50 | 5.65 | 5.65 | 5.95 | 6.11 | 5.80 | 5.95 | 6.11 |
| 7  | <i>C. punctiferalis</i> (Current study, BARCPU07)                 | 5.65 | 2.60 | 5.34 | 5.34 | 5.65 | 2.44 | 0.46 | 0.61 | 5.34 | 5.65 | 5.50 | 5.50 | 5.50 | 5.19 | 5.50 | 5.65 | 5.80 | 5.34 | 5.34 | 5.50 | 6.26 | 6.41 | 6.11 | 6.26 | 6.41 |
| 8  | <i>C. punctiferalis</i> (Current study, BARCPU08)                 | 5.34 | 2.75 | 5.34 | 5.34 | 5.65 | 2.60 | 0.31 | 0.46 | 5.19 | 5.50 | 5.50 | 5.50 | 5.34 | 5.04 | 5.34 | 5.19 | 5.65 | 5.19 | 5.34 | 5.34 | 6.26 | 6.41 | 6.11 | 6.26 | 6.41 |
| 9  | <i>C. punctiferalis</i> (Current study, BARCPU09)                 | 5.34 | 2.44 | 5.04 | 5.04 | 5.34 | 2.29 | 0.31 | 0.46 | 5.19 | 5.50 | 5.19 | 5.50 | 5.34 | 5.04 | 5.34 | 5.19 | 5.65 | 5.19 | 5.34 | 5.34 | 5.95 | 6.11 | 5.80 | 5.95 | 6.11 |
| 10 | <i>C. punctiferalis</i> (Current study, China, BARCPU10)          | 5.34 | 2.44 | 5.04 | 5.04 | 5.34 | 2.29 | 0.31 | 0.15 | 5.19 | 5.50 | 5.19 | 5.50 | 5.34 | 5.04 | 5.34 | 5.19 | 5.65 | 5.19 | 5.34 | 5.34 | 5.95 | 6.11 | 5.80 | 5.95 | 6.11 |
| 11 | <i>C. punctiferalis</i> (Current study, BARCPU11)                 | 5.65 | 3.05 | 5.34 | 5.34 | 5.65 | 2.90 | 0.92 | 0.76 | 5.80 | 6.11 | 5.80 | 6.11 | 5.95 | 5.65 | 5.95 | 5.80 | 6.26 | 5.80 | 5.95 | 5.95 | 6.57 | 6.72 | 6.41 | 6.57 | 6.72 |
| 12 | <i>C. punctiferalis</i> (Current study, BARCPU12)                 | 5.04 | 2.29 | 4.73 | 4.73 | 5.04 | 2.14 | 1.22 | 1.07 | 5.04 | 5.04 | 5.04 | 5.04 | 5.19 | 4.89 | 5.19 | 5.04 | 5.50 | 5.04 | 4.89 | 5.19 | 5.50 | 5.65 | 5.34 | 5.50 | 5.65 |
| 13 | <i>C. punctiferalis</i> (Current study, BARCPU13)                 | 5.50 | 2.60 | 5.19 | 5.19 | 5.50 | 2.44 | 0.46 | 0.61 | 5.34 | 5.65 | 5.34 | 5.65 | 5.50 | 5.19 | 5.50 | 5.34 | 5.80 | 5.34 | 5.50 | 5.50 | 6.11 | 6.26 | 5.95 | 6.11 | 6.26 |
| 14 | <i>C. punctiferalis</i> (Current study, BARCPU14)                 | 5.65 | 2.75 | 5.34 | 5.34 | 5.65 | 2.60 | 0.31 | 0.46 | 5.50 | 5.80 | 5.50 | 5.80 | 5.65 | 5.34 | 5.65 | 5.50 | 5.95 | 5.50 | 5.65 | 5.65 | 6.26 | 6.41 | 6.11 | 6.26 | 6.41 |
| 15 | <i>C. punctiferalis</i> (Current study, BARCPU15)                 | 5.65 | 2.75 | 5.34 | 5.34 | 5.65 | 2.60 | 0.31 | 0.46 | 5.50 | 5.80 | 5.50 | 5.80 | 5.65 | 5.34 | 5.65 | 5.50 | 5.95 | 5.50 | 5.65 | 5.65 | 6.26 | 6.41 | 6.11 | 6.26 | 6.41 |
| 16 | <i>C. punctiferalis</i> (Korea, BARCPU16)                         | 5.65 | 2.75 | 5.34 | 5.34 | 5.65 | 2.60 | 0.31 | 0.46 | 5.50 | 5.80 | 5.50 | 5.80 | 5.65 | 5.34 | 5.65 | 5.50 | 5.95 | 5.50 | 5.65 | 5.65 | 6.26 | 6.41 | 6.11 | 6.26 | 6.41 |
| 17 | <i>C. punctiferalis</i> (China, BARCPU17)                         | 5.80 | 2.60 | 5.50 | 5.50 | 5.80 | 2.44 | 0.46 | 0.61 | 5.04 | 5.34 | 5.34 | 5.34 | 5.19 | 4.89 | 5.19 | 5.34 | 5.50 | 5.04 | 5.19 | 5.19 | 6.41 | 6.57 | 6.26 | 6.41 | 6.57 |
| 18 | <i>C. punctiferalis</i> (China, BARCPU18)                         | 5.65 | 2.75 | 5.34 | 5.34 | 5.65 | 2.60 | 0.31 | 0.46 | 5.50 | 5.80 | 5.50 | 5.80 | 5.65 | 5.34 | 5.65 | 5.50 | 5.95 | 5.50 | 5.65 | 5.65 | 6.26 | 6.41 | 6.11 | 6.26 | 6.41 |
| 19 | <i>C. punctiferalis</i> (Pakistan, BARCPU19)                      | 5.04 | 2.60 | 4.73 | 4.73 | 5.04 | 2.44 | 0.92 | 0.76 | 5.34 | 5.34 | 5.04 | 5.34 | 5.50 | 5.19 | 5.50 | 5.04 | 5.80 | 5.34 | 5.19 | 5.50 | 5.50 | 5.65 | 5.34 | 5.50 | 5.65 |
| 20 | <i>C. punctiferalis</i> (Pakistan, BARCPU20)                      | 5.65 | 2.75 | 5.34 | 5.34 | 5.65 | 2.60 | 0.31 | 0.46 | 5.50 | 5.80 | 5.50 | 5.80 | 5.65 | 5.34 | 5.65 | 5.50 | 5.95 | 5.50 | 5.65 | 5.65 | 6.26 | 6.41 | 6.11 | 6.26 | 6.41 |
| 21 | <i>C. punctiferalis</i> (Pakistan, BARCPU21)                      | 5.65 | 2.44 | 5.34 | 5.34 | 5.65 | 2.29 | 0.31 | 0.46 | 5.50 | 5.80 | 5.50 | 5.80 | 5.65 | 5.34 | 5.65 | 5.50 | 5.95 | 5.50 | 5.65 | 5.65 | 6.26 | 6.41 | 6.11 | 6.26 | 6.41 |
| 22 | <i>C. punctiferalis</i> (Australia, BARCPU22)                     | 0.15 | 4.43 | 0.15 | 0.15 | 0.15 | 4.28 | 5.50 | 5.04 | 6.72 | 6.87 | 6.41 | 6.72 | 6.87 | 6.57 | 6.87 | 6.57 | 6.72 | 6.72 | 6.87 | 6.87 | 6.11 | 6.26 | 6.26 | 6.11 | 5.95 |
| 23 | <i>C. punctiferalis</i> (Australia, BARCPU23)                     | 0.31 | 4.58 | 0.31 | 0.31 | 0.31 | 4.43 | 5.65 | 5.19 | 6.87 | 7.02 | 6.57 | 6.87 | 7.02 | 6.72 | 7.02 | 6.72 | 6.87 | 6.87 | 7.02 | 7.02 | 6.26 | 6.41 | 6.41 | 6.26 | 6.11 |
| 24 | <i>C. punctiferalis</i> (Australia, BARCPU24)                     | 0.31 | 4.28 | 0.31 | 0.31 | 0.31 | 4.12 | 5.34 | 4.89 | 6.57 | 6.72 | 6.26 | 6.57 | 6.72 | 6.41 | 6.72 | 6.41 | 6.57 | 6.57 | 6.72 | 6.72 | 6.26 | 6.41 | 6.41 | 6.26 | 6.11 |
| 25 | <i>C. punctiferalis</i> (Australia, BARCPU25)                     | 0.46 | 4.43 | 0.46 | 0.46 | 0.46 | 4.28 | 5.50 | 5.04 | 6.72 | 6.87 | 6.41 | 6.72 | 6.87 | 6.57 | 6.87 | 6.57 | 6.72 | 6.72 | 6.87 | 6.87 | 6.11 | 6.26 | 6.26 | 6.11 | 5.95 |
| 26 | <i>C. punctiferalis</i> (Australia, BARCPU26)                     | -    | 4.58 | 0.31 | 0.31 | 0.31 | 4.43 | 5.65 | 5.19 | 6.57 | 6.72 | 6.57 | 6.57 | 6.72 | 6.41 | 6.72 | 6.41 | 6.57 | 6.57 | 6.72 | 6.72 | 6.26 | 6.41 | 6.41 | 6.26 | 6.11 |
| 27 | <i>C. punctiferalis</i> (Australia, BARCPU27)                     | 30   | -    | 4.28 | 4.28 | 4.58 | 0.15 | 2.75 | 2.60 | 5.50 | 5.50 | 5.50 | 5.80 | 5.65 | 5.34 | 5.65 | 5.50 | 5.65 | 5.50 | 5.65 | 5.65 | 6.26 | 6.41 | 6.11 | 6.26 | 6.11 |
| 28 | <i>C. punctiferalis</i> (Australia, BARCPU28)                     | 2    | 28   | -    | 0.31 | 0.31 | 4.12 | 5.34 | 4.89 | 6.57 | 6.72 | 6.26 | 6.57 | 6.72 | 6.41 | 6.72 | 6.41 | 6.57 | 6.57 | 6.72 | 6.72 | 5.95 | 6.11 | 6.11 | 5.95 | 5.80 |
| 29 | <i>C. punctiferalis</i> (Australia, BARCPU29)                     | 2    | 28   | 2    | -    | 0.31 | 4.12 | 5.34 | 4.89 | 6.57 | 6.72 | 6.26 | 6.57 | 6.72 | 6.41 | 6.72 | 6.41 | 6.57 | 6.57 | 6.72 | 6.72 | 6.26 | 6.41 | 6.41 | 6.26 | 6.11 |
| 30 | <i>C. punctiferalis</i> (Australia, BARCPU30)                     | 2    | 30   | 2    | 2    | -    | 4.43 | 5.65 | 5.19 | 6.87 | 7.02 | 6.57 | 6.87 | 7.02 | 6.72 | 7.02 | 6.72 | 6.87 | 6.87 | 7.02 | 7.02 | 6.26 | 6.41 | 6.41 | 6.26 | 6.11 |
| 31 | <i>C. punctiferalis</i> (Australia, BARCPU31)                     | 29   | 1    | 27   | 27   | 29   | -    | 2.60 | 2.44 | 5.34 | 5.34 | 5.34 | 5.65 | 5.50 | 5.19 | 5.50 | 5.34 | 5.50 | 5.34 | 5.50 | 5.50 | 6.11 | 6.26 | 5.95 | 6.11 | 5.95 |
| 32 | <i>C. punctiferalis</i> (Japan, BARCPU32)                         | 37   | 18   | 35   | 35   | 37   | 17   | -    | 0.46 | 5.50 | 5.80 | 5.50 | 5.80 | 5.65 | 5.34 | 5.65 | 5.50 | 5.95 | 5.50 | 5.65 | 5.65 | 6.26 | 6.41 | 6.11 | 6.26 | 6.41 |
| 33 | <i>C. punctiferalis</i> (Thailand, BARCPU33)                      | 34   | 17   | 32   | 32   | 34   | 16   | 3    | -    | 5.19 | 5.50 | 5.19 | 5.50 | 5.34 | 5.04 | 5.34 | 5.19 | 5.65 | 5.19 | 5.34 | 5.34 | 5.80 | 5.95 | 5.65 | 5.80 | 5.95 |
| 34 | <i>C. pinicolalis</i> (Current study, BARCP101)                   | 43   | 36   | 43   | 43   | 45   | 35   | 36   | 34   | -    | 0.31 | 1.22 | 0.31 | 0.15 | 0.15 | 0.15 | 0.31 | 0.46 | 0.31 | 0.46 | 0.15 | 6.57 | 6.72 | 6.41 | 6.57 | 6.72 |
| 35 | <i>C. pinicolalis</i> (Current study, BARCP102)                   | 44   | 36   | 44   | 44   | 46   | 35   | 38   | 36   | 2    | -    | 1.53 | 0.61 | 0.46 | 0.46 | 0.46 | 0.31 | 0.76 | 0.61 | 0.76 | 0.46 | 6.57 | 6.72 | 6.41 | 6.57 | 6.72 |
| 36 | <i>C. pinicolalis</i> (Current study, BARCP103)                   | 43   | 36   | 41   | 41   | 43   | 35   | 36   | 34   | 8    | 10   | -    | 1.22 | 1.37 | 1.37 | 1.37 | 1.22 | 1.68 | 1.53 | 1.37 | 1.37 | 6.11 | 6.26 | 5.95 | 6.11 | 6.26 |
| 37 | <i>C. pinicolalis</i> (Current study, BARCP104)                   | 43   | 38   | 43   | 43   | 45   | 37   | 38   | 36   | 2    | 4    | 8    | -    | 0.46 | 0.46 | 0.46 | 0.61 | 0.76 | 0.31 | 0.15 | 0.46 | 6.26 | 6.41 | 6.11 | 6.26 | 6.41 |
| 38 | <i>C. pinicolalis</i> (Current study, BARCP105)                   | 44   | 37   | 44   | 44   | 46   | 36   | 37   | 35   | 1    | 3    | 9    | 3    | -    | 0.31 | 0.31 | 0.46 | 0.61 | 0.46 | 0.61 | 0.31 | 6.72 | 6.87 | 6.57 | 6.72 | 6.87 |
| 39 | <i>C. pinicolalis</i> (Current study, BARCP106)                   | 42   | 35   | 42   | 42   | 44   | 34   | 35   | 33   | 1    | 3    | 9    | 3    | 2    | -    | 0.31 | 0.46 | 0.61 | 0.46 | 0.61 | 0.31 | 6.41 | 6.57 | 6.26 | 6.41 | 6.57 |
| 40 | <i>C. pinicolalis</i> (Current study, BARCP107)                   | 44   | 37   | 44   | 44   | 46   | 36   | 37   | 35   | 1    | 3    | 9    | 3    | 2    | 2    | -    | 0.46 | 0.61 | 0.46 | 0.61 | 0.31 | 6.72 | 6.87 | 6.57 | 6.72 | 6.87 |
| 41 | <i>C. pinicolalis</i> (Current study, BARCP108)                   | 42   | 36   | 42   | 42   | 44   | 35   | 36   | 34   | 2    | 2    | 8    | 4    | 3    | 3    | 3    | -    | 0.76 | 0.61 | 0.76 | 0.46 | 6.26 | 6.41 | 6.11 | 6.26 | 6.41 |
| 42 | <i>C. pinicolalis</i> (Current study, BARCP109)                   | 43   | 37   | 43   | 43   | 45   | 36   | 39   | 37   | 3    | 5    | 11   | 5    | 4    | 4    | 4    | 5    | -    | 0.76 | 0.92 | 0.61 | 6.72 | 6.87 | 6.57 | 6.72 | 6.87 |
| 43 | <i>C. pinicolalis</i> (Current study, BARCP110)                   | 43   | 36   | 43   | 43   | 45   | 35   | 36   | 34   | 2    | 4    | 10   | 2    | 3    | 3    | 3    | 4    | 5    | -    | 0.46 | 0.46 | 6.26 | 6.41 | 6.11 | 6.26 | 6.41 |
| 44 | <i>C. pinicolalis</i> (Current study, BARCP111)                   | 44   | 37   | 44   | 44   | 46   | 36   | 37   | 35   | 3    | 5    | 9    | 1    | 4    | 4    | 4    | 5    | 6    | 3    | -    | 0.61 | 6.41 | 6.57 | 6.26 | 6.41 | 6.57 |
| 45 | <i>C. pinicolalis</i> (Current study, BARCP112)                   | 44   | 37   | 44   | 44   | 46   | 36   | 37   | 35   | 1    | 3    | 9    | 3    | 2    | 2    | 2    | 3    | 4    | 3    | 4    | -    | 6.72 | 6.87 | 6.57 | 6.72 | 6.87 |
| 46 | <i>C. pluto</i> (Papua New Guinea, Autralia, BARCPL01)            | 41   | 41   | 39   | 41   | 41   | 40   | 41   | 38   | 43   | 43   | 40   | 41   | 44   | 42   | 44   | 41   | 44   | 41   | 42   | 44   | -    | 0.15 |      |      |      |

|    |                                                      |    |    |    |    |    |    |    |    |    |    |    |    |    |    |    |    |    |    |    |    |    |    |    |      |      |
|----|------------------------------------------------------|----|----|----|----|----|----|----|----|----|----|----|----|----|----|----|----|----|----|----|----|----|----|----|------|------|
| 48 | <i>C. pluto</i> (Australia, BARCPL03)                | 42 | 40 | 40 | 42 | 42 | 39 | 40 | 37 | 42 | 42 | 39 | 40 | 43 | 41 | 43 | 40 | 43 | 40 | 41 | 43 | 1  | 2  | -  | 0.46 | 0.31 |
| 49 | <i>C. pluto</i> (Australia, BARCPL04)                | 41 | 41 | 39 | 41 | 41 | 40 | 41 | 38 | 43 | 43 | 40 | 41 | 44 | 42 | 44 | 41 | 44 | 41 | 42 | 44 | 2  | 3  | 3  | -    | 0.46 |
| 50 | <i>C. pluto</i> (Australia, BARCPL05)                | 40 | 40 | 38 | 40 | 40 | 39 | 42 | 39 | 44 | 44 | 41 | 42 | 45 | 43 | 45 | 42 | 45 | 42 | 43 | 45 | 1  | 2  | 2  | 3    | -    |
| 51 | <i>C. semifascialis</i> (Papua New Guinea, BARCSE01) | 26 | 32 | 24 | 24 | 26 | 31 | 36 | 33 | 39 | 40 | 40 | 41 | 40 | 38 | 40 | 39 | 42 | 39 | 42 | 40 | 44 | 45 | 43 | 43   | 43   |
| 52 | <i>C. semifascialis</i> (Papua New Guinea, BARCSE02) | 26 | 30 | 24 | 24 | 26 | 29 | 38 | 35 | 39 | 40 | 40 | 41 | 40 | 38 | 40 | 39 | 40 | 39 | 42 | 40 | 42 | 43 | 41 | 41   | 41   |
| 53 | <i>C. semifascialis</i> (Papua New Guinea, BARCSE03) | 26 | 34 | 24 | 24 | 26 | 33 | 38 | 35 | 39 | 40 | 40 | 41 | 40 | 38 | 40 | 39 | 42 | 39 | 42 | 40 | 44 | 45 | 43 | 43   | 43   |
| 54 | <i>C. semifascialis</i> (Australia, BARCSE04)        | 27 | 33 | 25 | 25 | 27 | 32 | 37 | 34 | 40 | 41 | 41 | 42 | 41 | 39 | 41 | 40 | 43 | 40 | 43 | 41 | 43 | 44 | 42 | 42   | 42   |
| 55 | <i>C. semifascialis</i> (Australia, BARCSE05)        | 29 | 33 | 27 | 27 | 29 | 32 | 37 | 34 | 40 | 41 | 41 | 42 | 41 | 39 | 41 | 40 | 43 | 40 | 43 | 41 | 43 | 44 | 42 | 42   | 42   |
| 56 | <i>C. semifascialis</i> (Australia, BARCSE06)        | 30 | 0  | 28 | 28 | 30 | 1  | 18 | 17 | 36 | 36 | 36 | 38 | 37 | 35 | 37 | 36 | 37 | 36 | 37 | 37 | 41 | 42 | 40 | 41   | 40   |
| 57 | <i>C. semifascialis</i> (Australia, BARCSE07)        | 31 | 1  | 29 | 29 | 31 | 2  | 17 | 16 | 35 | 35 | 35 | 37 | 36 | 34 | 36 | 35 | 38 | 35 | 36 | 36 | 42 | 43 | 41 | 42   | 41   |
| 58 | <i>C. semifascialis</i> (Australia, BARCSE08)        | 30 | 2  | 28 | 28 | 30 | 1  | 16 | 15 | 34 | 34 | 34 | 36 | 35 | 33 | 35 | 34 | 37 | 34 | 35 | 35 | 41 | 42 | 40 | 41   | 40   |
| 59 | <i>C. tharsalea</i> (Australia, BARCTH01)            | 67 | 67 | 65 | 66 | 67 | 66 | 64 | 61 | 75 | 76 | 75 | 76 | 75 | 74 | 76 | 74 | 78 | 73 | 76 | 76 | 71 | 72 | 70 | 71   | 70   |
| 60 | <i>C. tharsalea</i> (Australia, BARCTH02)            | 70 | 70 | 68 | 69 | 70 | 69 | 67 | 64 | 76 | 77 | 76 | 76 | 77 | 77 | 77 | 75 | 79 | 74 | 77 | 77 | 74 | 75 | 73 | 74   | 73   |
| 61 | <i>C. tharsalea</i> (Australia, BARCTH03)            | 69 | 69 | 67 | 68 | 69 | 68 | 66 | 63 | 75 | 76 | 75 | 75 | 76 | 76 | 76 | 74 | 78 | 73 | 76 | 76 | 73 | 74 | 72 | 73   | 72   |
| 62 | <i>C. tharsalea</i> (Australia, BARCTH04)            | 68 | 68 | 66 | 67 | 68 | 67 | 65 | 62 | 74 | 75 | 74 | 74 | 75 | 75 | 75 | 73 | 77 | 72 | 75 | 75 | 72 | 73 | 71 | 72   | 71   |
| 63 | <i>C. ersealis</i> (Australia, BARCER01)             | 49 | 47 | 47 | 49 | 49 | 48 | 54 | 52 | 49 | 50 | 47 | 47 | 50 | 48 | 50 | 48 | 52 | 47 | 47 | 50 | 48 | 49 | 49 | 50   | 47   |
| 64 | <i>C. ersealis</i> (Australia, BARCER02)             | 47 | 45 | 45 | 47 | 47 | 46 | 52 | 50 | 47 | 48 | 45 | 45 | 48 | 46 | 48 | 46 | 50 | 45 | 45 | 48 | 46 | 47 | 47 | 48   | 45   |
| 65 | <i>C. diminutiva</i> (Australia, BARCDI01)           | 57 | 51 | 55 | 55 | 57 | 52 | 56 | 54 | 51 | 52 | 49 | 49 | 52 | 52 | 52 | 52 | 54 | 49 | 49 | 50 | 55 | 56 | 54 | 57   | 54   |
| 66 | <i>C. haemactalis</i> (Australia, BARCHA01)          | 64 | 62 | 62 | 62 | 64 | 61 | 63 | 61 | 61 | 63 | 60 | 61 | 62 | 60 | 62 | 62 | 64 | 59 | 60 | 62 | 66 | 67 | 65 | 64   | 66   |
| 67 | <i>C. evaxalis</i> (Australia, BARCEV01)             | 62 | 56 | 60 | 62 | 61 | 55 | 60 | 58 | 59 | 59 | 59 | 59 | 60 | 58 | 60 | 58 | 62 | 61 | 59 | 60 | 61 | 62 | 60 | 63   | 61   |
| 68 | <i>C. evaxalis</i> (Australia, BARCEV02)             | 63 | 55 | 61 | 63 | 62 | 54 | 59 | 57 | 60 | 60 | 58 | 60 | 61 | 59 | 61 | 59 | 63 | 62 | 60 | 61 | 62 | 63 | 61 | 64   | 62   |
| 69 | <i>C. evaxalis</i> (Australia, BARCEV03)             | 67 | 51 | 65 | 65 | 66 | 50 | 53 | 51 | 53 | 53 | 55 | 55 | 54 | 52 | 54 | 52 | 56 | 55 | 55 | 54 | 64 | 65 | 63 | 64   | 64   |
| 70 | <i>C. pandamalis</i> (Malaysia, BARCPA01)            | 45 | 38 | 45 | 47 | 47 | 37 | 40 | 39 | 35 | 37 | 32 | 35 | 36 | 34 | 36 | 37 | 38 | 35 | 36 | 36 | 39 | 40 | 38 | 39   | 40   |

|    |                                                                   | 51   | 52   | 53   | 54   | 55   | 56   | 57   | 58   | 59    | 60    | 61    | 62    | 63   | 64   | 65   | 66    | 67   | 68   | 69    | 70   |
|----|-------------------------------------------------------------------|------|------|------|------|------|------|------|------|-------|-------|-------|-------|------|------|------|-------|------|------|-------|------|
| 1  | <i>C. punctiferalis</i> (Current study, BARCPU01)                 | 5.19 | 5.50 | 5.50 | 5.34 | 5.34 | 2.44 | 2.29 | 2.14 | 10.08 | 10.53 | 10.38 | 10.23 | 7.79 | 7.48 | 7.79 | 9.62  | 8.70 | 8.55 | 7.94  | 5.80 |
| 2  | <i>C. punctiferalis</i> (Current study, China, Thailand BARCPU02) | 5.34 | 5.65 | 5.65 | 5.50 | 5.50 | 2.60 | 2.44 | 2.29 | 9.62  | 10.08 | 9.92  | 9.77  | 8.09 | 7.79 | 8.40 | 9.62  | 9.01 | 8.86 | 7.94  | 5.95 |
| 3  | <i>C. punctiferalis</i> (Current study, BARCPU03)                 | 5.34 | 5.65 | 5.65 | 5.50 | 5.50 | 2.44 | 2.29 | 2.14 | 9.77  | 10.23 | 10.08 | 9.92  | 8.24 | 7.94 | 8.24 | 9.62  | 9.01 | 8.86 | 7.94  | 5.80 |
| 4  | <i>C. punctiferalis</i> (Current study, BARCPU04)                 | 5.04 | 5.34 | 5.34 | 5.19 | 5.19 | 2.44 | 2.29 | 2.14 | 9.77  | 10.23 | 10.08 | 9.92  | 8.09 | 7.79 | 8.09 | 9.31  | 8.86 | 8.70 | 7.79  | 5.80 |
| 5  | <i>C. punctiferalis</i> (Current study, BARCPU05)                 | 5.50 | 5.80 | 5.80 | 5.65 | 5.65 | 2.75 | 2.60 | 2.44 | 9.62  | 10.08 | 9.92  | 9.77  | 8.24 | 7.94 | 8.24 | 9.62  | 9.16 | 9.01 | 8.09  | 5.80 |
| 6  | <i>C. punctiferalis</i> (Current study, BARCPU06)                 | 5.34 | 5.65 | 5.65 | 5.50 | 5.50 | 2.44 | 2.29 | 2.14 | 9.62  | 10.08 | 9.92  | 9.77  | 8.09 | 7.79 | 8.40 | 9.77  | 8.86 | 8.70 | 7.79  | 6.11 |
| 7  | <i>C. punctiferalis</i> (Current study, BARCPU07)                 | 5.50 | 5.80 | 5.80 | 5.65 | 5.65 | 2.60 | 2.44 | 2.29 | 9.92  | 10.38 | 10.23 | 10.08 | 8.24 | 7.94 | 8.24 | 9.77  | 9.01 | 8.86 | 8.09  | 5.80 |
| 8  | <i>C. punctiferalis</i> (Current study, BARCPU08)                 | 5.50 | 5.80 | 5.80 | 5.65 | 5.65 | 2.75 | 2.60 | 2.44 | 9.77  | 10.23 | 10.08 | 9.92  | 8.24 | 7.94 | 8.55 | 9.77  | 9.16 | 9.01 | 8.09  | 5.80 |
| 9  | <i>C. punctiferalis</i> (Current study, BARCPU09)                 | 5.19 | 5.50 | 5.50 | 5.34 | 5.34 | 2.44 | 2.29 | 2.14 | 9.47  | 9.92  | 9.77  | 9.62  | 7.94 | 7.63 | 8.24 | 9.47  | 8.86 | 8.70 | 7.79  | 5.80 |
| 10 | <i>C. punctiferalis</i> (Current study, China, BARCPU10)          | 5.19 | 5.50 | 5.50 | 5.34 | 5.34 | 2.44 | 2.29 | 2.14 | 9.47  | 9.92  | 9.77  | 9.62  | 7.94 | 7.63 | 8.24 | 9.47  | 8.86 | 8.70 | 7.79  | 5.80 |
| 11 | <i>C. punctiferalis</i> (Current study, BARCPU11)                 | 5.50 | 5.80 | 5.80 | 5.65 | 5.65 | 3.05 | 2.90 | 2.75 | 9.16  | 9.62  | 9.47  | 9.31  | 8.55 | 8.24 | 8.86 | 10.08 | 9.47 | 9.31 | 8.40  | 6.41 |
| 12 | <i>C. punctiferalis</i> (Current study, BARCPU12)                 | 5.04 | 5.34 | 5.34 | 5.19 | 5.19 | 2.29 | 2.14 | 1.99 | 9.92  | 10.38 | 10.23 | 10.08 | 7.63 | 7.33 | 7.63 | 9.47  | 8.55 | 8.40 | 7.79  | 5.65 |
| 13 | <i>C. punctiferalis</i> (Current study, BARCPU13)                 | 5.34 | 5.65 | 5.65 | 5.50 | 5.50 | 2.60 | 2.44 | 2.29 | 9.62  | 10.08 | 9.92  | 9.77  | 8.09 | 7.79 | 8.40 | 9.62  | 9.01 | 8.86 | 7.94  | 5.95 |
| 14 | <i>C. punctiferalis</i> (Current study, BARCPU14)                 | 5.50 | 5.80 | 5.80 | 5.65 | 5.65 | 2.75 | 2.60 | 2.44 | 9.77  | 10.23 | 10.08 | 9.92  | 8.24 | 7.94 | 8.55 | 9.77  | 9.16 | 9.01 | 8.09  | 6.11 |
| 15 | <i>C. punctiferalis</i> (Current study, BARCPU15)                 | 5.50 | 5.80 | 5.80 | 5.65 | 5.65 | 2.75 | 2.60 | 2.44 | 9.77  | 10.23 | 10.08 | 9.92  | 8.24 | 7.94 | 8.55 | 9.77  | 9.16 | 9.01 | 8.09  | 6.11 |
| 16 | <i>C. punctiferalis</i> (Korea, BARCPU16)                         | 5.50 | 5.80 | 5.80 | 5.65 | 5.65 | 2.75 | 2.60 | 2.44 | 9.77  | 10.23 | 10.08 | 9.92  | 8.24 | 7.94 | 8.55 | 9.77  | 9.16 | 9.01 | 8.09  | 6.11 |
| 17 | <i>C. punctiferalis</i> (China, BARCPU17)                         | 5.19 | 5.50 | 5.50 | 5.34 | 5.34 | 2.60 | 2.44 | 2.29 | 9.92  | 10.38 | 10.23 | 10.08 | 8.40 | 8.09 | 8.40 | 9.77  | 9.16 | 9.01 | 8.09  | 5.95 |
| 18 | <i>C. punctiferalis</i> (China, BARCPU18)                         | 5.50 | 5.80 | 5.80 | 5.65 | 5.65 | 2.75 | 2.60 | 2.44 | 9.47  | 9.92  | 9.77  | 9.62  | 7.94 | 7.63 | 8.24 | 9.47  | 9.16 | 9.01 | 8.09  | 6.11 |
| 19 | <i>C. punctiferalis</i> (Pakistan, BARCPU19)                      | 5.19 | 5.50 | 5.50 | 5.34 | 5.34 | 2.60 | 2.44 | 2.29 | 9.92  | 10.38 | 10.23 | 10.08 | 7.63 | 7.33 | 7.94 | 9.62  | 8.70 | 8.55 | 7.94  | 5.95 |
| 20 | <i>C. punctiferalis</i> (Pakistan, BARCPU20)                      | 5.50 | 5.80 | 5.80 | 5.65 | 5.65 | 2.75 | 2.60 | 2.44 | 9.77  | 10.23 | 10.08 | 9.92  | 8.24 | 7.94 | 8.55 | 9.77  | 9.16 | 9.01 | 8.09  | 6.11 |
| 21 | <i>C. punctiferalis</i> (Pakistan, BARCPU21)                      | 5.50 | 5.80 | 5.80 | 5.65 | 5.65 | 2.44 | 2.29 | 2.14 | 9.77  | 10.23 | 10.08 | 9.92  | 7.94 | 7.63 | 8.55 | 9.47  | 8.86 | 8.70 | 7.79  | 5.80 |
| 22 | <i>C. punctiferalis</i> (Australia, BARCPU22)                     | 3.82 | 3.82 | 3.82 | 3.97 | 4.28 | 4.43 | 4.58 | 4.43 | 10.08 | 10.53 | 10.38 | 10.23 | 7.33 | 7.02 | 8.55 | 9.62  | 9.31 | 9.47 | 10.08 | 7.02 |
| 23 | <i>C. punctiferalis</i> (Australia, BARCPU23)                     | 3.97 | 3.97 | 3.97 | 4.12 | 4.43 | 4.58 | 4.73 | 4.58 | 10.23 | 10.69 | 10.53 | 10.38 | 7.48 | 7.18 | 8.70 | 9.77  | 9.47 | 9.62 | 10.23 | 7.18 |
| 24 | <i>C. punctiferalis</i> (Australia, BARCPU24)                     | 3.97 | 3.97 | 3.97 | 4.12 | 4.43 | 4.28 | 4.43 | 4.28 | 10.08 | 10.53 | 10.38 | 10.23 | 7.48 | 7.18 | 8.70 | 9.77  | 9.16 | 9.31 | 9.92  | 7.18 |
| 25 | <i>C. punctiferalis</i> (Australia, BARCPU25)                     | 3.82 | 3.82 | 3.82 | 3.97 | 4.28 | 4.43 | 4.58 | 4.43 | 10.08 | 10.53 | 10.38 | 10.23 | 7.33 | 7.02 | 8.55 | 9.92  | 9.31 | 9.47 | 10.08 | 7.02 |
| 26 | <i>C. punctiferalis</i> (Australia, BARCPU26)                     | 3.97 | 3.97 | 3.97 | 4.12 | 4.43 | 4.58 | 4.73 | 4.58 | 10.23 | 10.69 | 10.53 | 10.38 | 7.48 | 7.18 | 8.70 | 9.77  | 9.47 | 9.62 | 10.23 | 6.87 |
| 27 | <i>C. punctiferalis</i> (Australia, BARCPU27)                     | 4.89 | 4.58 | 5.19 | 5.04 | 5.04 | 0.00 | 0.15 | 0.31 | 10.23 | 10.69 | 10.53 | 10.38 | 7.18 | 6.87 | 7.79 | 9.47  | 8.55 | 8.40 | 7.79  | 5.80 |
| 28 | <i>C. punctiferalis</i> (Australia, BARCPU28)                     | 3.66 | 3.66 | 3.66 | 3.82 | 4.12 | 4.28 | 4.43 | 4.28 | 9.92  | 10.38 | 10.23 | 10.08 | 7.18 | 6.87 | 8.40 | 9.47  | 9.16 | 9.31 | 9.92  | 6.87 |
| 29 | <i>C. punctiferalis</i> (Australia, BARCPU29)                     | 3.66 | 3.66 | 3.66 | 3.82 | 4.12 | 4.28 | 4.43 | 4.28 | 10.08 | 10.53 | 10.38 | 10.23 | 7.48 | 7.18 | 8.40 | 9.47  | 9.47 | 9.62 | 9.92  | 7.18 |
| 30 | <i>C. punctiferalis</i> (Australia, BARCPU30)                     | 3.97 | 3.97 | 3.97 | 4.12 | 4.43 | 4.58 | 4.73 | 4.58 | 10.23 | 10.69 | 10.53 | 10.38 | 7.48 | 7.18 | 8.70 | 9.77  | 9.31 | 9.47 | 10.08 | 7.18 |
| 31 | <i>C. punctiferalis</i> (Australia, BARCPU31)                     | 4.73 | 4.43 | 5.04 | 4.89 | 4.89 | 0.15 | 0.31 | 0.15 | 10.08 | 10.53 | 10.38 | 10.23 | 7.33 | 7.02 | 7.94 | 9.31  | 8.40 | 8.24 | 7.63  | 5.65 |
| 32 | <i>C. punctiferalis</i> (Japan, BARCPU32)                         | 5.50 | 5.80 | 5.80 | 5.65 | 5.65 | 2.75 | 2.60 | 2.44 | 9.77  | 10.23 | 10.08 | 9.92  | 8.24 | 7.94 | 8.55 | 9.62  | 9.16 | 9.01 | 8.09  | 6.11 |
| 33 | <i>C. punctiferalis</i> (Thailand, BARCPU33)                      | 5.04 | 5.34 | 5.34 | 5.19 | 5.19 | 2.60 | 2.44 | 2.29 | 9.31  | 9.77  | 9.62  | 9.47  | 7.94 | 7.63 | 8.24 | 9.31  | 8.86 | 8.70 | 7.79  | 5.95 |
| 34 | <i>C. pinicolalis</i> (Current study, BARCPI01)                   | 5.95 | 5.95 | 5.95 | 6.11 | 6.11 | 5.50 | 5.34 | 5.19 | 11.45 | 11.60 | 11.45 | 11.30 | 7.48 | 7.18 | 7.79 | 9.31  | 9.01 | 9.16 | 8.09  | 5.34 |
| 35 | <i>C. pinicolalis</i> (Current study, BARCPI02)                   | 6.11 | 6.11 | 6.11 | 6.26 | 6.26 | 5.50 | 5.34 | 5.19 | 11.60 | 11.76 | 11.60 | 11.45 | 7.63 | 7.33 | 7.94 | 9.62  | 9.01 | 9.16 | 8.09  | 5.65 |

|    |                                                        |      |      |      |      |      |      |      |      |       |       |       |       |       |       |       |       |       |       |       |       |
|----|--------------------------------------------------------|------|------|------|------|------|------|------|------|-------|-------|-------|-------|-------|-------|-------|-------|-------|-------|-------|-------|
| 36 | <i>C. pinicolalis</i> (Current study, BARCPI03)        | 6.11 | 6.11 | 6.11 | 6.26 | 6.26 | 5.50 | 5.34 | 5.19 | 11.45 | 11.60 | 11.45 | 11.30 | 7.18  | 6.87  | 7.48  | 9.16  | 9.01  | 8.86  | 8.40  | 4.89  |
| 37 | <i>C. pinicolalis</i> (Current study, BARCPI04)        | 6.26 | 6.26 | 6.26 | 6.41 | 6.41 | 5.80 | 5.65 | 5.50 | 11.45 | 11.60 | 11.45 | 11.30 | 7.18  | 6.87  | 7.48  | 9.31  | 9.01  | 9.16  | 8.40  | 5.34  |
| 38 | <i>C. pinicolalis</i> (Current study, BARCPI05)        | 6.11 | 6.11 | 6.11 | 6.26 | 6.26 | 5.65 | 5.50 | 5.34 | 11.60 | 11.76 | 11.60 | 11.45 | 7.63  | 7.33  | 7.94  | 9.47  | 9.16  | 9.31  | 8.24  | 5.50  |
| 39 | <i>C. pinicolalis</i> (Current study, BARCPI06)        | 5.80 | 5.80 | 5.80 | 5.95 | 5.95 | 5.34 | 5.19 | 5.04 | 11.30 | 11.76 | 11.60 | 11.45 | 7.33  | 7.02  | 7.94  | 9.16  | 8.86  | 9.01  | 7.94  | 5.19  |
| 40 | <i>C. pinicolalis</i> (Current study, BARCPI07)        | 6.11 | 6.11 | 6.11 | 6.26 | 6.26 | 5.65 | 5.50 | 5.34 | 11.60 | 11.76 | 11.60 | 11.45 | 7.63  | 7.33  | 7.94  | 9.47  | 9.16  | 9.31  | 8.24  | 5.50  |
| 41 | <i>C. pinicolalis</i> (Current study, BARCPI08)        | 5.95 | 5.95 | 5.95 | 6.11 | 6.11 | 5.50 | 5.34 | 5.19 | 11.30 | 11.45 | 11.30 | 11.15 | 7.33  | 7.02  | 7.94  | 9.47  | 8.86  | 9.01  | 7.94  | 5.65  |
| 42 | <i>C. pinicolalis</i> (Current study, BARCPI09)        | 6.41 | 6.11 | 6.41 | 6.57 | 6.57 | 5.65 | 5.80 | 5.65 | 11.91 | 12.06 | 11.91 | 11.76 | 7.94  | 7.63  | 8.24  | 9.77  | 9.47  | 9.62  | 8.55  | 5.80  |
| 43 | <i>C. pinicolalis</i> (Current study, BARCPI10)        | 5.95 | 5.95 | 5.95 | 6.11 | 6.11 | 5.50 | 5.34 | 5.19 | 11.15 | 11.30 | 11.15 | 10.99 | 7.18  | 6.87  | 7.48  | 9.01  | 9.31  | 9.47  | 8.40  | 5.34  |
| 44 | <i>C. pinicolalis</i> (Current study, BARCPI11)        | 6.41 | 6.41 | 6.41 | 6.57 | 6.57 | 5.65 | 5.50 | 5.34 | 11.60 | 11.76 | 11.60 | 11.45 | 7.18  | 6.87  | 7.48  | 9.16  | 9.01  | 9.16  | 8.40  | 5.50  |
| 45 | <i>C. pinicolalis</i> (Current study, BARCPI12)        | 6.11 | 6.11 | 6.11 | 6.26 | 6.26 | 5.65 | 5.50 | 5.34 | 11.60 | 11.76 | 11.60 | 11.45 | 7.63  | 7.33  | 7.63  | 9.47  | 9.16  | 9.31  | 8.24  | 5.50  |
| 46 | <i>C. pluto</i> (Papua New Guinea, Autralia, BARCPL01) | 6.72 | 6.41 | 6.72 | 6.57 | 6.57 | 6.26 | 6.41 | 6.26 | 10.84 | 11.30 | 11.15 | 10.99 | 7.33  | 7.02  | 8.40  | 10.08 | 9.31  | 9.47  | 9.77  | 5.95  |
| 47 | <i>C. pluto</i> (Australia, BARCPL02)                  | 6.87 | 6.57 | 6.87 | 6.72 | 6.72 | 6.41 | 6.57 | 6.41 | 10.99 | 11.45 | 11.30 | 11.15 | 7.48  | 7.18  | 8.55  | 10.23 | 9.47  | 9.62  | 9.92  | 6.11  |
| 48 | <i>C. pluto</i> (Australia, BARCPL03)                  | 6.57 | 6.26 | 6.57 | 6.41 | 6.41 | 6.11 | 6.26 | 6.11 | 10.69 | 11.15 | 10.99 | 10.84 | 7.48  | 7.18  | 8.24  | 9.92  | 9.16  | 9.31  | 9.62  | 5.80  |
| 49 | <i>C. pluto</i> (Australia, BARCPL04)                  | 6.57 | 6.26 | 6.57 | 6.41 | 6.41 | 6.26 | 6.41 | 6.26 | 10.84 | 11.30 | 11.15 | 10.99 | 7.63  | 7.33  | 8.70  | 9.77  | 9.62  | 9.77  | 9.77  | 5.95  |
| 50 | <i>C. pluto</i> (Australia, BARCPL05)                  | 6.57 | 6.26 | 6.57 | 6.41 | 6.41 | 6.11 | 6.26 | 6.11 | 10.69 | 11.15 | 10.99 | 10.84 | 7.18  | 6.87  | 8.24  | 10.08 | 9.31  | 9.47  | 9.77  | 6.11  |
| 51 | <i>C. semifascialis</i> (Papua New Guinea, BARCSE01)   | -    | 0.31 | 0.31 | 0.15 | 0.46 | 4.89 | 4.73 | 4.58 | 10.53 | 10.99 | 10.84 | 10.69 | 8.70  | 8.40  | 9.16  | 9.01  | 9.62  | 9.77  | 9.47  | 7.02  |
| 52 | <i>C. semifascialis</i> (Papua New Guinea, BARCSE02)   | 2    | -    | 0.61 | 0.46 | 0.76 | 4.58 | 4.73 | 4.58 | 10.53 | 10.99 | 10.84 | 10.69 | 8.70  | 8.40  | 9.16  | 9.01  | 9.62  | 9.77  | 9.47  | 7.02  |
| 53 | <i>C. semifascialis</i> (Papua New Guinea, BARCSE03)   | 2    | 4    | -    | 0.46 | 0.76 | 5.19 | 5.04 | 4.89 | 10.53 | 10.99 | 10.84 | 10.69 | 8.70  | 8.40  | 9.16  | 9.16  | 9.77  | 9.92  | 9.62  | 7.02  |
| 54 | <i>C. semifascialis</i> (Australia, BARCSE04)          | 1    | 3    | 3    | -    | 0.31 | 5.04 | 4.89 | 4.73 | 10.69 | 11.15 | 10.99 | 10.84 | 8.86  | 8.55  | 9.31  | 9.16  | 9.77  | 9.92  | 9.62  | 6.87  |
| 55 | <i>C. semifascialis</i> (Australia, BARCSE05)          | 3    | 5    | 5    | 2    | -    | 5.04 | 4.89 | 4.73 | 10.99 | 11.45 | 11.30 | 11.15 | 8.86  | 8.55  | 9.31  | 9.16  | 9.77  | 9.92  | 9.62  | 6.87  |
| 56 | <i>C. semifascialis</i> (Australia, BARCSE06)          | 32   | 30   | 34   | 33   | 33   | -    | 0.15 | 0.31 | 10.23 | 10.69 | 10.53 | 10.38 | 7.18  | 6.87  | 7.79  | 9.47  | 8.55  | 8.40  | 7.79  | 5.80  |
| 57 | <i>C. semifascialis</i> (Australia, BARCSE07)          | 31   | 31   | 33   | 32   | 32   | 1    | -    | 0.15 | 10.08 | 10.53 | 10.38 | 10.23 | 7.02  | 6.72  | 7.63  | 9.31  | 8.40  | 8.24  | 7.63  | 5.65  |
| 58 | <i>C. semifascialis</i> (Australia, BARCSE08)          | 30   | 30   | 32   | 31   | 31   | 2    | 1    | -    | 9.92  | 10.38 | 10.23 | 10.08 | 7.18  | 6.87  | 7.79  | 9.16  | 8.24  | 8.09  | 7.48  | 5.50  |
| 59 | <i>C. tharsalea</i> (Australia, BARCTH01)              | 69   | 69   | 69   | 70   | 72   | 67   | 66   | 65   | -     | 0.61  | 0.61  | 0.15  | 11.30 | 11.15 | 12.06 | 10.99 | 11.60 | 11.76 | 11.60 | 11.60 |
| 60 | <i>C. tharsalea</i> (Australia, BARCTH02)              | 72   | 72   | 72   | 73   | 75   | 70   | 69   | 68   | 4     | -     | 0.31  | 0.46  | 11.60 | 11.45 | 12.06 | 11.60 | 11.76 | 11.91 | 11.91 | 12.06 |
| 61 | <i>C. tharsalea</i> (Australia, BARCTH03)              | 71   | 71   | 71   | 72   | 74   | 69   | 68   | 67   | 4     | 2     | -     | 0.46  | 11.60 | 11.15 | 11.76 | 11.60 | 11.91 | 12.06 | 11.91 | 11.91 |
| 62 | <i>C. tharsalea</i> (Australia, BARCTH04)              | 70   | 70   | 70   | 71   | 73   | 68   | 67   | 66   | 1     | 3     | 3     | -     | 11.45 | 11.30 | 11.91 | 11.15 | 11.76 | 11.91 | 11.76 | 11.76 |
| 63 | <i>C. ersealis</i> (Australia, BARCER01)               | 57   | 57   | 57   | 58   | 58   | 47   | 46   | 47   | 74    | 76    | 76    | 75    | -     | 0.46  | 3.05  | 8.86  | 9.31  | 9.31  | 9.47  | 8.24  |
| 64 | <i>C. ersealis</i> (Australia, BARCER02)               | 55   | 55   | 55   | 56   | 56   | 45   | 44   | 45   | 73    | 75    | 73    | 74    | 3     | -     | 2.60  | 8.70  | 9.16  | 9.16  | 9.31  | 7.94  |
| 65 | <i>C. diminutiva</i> (Australia, BARCDI01)             | 60   | 60   | 60   | 61   | 61   | 51   | 50   | 51   | 79    | 79    | 77    | 78    | 20    | 17    | -     | 9.62  | 10.69 | 10.69 | 10.23 | 8.40  |
| 66 | <i>C. haemactalis</i> (Australia, BARCHA01)            | 59   | 59   | 60   | 60   | 60   | 62   | 61   | 60   | 72    | 76    | 76    | 73    | 58    | 57    | 63    | -     | 9.47  | 9.62  | 9.31  | 10.23 |
| 67 | <i>C. evaxalis</i> (Australia, BARCEV01)               | 63   | 63   | 64   | 64   | 64   | 56   | 55   | 54   | 76    | 77    | 78    | 77    | 61    | 60    | 70    | 62    | -     | 0.15  | 1.83  | 9.62  |
| 68 | <i>C. evaxalis</i> (Australia, BARCEV02)               | 64   | 64   | 65   | 65   | 65   | 55   | 54   | 53   | 77    | 78    | 79    | 78    | 61    | 60    | 70    | 63    | 1     | -     | 1.68  | 9.47  |
| 69 | <i>C. evaxalis</i> (Australia, BARCEV03)               | 62   | 62   | 63   | 63   | 63   | 51   | 50   | 49   | 76    | 78    | 78    | 77    | 62    | 61    | 67    | 61    | 12    | 11    | -     | 9.47  |
| 70 | <i>C. pandamalis</i> (Malaysia, BARCPA01)              | 46   | 46   | 46   | 45   | 45   | 38   | 37   | 36   | 76    | 79    | 78    | 77    | 54    | 52    | 55    | 67    | 63    | 62    | 62    | -     |

**Table S5.** Pairwise comparisons of *EF1a* haplotypes of *Conogethes pinicollis* and *C. punctiferalis*

|    |           | 1 | 2    | 3    | 4    | 5    | 6    | 7    | 8    | 9    | 10   | 11   | 12   | 13   | 14   | 15   | 16   | 17   | 18   | 19   | 20   | 21   | 22   | 23   | 24   | 25   | 26   | 27   | 28   | 29   | 30   |      |
|----|-----------|---|------|------|------|------|------|------|------|------|------|------|------|------|------|------|------|------|------|------|------|------|------|------|------|------|------|------|------|------|------|------|
| 1  | EF1ACPU01 | - | 0.13 | 0.25 | 0.13 | 0.13 | 0.76 | 0.25 | 0.25 | 0.38 | 0.13 | 0.64 | 0.76 | 0.13 | 0.25 | 0.25 | 0.13 | 0.13 | 0.13 | 0.25 | 0.51 | 0.64 | 0.13 | 0.13 | 0.38 | 0.13 | 0.25 | 0.25 | 0.25 | 0.13 |      |      |
| 2  | EF1ACPU02 | 1 | -    | 0.38 | 0.25 | 0.25 | 0.89 | 0.38 | 0.38 | 0.51 | 0.25 | 0.76 | 0.89 | 0.25 | 0.38 | 0.38 | 0.25 | 0.25 | 0.38 | 0.64 | 0.76 | 0.25 | 0.25 | 0.25 | 0.51 | 0.25 | 0.38 | 0.38 | 0.38 | 0.38 | 0.25 |      |
| 3  | EF1ACPU03 | 2 | 3    | -    | 0.38 | 0.38 | 1.02 | 0.51 | 0.51 | 0.64 | 0.38 | 0.89 | 1.02 | 0.38 | 0.51 | 0.51 | 0.38 | 0.38 | 0.38 | 0.51 | 0.76 | 0.89 | 0.38 | 0.38 | 0.38 | 0.38 | 0.51 | 0.51 | 0.51 | 0.51 | 0.38 |      |
| 4  | EF1ACPU04 | 1 | 2    | 3    | -    | 0.25 | 0.89 | 0.38 | 0.38 | 0.51 | 0.25 | 0.76 | 0.89 | 0.25 | 0.38 | 0.38 | 0.25 | 0.25 | 0.25 | 0.38 | 0.64 | 0.76 | 0.25 | 0.25 | 0.51 | 0.25 | 0.38 | 0.38 | 0.38 | 0.38 | 0.25 |      |
| 5  | EF1ACPU05 | 1 | 2    | 3    | 2    | -    | 0.89 | 0.38 | 0.38 | 0.51 | 0.25 | 0.76 | 0.89 | 0.25 | 0.38 | 0.38 | 0.25 | 0.25 | 0.25 | 0.38 | 0.64 | 0.76 | 0.25 | 0.25 | 0.51 | 0.25 | 0.38 | 0.38 | 0.38 | 0.38 | 0.25 |      |
| 6  | EF1ACPU06 | 6 | 7    | 8    | 7    | 7    | -    | 0.76 | 0.76 | 0.89 | 0.89 | 0.89 | 1.27 | 0.89 | 0.76 | 0.76 | 0.89 | 0.89 | 0.89 | 0.76 | 1.27 | 1.40 | 0.89 | 0.89 | 1.14 | 0.89 | 1.02 | 1.02 | 1.02 | 1.02 | 0.89 |      |
| 7  | EF1ACPU07 | 2 | 3    | 4    | 3    | 3    | 6    | -    | 0.25 | 0.38 | 0.38 | 0.89 | 1.02 | 0.38 | 0.51 | 0.51 | 0.38 | 0.38 | 0.38 | 0.51 | 0.76 | 0.89 | 0.38 | 0.38 | 0.64 | 0.38 | 0.51 | 0.51 | 0.51 | 0.51 | 0.38 |      |
| 8  | EF1ACPU08 | 2 | 3    | 4    | 3    | 3    | 6    | 2    | -    | 0.38 | 0.38 | 0.89 | 1.02 | 0.38 | 0.51 | 0.51 | 0.38 | 0.38 | 0.38 | 0.51 | 0.76 | 0.89 | 0.38 | 0.38 | 0.64 | 0.38 | 0.51 | 0.51 | 0.51 | 0.51 | 0.38 |      |
| 9  | EF1ACPU09 | 3 | 4    | 5    | 4    | 4    | 7    | 3    | 3    | -    | 0.51 | 1.02 | 1.14 | 0.51 | 0.64 | 0.64 | 0.51 | 0.51 | 0.51 | 0.64 | 0.89 | 1.02 | 0.51 | 0.51 | 0.76 | 0.51 | 0.64 | 0.64 | 0.64 | 0.64 | 0.51 |      |
| 10 | EF1ACPU10 | 1 | 2    | 3    | 2    | 2    | 7    | 3    | 3    | 4    | -    | 0.76 | 0.64 | 0.25 | 0.38 | 0.38 | 0.25 | 0.25 | 0.25 | 0.38 | 0.64 | 0.76 | 0.25 | 0.25 | 0.51 | 0.25 | 0.38 | 0.38 | 0.38 | 0.38 | 0.25 |      |
| 11 | EF1ACPU11 | 5 | 6    | 7    | 6    | 6    | 7    | 7    | 7    | 8    | 6    | -    | 1.14 | 0.76 | 0.64 | 0.64 | 0.76 | 0.76 | 0.76 | 0.64 | 1.14 | 0.76 | 0.76 | 0.76 | 1.02 | 0.76 | 0.89 | 0.89 | 0.89 | 0.89 | 0.76 |      |
| 12 | EF1ACPU12 | 6 | 7    | 8    | 7    | 7    | 10   | 8    | 8    | 9    | 5    | 9    | -    | 0.89 | 0.76 | 0.76 | 0.89 | 0.89 | 0.89 | 0.76 | 1.27 | 1.40 | 0.89 | 0.89 | 1.14 | 0.89 | 1.02 | 1.02 | 1.02 | 1.02 | 0.89 |      |
| 13 | EF1ACPU13 | 1 | 2    | 3    | 2    | 2    | 7    | 3    | 3    | 4    | 2    | 6    | 7    | -    | 0.38 | 0.38 | 0.25 | 0.25 | 0.25 | 0.38 | 0.64 | 0.76 | 0.25 | 0.25 | 0.51 | 0.25 | 0.38 | 0.38 | 0.38 | 0.38 | 0.25 |      |
| 14 | EF1ACPU14 | 2 | 3    | 4    | 3    | 3    | 6    | 4    | 4    | 5    | 3    | 5    | 6    | 3    | -    | 0.25 | 0.38 | 0.38 | 0.38 | 0.25 | 0.76 | 0.89 | 0.38 | 0.38 | 0.64 | 0.38 | 0.51 | 0.51 | 0.51 | 0.51 | 0.38 |      |
| 15 | EF1ACPU15 | 2 | 3    | 4    | 3    | 3    | 6    | 4    | 4    | 5    | 3    | 5    | 6    | 3    | 2    | -    | 0.38 | 0.38 | 0.38 | 0.25 | 0.76 | 0.89 | 0.38 | 0.38 | 0.64 | 0.38 | 0.51 | 0.51 | 0.51 | 0.51 | 0.38 |      |
| 16 | EF1ACPU16 | 1 | 2    | 3    | 2    | 2    | 7    | 3    | 3    | 4    | 2    | 6    | 7    | 2    | 3    | 3    | -    | 0.25 | 0.25 | 0.38 | 0.64 | 0.76 | 0.25 | 0.25 | 0.51 | 0.25 | 0.38 | 0.38 | 0.38 | 0.38 | 0.25 |      |
| 17 | EF1ACPU17 | 1 | 2    | 3    | 2    | 2    | 7    | 3    | 3    | 4    | 2    | 6    | 7    | 2    | 3    | 3    | 2    | -    | 0.25 | 0.38 | 0.64 | 0.76 | 0.25 | 0.25 | 0.51 | 0.25 | 0.38 | 0.38 | 0.38 | 0.38 | 0.25 |      |
| 18 | EF1ACPU18 | 1 | 2    | 3    | 2    | 2    | 7    | 3    | 3    | 4    | 2    | 6    | 7    | 2    | 3    | 3    | 2    | 2    | -    | 0.38 | 0.64 | 0.76 | 0.25 | 0.25 | 0.51 | 0.25 | 0.38 | 0.38 | 0.38 | 0.38 | 0.25 |      |
| 19 | EF1ACPU19 | 2 | 3    | 4    | 3    | 3    | 6    | 4    | 4    | 5    | 3    | 5    | 6    | 3    | 2    | 2    | 3    | 3    | 3    | -    | 0.76 | 0.89 | 0.38 | 0.38 | 0.64 | 0.38 | 0.51 | 0.51 | 0.51 | 0.51 | 0.38 |      |
| 20 | EF1ACPU20 | 4 | 5    | 6    | 5    | 5    | 10   | 6    | 6    | 7    | 5    | 9    | 10   | 5    | 6    | 6    | 5    | 5    | 5    | 6    | -    | 1.14 | 0.64 | 0.64 | 0.89 | 0.64 | 0.76 | 0.76 | 0.76 | 0.76 | 0.64 |      |
| 21 | EF1ACPU21 | 5 | 6    | 7    | 6    | 6    | 11   | 7    | 7    | 8    | 6    | 6    | 11   | 6    | 7    | 7    | 6    | 6    | 6    | 7    | 9    | -    | 0.76 | 0.76 | 1.02 | 0.76 | 0.89 | 0.89 | 0.89 | 0.89 | 0.76 |      |
| 22 | EF1ACPU22 | 1 | 2    | 3    | 2    | 2    | 7    | 3    | 3    | 4    | 2    | 6    | 7    | 2    | 3    | 3    | 2    | 2    | 2    | 2    | 3    | 5    | 6    | -    | 0.25 | 0.51 | 0.25 | 0.38 | 0.38 | 0.38 | 0.38 | 0.25 |
| 23 | EF1ACPU23 | 1 | 2    | 3    | 2    | 2    | 7    | 3    | 3    | 4    | 2    | 6    | 7    | 2    | 3    | 3    | 2    | 2    | 2    | 2    | 3    | 5    | 6    | 2    | -    | 0.51 | 0.25 | 0.38 | 0.38 | 0.38 | 0.38 | 0.25 |
| 24 | EF1ACPU24 | 3 | 4    | 3    | 4    | 4    | 9    | 5    | 5    | 6    | 4    | 8    | 9    | 4    | 5    | 5    | 4    | 4    | 4    | 5    | 7    | 8    | 4    | 4    | -    | 0.51 | 0.64 | 0.64 | 0.64 | 0.64 | 0.51 |      |
| 25 | EF1ACPU25 | 1 | 2    | 3    | 2    | 2    | 7    | 3    | 3    | 4    | 2    | 6    | 7    | 2    | 3    | 3    | 2    | 2    | 2    | 2    | 3    | 5    | 6    | 2    | 2    | 4    | -    | 0.13 | 0.38 | 0.38 | 0.38 | 0.25 |
| 26 | EF1ACPU26 | 2 | 3    | 4    | 3    | 3    | 8    | 4    | 4    | 5    | 3    | 7    | 8    | 3    | 4    | 4    | 3    | 3    | 3    | 4    | 6    | 7    | 3    | 3    | 5    | 1    | -    | 0.51 | 0.51 | 0.51 | 0.38 |      |
| 27 | EF1ACPU27 | 2 | 3    | 4    | 3    | 3    | 8    | 4    | 4    | 5    | 3    | 7    | 8    | 3    | 4    | 4    | 3    | 3    | 3    | 4    | 6    | 7    | 3    | 3    | 5    | 3    | 4    | -    | 0.51 | 0.51 | 0.38 |      |
| 28 | EF1ACPU28 | 2 | 3    | 4    | 3    | 3    | 8    | 4    | 4    | 5    | 3    | 7    | 8    | 3    | 4    | 4    | 3    | 3    | 3    | 4    | 6    | 7    | 3    | 3    | 5    | 3    | 4    | 4    | -    | 0.51 | 0.38 |      |
| 29 | EF1ACPU29 | 2 | 3    | 4    | 3    | 3    | 8    | 4    | 4    | 5    | 3    | 7    | 8    | 3    | 4    | 4    | 3    | 3    | 3    | 4    | 6    | 7    | 3    | 3    | 5    | 3    | 4    | 4    | 4    | -    | 0.38 |      |
| 30 | EF1ACPU30 | 1 | 2    | 3    | 2    | 2    | 7    | 3    | 3    | 4    | 2    | 6    | 7    | 2    | 3    | 3    | 2    | 2    | 2    | 3    | 5    | 6    | 2    | 2    | 4    | 2    | 3    | 3    | 3    | 3    | -    |      |
| 31 | EF1ACPU31 | 2 | 3    | 4    | 3    | 3    | 8    | 4    | 4    | 5    | 3    | 7    | 8    | 3    | 4    | 4    | 3    | 3    | 3    | 4    | 6    | 7    | 3    | 3    | 5    | 3    | 4    | 4    | 4    | 4    | 1    |      |
| 32 | EF1ACPU32 | 1 | 2    | 3    | 2    | 2    | 7    | 3    | 3    | 4    | 2    | 6    | 7    | 2    | 3    | 3    | 2    | 2    | 2    | 2    | 3    | 5    | 6    | 2    | 2    | 4    | 2    | 3    | 3    | 3    | 2    |      |
| 33 | EF1ACPU33 | 3 | 4    | 5    | 4    | 4    | 9    | 5    | 5    | 6    | 4    | 8    | 9    | 4    | 5    | 5    | 4    | 4    | 4    | 5    | 7    | 8    | 4    | 4    | 6    | 4    | 5    | 5    | 5    | 5    | 4    |      |
| 34 | EF1ACPU34 | 2 | 3    | 4    | 3    | 3    | 8    | 4    | 4    | 5    | 3    | 5    | 8    | 3    | 4    | 4    | 3    | 3    | 3    | 4    | 6    | 5    | 3    | 3    | 5    | 3    | 4    | 4    | 4    | 4    | 3    |      |
| 35 | EF1ACPU35 | 3 | 4    | 5    | 4    | 4    | 9    | 5    | 5    | 6    | 4    | 8    | 9    | 4    | 5    | 5    | 4    | 4    | 4    | 5    | 6    | 8    | 4    | 4    | 6    | 4    | 5    | 5    | 5    | 5    | 4    |      |
| 36 | EF1ACPU36 | 5 | 6    | 7    | 6    | 6    | 11   | 7    | 7    | 8    | 6    | 10   | 11   | 6    | 7    | 7    | 6    | 6    | 6    | 7    | 9    | 10   | 6    | 6    | 8    | 6    | 7    | 7    | 7    | 7    | 6    |      |
| 37 | EF1ACPU37 | 1 | 2    | 3    | 2    | 2    | 7    | 3    | 3    | 4    | 2    | 6    | 7    | 2    | 3    | 3    | 2    | 2    | 2    | 2    | 3    | 5    | 6    | 2    | 2    | 4    | 2    | 3    | 3    | 3    | 2    |      |
| 38 | EF1ACPU38 | 2 | 3    | 4    | 3    | 3    | 8    | 4    | 4    | 5    | 3    | 7    | 8    | 3    | 4    | 4    | 3    | 3    | 3    | 4    | 6    | 7    | 3    | 3    | 5    | 3    | 4    | 4    | 4    | 4    | 3    |      |
| 39 | EF1ACPU39 | 6 | 7    | 8    | 7    | 7    | 10   | 8    | 8    | 9    | 7    | 9    | 10   | 7    | 6    | 6    | 7    | 7    | 7    | 6    | 10   | 11   | 7    | 7    | 9    | 7    | 8    | 8    | 8    | 8    | 7    |      |
| 40 | EF1ACPU40 | 7 | 8    | 9    | 8    | 8    | 11   | 9    | 9    | 10   | 8    | 10   | 11   | 8    | 7    | 7    | 8    | 8    | 8    | 7    | 11   | 12   | 8    | 8    | 10   | 8    | 9    | 9    | 9    | 9    | 8    |      |
| 41 | EF1ACPU41 | 6 | 7    | 8    | 7    | 7    | 10   | 8    | 8    | 9    | 7    | 9    | 10   | 7    | 6    | 6    | 7    | 7    | 7    | 6    | 10   | 11   | 7    | 7    | 9    | 7    | 8    | 8    | 8    | 8    | 7    |      |
| 42 | EF1ACPU42 | 3 | 4    | 5    | 4    | 4    | 9    | 5    | 5    | 6    | 4    | 8    | 9    | 4    | 5    | 5    | 4    | 4    | 4    | 5    | 7    | 8    | 4    | 4    | 6    | 4    | 5    | 5    | 5    | 5    | 4    |      |
| 43 | EF1ACPU43 | 2 | 3    | 4    | 3    | 3    | 6    | 4    | 4    | 5    | 3    | 5    | 6    | 3    | 2    | 2    | 3    | 3    | 3    | 2    | 6    | 7    | 3    | 3    | 5    | 3    | 4    | 4    | 4    | 4    | 3    |      |
| 44 | EF1ACPU44 | 5 | 6    | 7    | 6    | 6    | 9    | 7    | 7    | 8    | 6    | 8    | 9    | 6    | 5    | 5    | 6    | 6    | 6    | 5    | 9    | 10   | 6    | 6    | 8    | 6    | 7    | 7    | 7    | 7    | 6    |      |
| 45 | EF1ACPU45 | 4 | 5    | 6    | 5    | 5    | 7    | 6    | 6    | 7    | 5    | 7    | 8    | 5    | 4    | 4    | 5    | 5    | 5    | 4    | 8    | 9    | 5    | 5    | 7    | 5    | 6    | 6    | 6    | 6    | 5    |      |
| 46 | EF1ACPU46 | 3 | 4    | 5    | 4    | 4    | 7    | 5    | 5    | 6    | 4    | 6    | 7    | 4    | 3    | 3    | 4    | 4    | 4    | 3    | 7    | 8    | 4    | 4    | 6    | 4    | 5    | 5    | 5    | 5    | 4    |      |
| 47 | EF1ACPU47 | 4 | 5    | 6    | 5    | 5    | 6    | 6    | 6    | 7    | 5    | 1    | 8    | 5    | 4    | 4    | 5    | 5    | 5    | 4    | 8    | 5    | 5    | 5    | 7    | 5    | 6    | 6    | 6    | 6    | 5    |      |
| 48 | EF1ACPU48 | 4 | 5    | 6    | 5    | 5    | 10   | 6    | 6    | 7    | 3    | 9    | 6    | 5    | 6    | 5    | 5    | 5    | 5    | 6    | 8    | 9    | 5    | 5    | 7    | 5    | 6    | 6    | 6    | 6    | 5    |      |
| 49 | EF1ACPU49 | 2 | 3    | 4    | 3    | 3    | 6    | 4    | 4    | 5    | 3    | 5    | 4    | 3    | 2    | 2    | 3    | 3    | 3    | 2    | 6    | 7    | 3    | 3    | 5    | 3    | 4    | 4    | 4    | 4    | 3    |      |
| 50 | EF1ACPU50 | 2 | 3    | 4    | 3    | 3    | 8    | 4    | 4    | 5    | 1    | 7    | 6    | 3    | 4    | 4    | 3    | 3    | 3    | 4    | 6    | 7    | 3    | 3    | 5    | 3    | 4    | 4    | 4    | 4    | 3    |      |
| 51 | EF1ACPU51 | 4 | 5    | 6    | 5    | 5    | 8    | 6    | 6    | 7    | 5    | 7    | 4    | 5    | 4    | 4    | 5    | 5    | 5    | 4    | 8    | 9    | 5    | 5    | 7    | 5    | 6    | 6    | 6    | 6    | 5    |      |
| 52 | EF1ACPU52 | 3 | 4    | 5    | 4    | 4    | 7    | 5    | 5    | 6    | 4    | 6    | 3    | 4    | 3    | 3    | 4    | 4    | 4    | 3    | 7    | 8    | 4    | 4    | 6    | 4    | 5    | 5    | 5    | 5    | 4    |      |
| 53 | EF1ACPU53 | 3 | 4    | 5    | 4    | 4    | 9    | 5    | 5    | 6    | 2    | 8    | 7    | 4    | 5    | 5    | 4    | 4    | 4    | 5    | 7    | 8    | 4    | 4    | 6    | 4    | 5    | 5    | 5    | 5    | 4    |      |

|     |           |    |    |    |    |    |    |    |    |    |    |    |    |    |    |    |    |    |    |    |    |    |    |    |    |    |    |    |    |    |    |
|-----|-----------|----|----|----|----|----|----|----|----|----|----|----|----|----|----|----|----|----|----|----|----|----|----|----|----|----|----|----|----|----|----|
| 59  | EF1ACPI04 | 15 | 16 | 17 | 16 | 16 | 19 | 17 | 17 | 18 | 16 | 18 | 19 | 16 | 15 | 15 | 16 | 16 | 16 | 15 | 19 | 20 | 16 | 16 | 18 | 16 | 17 | 17 | 17 | 17 | 16 |
| 60  | EF1ACPI05 | 13 | 14 | 15 | 14 | 14 | 17 | 15 | 15 | 16 | 14 | 16 | 17 | 14 | 13 | 13 | 14 | 14 | 14 | 13 | 17 | 18 | 14 | 14 | 16 | 14 | 15 | 15 | 15 | 15 | 14 |
| 61  | EF1ACPI06 | 15 | 16 | 17 | 16 | 16 | 19 | 17 | 17 | 18 | 16 | 18 | 19 | 16 | 15 | 15 | 16 | 16 | 16 | 15 | 19 | 20 | 16 | 16 | 18 | 16 | 17 | 17 | 17 | 17 | 16 |
| 62  | EF1ACPI07 | 13 | 14 | 15 | 14 | 14 | 17 | 15 | 15 | 16 | 14 | 16 | 17 | 14 | 13 | 13 | 14 | 14 | 14 | 13 | 17 | 18 | 14 | 14 | 16 | 14 | 15 | 15 | 15 | 15 | 14 |
| 63  | EF1ACPI08 | 14 | 15 | 16 | 15 | 15 | 18 | 16 | 16 | 17 | 15 | 17 | 18 | 15 | 14 | 14 | 15 | 15 | 15 | 14 | 18 | 19 | 15 | 15 | 17 | 15 | 16 | 16 | 16 | 16 | 15 |
| 64  | EF1ACPI09 | 13 | 14 | 15 | 14 | 14 | 17 | 15 | 15 | 16 | 14 | 16 | 17 | 14 | 13 | 13 | 14 | 14 | 14 | 13 | 17 | 18 | 14 | 14 | 16 | 14 | 15 | 15 | 15 | 15 | 14 |
| 65  | EF1ACPI10 | 15 | 16 | 17 | 16 | 16 | 19 | 17 | 17 | 18 | 16 | 18 | 19 | 16 | 15 | 15 | 16 | 16 | 16 | 15 | 19 | 20 | 16 | 16 | 18 | 16 | 17 | 17 | 17 | 17 | 16 |
| 66  | EF1ACPI11 | 8  | 9  | 10 | 9  | 9  | 12 | 10 | 10 | 11 | 9  | 11 | 12 | 9  | 8  | 8  | 9  | 9  | 9  | 8  | 12 | 13 | 9  | 9  | 11 | 9  | 10 | 10 | 10 | 10 | 9  |
| 67  | EF1ACPI12 | 12 | 13 | 14 | 13 | 13 | 16 | 14 | 14 | 15 | 13 | 15 | 16 | 13 | 12 | 12 | 13 | 13 | 13 | 12 | 16 | 17 | 13 | 13 | 15 | 13 | 14 | 14 | 14 | 14 | 13 |
| 68  | EF1ACPI13 | 13 | 14 | 15 | 14 | 14 | 17 | 15 | 15 | 16 | 14 | 16 | 17 | 14 | 13 | 13 | 14 | 14 | 14 | 13 | 17 | 18 | 14 | 14 | 16 | 14 | 15 | 15 | 15 | 15 | 14 |
| 69  | EF1ACPI14 | 13 | 14 | 15 | 14 | 14 | 17 | 15 | 15 | 16 | 14 | 16 | 17 | 14 | 13 | 13 | 14 | 14 | 14 | 13 | 17 | 18 | 14 | 14 | 16 | 14 | 15 | 15 | 15 | 15 | 14 |
| 70  | EF1ACPI15 | 14 | 15 | 16 | 15 | 15 | 18 | 16 | 16 | 17 | 15 | 17 | 18 | 15 | 14 | 14 | 15 | 15 | 15 | 14 | 18 | 19 | 15 | 15 | 17 | 15 | 16 | 16 | 16 | 16 | 15 |
| 71  | EF1ACPI16 | 12 | 13 | 14 | 13 | 13 | 16 | 14 | 14 | 15 | 13 | 15 | 16 | 13 | 12 | 12 | 13 | 13 | 13 | 12 | 16 | 17 | 13 | 13 | 15 | 13 | 14 | 14 | 14 | 14 | 13 |
| 72  | EF1ACPI17 | 18 | 19 | 20 | 19 | 19 | 22 | 20 | 20 | 21 | 19 | 21 | 22 | 19 | 18 | 18 | 19 | 19 | 19 | 18 | 22 | 23 | 19 | 19 | 21 | 19 | 20 | 20 | 20 | 20 | 19 |
| 73  | EF1ACPI18 | 42 | 43 | 44 | 43 | 43 | 45 | 43 | 43 | 44 | 43 | 42 | 44 | 41 | 42 | 42 | 43 | 43 | 43 | 40 | 46 | 44 | 43 | 43 | 45 | 41 | 40 | 44 | 44 | 44 | 43 |
| 74  | EF1ACPI19 | 13 | 14 | 15 | 14 | 14 | 17 | 15 | 15 | 16 | 14 | 16 | 17 | 14 | 13 | 13 | 14 | 14 | 14 | 13 | 17 | 18 | 14 | 14 | 16 | 14 | 15 | 15 | 15 | 15 | 14 |
| 75  | EF1ACPI20 | 16 | 17 | 18 | 17 | 17 | 20 | 18 | 18 | 19 | 17 | 19 | 20 | 17 | 16 | 16 | 17 | 17 | 17 | 16 | 20 | 21 | 17 | 17 | 19 | 17 | 18 | 18 | 18 | 18 | 17 |
| 76  | EF1ACPI21 | 13 | 14 | 15 | 14 | 14 | 17 | 15 | 15 | 16 | 14 | 16 | 17 | 14 | 13 | 13 | 14 | 14 | 14 | 13 | 17 | 18 | 14 | 14 | 16 | 14 | 15 | 15 | 15 | 15 | 14 |
| 77  | EF1ACPI22 | 17 | 18 | 19 | 18 | 18 | 21 | 19 | 19 | 20 | 18 | 20 | 21 | 18 | 17 | 17 | 18 | 18 | 18 | 17 | 21 | 22 | 18 | 18 | 20 | 18 | 19 | 19 | 19 | 19 | 18 |
| 78  | EF1ACPI23 | 15 | 16 | 17 | 16 | 16 | 19 | 17 | 17 | 18 | 16 | 18 | 19 | 16 | 15 | 15 | 16 | 16 | 16 | 15 | 19 | 20 | 16 | 16 | 18 | 16 | 17 | 17 | 17 | 17 | 16 |
| 79  | EF1ACPI24 | 13 | 14 | 15 | 14 | 14 | 17 | 15 | 15 | 16 | 14 | 16 | 17 | 14 | 13 | 13 | 14 | 14 | 14 | 13 | 17 | 18 | 14 | 14 | 16 | 14 | 15 | 15 | 15 | 15 | 14 |
| 80  | EF1ACPI25 | 13 | 14 | 15 | 14 | 14 | 17 | 15 | 15 | 16 | 14 | 16 | 17 | 14 | 13 | 13 | 14 | 14 | 14 | 13 | 17 | 18 | 14 | 14 | 16 | 14 | 15 | 15 | 15 | 15 | 14 |
| 81  | EF1ACPI26 | 18 | 19 | 20 | 19 | 19 | 22 | 20 | 20 | 21 | 19 | 21 | 22 | 19 | 18 | 18 | 19 | 19 | 19 | 18 | 22 | 23 | 19 | 19 | 20 | 19 | 20 | 20 | 20 | 20 | 19 |
| 82  | EF1ACPI27 | 16 | 17 | 18 | 17 | 17 | 20 | 18 | 18 | 19 | 17 | 19 | 20 | 17 | 16 | 16 | 17 | 17 | 17 | 16 | 20 | 21 | 17 | 17 | 19 | 17 | 18 | 18 | 18 | 18 | 17 |
| 83  | EF1ACPI28 | 13 | 14 | 15 | 14 | 14 | 17 | 15 | 15 | 16 | 14 | 16 | 17 | 14 | 13 | 13 | 14 | 14 | 14 | 13 | 17 | 18 | 14 | 14 | 16 | 14 | 15 | 15 | 15 | 15 | 14 |
| 84  | EF1ACPI29 | 13 | 14 | 15 | 14 | 14 | 17 | 15 | 15 | 16 | 14 | 16 | 17 | 14 | 13 | 13 | 14 | 14 | 14 | 13 | 17 | 18 | 14 | 14 | 16 | 14 | 15 | 15 | 15 | 15 | 14 |
| 85  | EF1ACPI30 | 15 | 16 | 17 | 16 | 16 | 19 | 17 | 17 | 18 | 16 | 18 | 19 | 16 | 15 | 15 | 16 | 16 | 16 | 15 | 19 | 20 | 16 | 16 | 18 | 16 | 17 | 17 | 17 | 17 | 16 |
| 86  | EF1ACPI31 | 13 | 14 | 15 | 14 | 14 | 17 | 15 | 15 | 16 | 14 | 16 | 17 | 14 | 13 | 13 | 14 | 14 | 14 | 13 | 17 | 18 | 14 | 14 | 16 | 14 | 15 | 15 | 15 | 15 | 14 |
| 87  | EF1ACPI32 | 14 | 15 | 16 | 15 | 15 | 18 | 16 | 16 | 17 | 15 | 17 | 18 | 15 | 14 | 14 | 15 | 15 | 15 | 14 | 18 | 19 | 15 | 15 | 17 | 15 | 16 | 14 | 16 | 16 | 15 |
| 88  | EF1ACPI33 | 13 | 14 | 15 | 14 | 14 | 17 | 15 | 15 | 16 | 14 | 16 | 17 | 14 | 13 | 13 | 14 | 14 | 14 | 13 | 17 | 18 | 14 | 14 | 16 | 14 | 15 | 15 | 15 | 15 | 14 |
| 89  | EF1ACPI34 | 14 | 15 | 16 | 15 | 15 | 18 | 16 | 16 | 17 | 15 | 17 | 18 | 15 | 14 | 14 | 15 | 15 | 15 | 14 | 18 | 19 | 15 | 15 | 17 | 15 | 16 | 16 | 16 | 16 | 15 |
| 90  | EF1ACPI35 | 14 | 15 | 16 | 15 | 15 | 18 | 16 | 16 | 17 | 15 | 17 | 18 | 15 | 14 | 14 | 15 | 15 | 15 | 14 | 18 | 19 | 15 | 15 | 17 | 15 | 16 | 16 | 16 | 16 | 15 |
| 91  | EF1ACPI36 | 13 | 14 | 15 | 14 | 14 | 17 | 15 | 15 | 16 | 14 | 16 | 17 | 14 | 13 | 13 | 14 | 14 | 14 | 13 | 17 | 18 | 14 | 14 | 16 | 14 | 15 | 15 | 15 | 15 | 14 |
| 92  | EF1ACPI37 | 15 | 16 | 17 | 16 | 16 | 19 | 17 | 17 | 18 | 16 | 18 | 19 | 16 | 15 | 15 | 16 | 16 | 16 | 15 | 19 | 20 | 16 | 16 | 18 | 16 | 17 | 17 | 17 | 17 | 16 |
| 93  | EF1ACPI38 | 15 | 16 | 17 | 16 | 16 | 19 | 17 | 17 | 18 | 16 | 18 | 19 | 16 | 14 | 15 | 16 | 16 | 16 | 15 | 19 | 20 | 16 | 16 | 18 | 16 | 17 | 17 | 17 | 17 | 16 |
| 94  | EF1ACPI39 | 14 | 15 | 16 | 15 | 15 | 18 | 16 | 16 | 17 | 15 | 17 | 16 | 15 | 14 | 14 | 15 | 15 | 15 | 14 | 18 | 19 | 15 | 15 | 17 | 15 | 16 | 16 | 16 | 16 | 15 |
| 95  | EF1ACPI40 | 18 | 19 | 20 | 19 | 19 | 21 | 20 | 20 | 21 | 19 | 21 | 22 | 19 | 17 | 18 | 19 | 19 | 19 | 18 | 22 | 23 | 19 | 19 | 21 | 19 | 20 | 20 | 20 | 20 | 19 |
| 96  | EF1ACPI41 | 14 | 15 | 16 | 15 | 15 | 18 | 16 | 16 | 17 | 15 | 17 | 18 | 15 | 13 | 14 | 15 | 15 | 15 | 14 | 18 | 19 | 15 | 15 | 17 | 15 | 16 | 16 | 16 | 16 | 15 |
| 97  | EF1ACPI42 | 17 | 18 | 19 | 18 | 18 | 21 | 19 | 19 | 20 | 18 | 20 | 21 | 18 | 16 | 17 | 18 | 18 | 18 | 17 | 21 | 20 | 18 | 18 | 20 | 18 | 19 | 19 | 19 | 19 | 18 |
| 98  | PI1       | 15 | 16 | 17 | 16 | 16 | 19 | 17 | 17 | 18 | 16 | 18 | 19 | 16 | 15 | 14 | 16 | 16 | 16 | 15 | 19 | 20 | 16 | 16 | 18 | 16 | 17 | 17 | 17 | 17 | 16 |
| 99  | PI2       | 17 | 18 | 19 | 18 | 18 | 21 | 19 | 19 | 20 | 18 | 20 | 21 | 18 | 17 | 17 | 18 | 18 | 18 | 17 | 21 | 22 | 18 | 18 | 20 | 18 | 19 | 19 | 19 | 19 | 18 |
| 100 | PI3       | 14 | 15 | 16 | 15 | 15 | 18 | 16 | 16 | 17 | 15 | 17 | 18 | 15 | 14 | 14 | 15 | 15 | 15 | 14 | 18 | 19 | 15 | 15 | 17 | 15 | 16 | 16 | 16 | 16 | 15 |
| 101 | PI4       | 16 | 17 | 18 | 17 | 17 | 20 | 18 | 18 | 19 | 17 | 19 | 20 | 17 | 16 | 16 | 17 | 17 | 17 | 16 | 20 | 21 | 17 | 17 | 19 | 17 | 18 | 18 | 18 | 18 | 17 |
| 102 | PI5       | 13 | 14 | 15 | 14 | 14 | 17 | 15 | 15 | 16 | 14 | 16 | 17 | 14 | 13 | 13 | 14 | 14 | 14 | 13 | 17 | 18 | 14 | 14 | 16 | 14 | 15 | 15 | 15 | 15 | 14 |
| 103 | PI6       | 16 | 17 | 18 | 17 | 17 | 20 | 18 | 18 | 19 | 17 | 19 | 20 | 17 | 16 | 16 | 17 | 17 | 17 | 16 | 20 | 21 | 17 | 17 | 19 | 17 | 18 | 18 | 18 | 18 | 17 |
| 104 | PU1       | 5  | 6  | 7  | 6  | 6  | 5  | 5  | 5  | 6  | 6  | 6  | 9  | 6  | 5  | 5  | 6  | 6  | 6  | 5  | 9  | 10 | 6  | 6  | 8  | 6  | 7  | 7  | 7  | 7  | 6  |
| 105 | PU2       | 4  | 5  | 6  | 5  | 5  | 10 | 6  | 6  | 7  | 5  | 9  | 10 | 5  | 6  | 6  | 5  | 5  | 5  | 6  | 8  | 9  | 5  | 5  | 7  | 5  | 6  | 6  | 6  | 6  | 5  |
| 106 | PU3       | 2  | 3  | 4  | 3  | 3  | 8  | 4  | 4  | 5  | 3  | 7  | 8  | 3  | 4  | 4  | 3  | 3  | 3  | 4  | 6  | 7  | 3  | 3  | 5  | 3  | 4  | 4  | 4  | 4  | 3  |
| 107 | PU4       | 4  | 5  | 6  | 5  | 5  | 10 | 6  | 6  | 7  | 5  | 9  | 10 | 5  | 6  | 6  | 5  | 5  | 5  | 6  | 8  | 9  | 5  | 5  | 7  | 5  | 6  | 6  | 6  | 6  | 5  |
| 108 | PU5       | 2  | 3  | 4  | 3  | 3  | 8  | 4  | 4  | 5  | 3  | 7  | 8  | 3  | 4  | 4  | 3  | 3  | 3  | 4  | 6  | 7  | 3  | 3  | 5  | 3  | 4  | 4  | 4  | 4  | 3  |
| 109 | PU6       | 4  | 5  | 6  | 5  | 5  | 8  | 6  | 6  | 7  | 5  | 7  | 8  | 5  | 4  | 4  | 5  | 5  | 5  | 4  | 8  | 9  | 5  | 5  | 7  | 5  | 6  | 6  | 6  | 6  | 5  |
| 110 | PU7       | 5  | 6  | 7  | 6  | 6  | 9  | 7  | 7  | 8  | 6  | 8  | 9  | 6  | 5  | 4  | 6  | 6  | 6  | 5  | 9  | 10 | 6  | 6  | 8  | 6  | 7  | 7  | 7  | 7  | 6  |

|    |           | 31   | 32   | 33   | 34   | 35   | 36   | 37   | 38   | 39   | 40   | 41   | 42   | 43   | 44   | 45   | 46   | 47   | 48   | 49   | 50   | 51   | 52   | 53   | 54   | 55   | 56   | 57   | 58   | 59   | 60   |
|----|-----------|------|------|------|------|------|------|------|------|------|------|------|------|------|------|------|------|------|------|------|------|------|------|------|------|------|------|------|------|------|------|
| 1  | EF1ACPU01 | 0.25 | 0.13 | 0.38 | 0.25 | 0.38 | 0.64 | 0.13 | 0.25 | 0.76 | 0.89 | 0.76 | 0.38 | 0.25 | 0.64 | 0.51 | 0.38 | 0.51 | 0.51 | 0.25 | 0.25 | 0.51 | 0.38 | 0.38 | 0.25 | 0.13 | 1.40 | 1.52 | 1.52 | 1.90 | 1.65 |
| 2  | EF1ACPU02 | 0.38 | 0.25 | 0.51 | 0.38 | 0.51 | 0.76 | 0.25 | 0.38 | 0.89 | 1.02 | 0.89 | 0.51 | 0.38 | 0.76 | 0.64 | 0.51 | 0.64 | 0.64 | 0.38 | 0.38 | 0.64 | 0.51 | 0.38 | 0.25 | 1.52 | 1.65 | 1.65 | 2.03 | 1.78 |      |
| 3  | EF1ACPU03 | 0.51 | 0.38 | 0.64 | 0.51 | 0.64 | 0.89 | 0.38 | 0.51 | 1.02 | 1.14 | 1.02 | 0.64 | 0.51 | 0.89 | 0.76 | 0.64 | 0.76 | 0.76 | 0.51 | 0.51 | 0.76 | 0.64 | 0.64 | 0.51 | 0.38 | 1.65 | 1.78 | 1.78 | 2.16 | 1.90 |
| 4  | EF1ACPU04 | 0.38 | 0.25 | 0.51 | 0.38 | 0.51 | 0.76 | 0.25 | 0.38 | 0.89 | 1.02 | 0.89 | 0.51 | 0.38 | 0.76 | 0.64 | 0.51 | 0.64 | 0.64 | 0.38 | 0.38 | 0.64 | 0.51 | 0.51 | 0.38 | 0.25 | 1.52 | 1.65 | 1.65 | 2.03 | 1.78 |
| 5  | EF1ACPU05 | 0.38 | 0.25 | 0.51 | 0.38 | 0.51 | 0.76 | 0.25 | 0.38 | 0.89 | 1.02 | 0.89 | 0.51 | 0.38 | 0.76 | 0.64 | 0.51 | 0.64 | 0.64 | 0.38 | 0.38 | 0.64 | 0.51 | 0.51 | 0.38 | 0.25 | 1.52 | 1.65 | 1.65 | 2.03 | 1.78 |
| 6  | EF1ACPU06 | 1.02 | 0.89 | 1.14 | 1.02 | 1.14 | 1.40 | 0.89 | 1.02 | 1.27 | 1.40 | 1.27 | 1.14 | 0.76 | 1.14 | 0.89 | 0.89 | 0.76 | 1.27 | 0.76 | 1.02 | 1.02 | 0.89 | 1.14 | 1.02 | 0.89 | 1.90 | 2.03 | 2.03 | 2.41 | 2.16 |
| 7  | EF1ACPU07 | 0.51 | 0.38 | 0.64 | 0.51 | 0.64 | 0.89 | 0.38 | 0.51 | 1.02 | 1.14 | 1.02 | 0.64 | 0.51 | 0.89 | 0.76 | 0.64 | 0.76 | 0.76 | 0.51 | 0.51 | 0.76 | 0.64 | 0.64 | 0.51 | 0.38 | 1.65 | 1.78 | 1.78 | 2.16 | 1.90 |
| 8  | EF1ACPU08 | 0.51 | 0.38 | 0.64 | 0.51 | 0.64 | 0.89 | 0.38 | 0.51 | 1.02 | 1.14 | 1.02 | 0.64 | 0.51 | 0.89 | 0.76 | 0.64 | 0.76 | 0.76 | 0.51 | 0.51 | 0.76 | 0.64 | 0.64 | 0.51 | 0.38 | 1.65 | 1.78 | 1.78 | 2.16 | 1.90 |
| 9  | EF1ACPU09 | 0.64 | 0.51 | 0.76 | 0.64 | 0.76 | 1.02 | 0.51 | 0.64 | 1.14 | 1.27 | 1.14 | 0.76 | 0.64 | 1.02 | 0.89 | 0.76 | 0.89 | 0.89 | 0.64 | 0.64 | 0.89 | 0.76 | 0.76 | 0.64 | 0.51 | 1.78 | 1.90 | 1.90 | 2.28 | 2.03 |
| 10 | EF1ACPU10 | 0.38 | 0.25 | 0.51 | 0.38 | 0.51 | 0.76 | 0.25 | 0.38 | 0.89 | 1.02 | 0.89 | 0.51 | 0.38 | 0.76 | 0.64 | 0.51 | 0.64 | 0.38 | 0.38 | 0.13 | 0.64 | 0.51 | 0.25 | 0.38 | 0.25 | 1.52 | 1.65 | 1.65 | 2.03 | 1.78 |
| 11 | EF1ACPU11 | 0.89 | 0.76 | 1.02 | 0.64 | 1.02 | 1.27 | 0.76 | 0.89 | 1.14 | 1.27 | 1.14 | 1.02 | 0.64 | 1.02 | 0.89 | 0.76 | 0.13 | 1.14 | 0.64 | 0.89 | 0.89 | 0.76 | 1.02 | 0.89 | 0.76 | 1.78 | 1.90 | 1.90 | 2.28 | 2.03 |
| 12 | EF1ACPU12 | 1.02 | 0.89 | 1.14 | 1.02 | 1.14 | 1.40 | 0.89 | 1.02 | 1.27 | 1.40 | 1.27 | 1.14 | 0.76 | 1.14 | 1.02 | 0.89 | 1.02 | 0.76 | 0.51 | 0.76 | 0.51 | 0.38 | 0.89 | 1.02 | 0.89 | 1.90 | 2.03 | 2.03 | 2.41 | 2.16 |
| 13 | EF1ACPU13 | 0.38 | 0.25 | 0.51 | 0.38 | 0.51 | 0.76 | 0.25 | 0.38 | 0.89 | 1.02 | 0.89 | 0.51 | 0.38 | 0.76 | 0.64 | 0.51 | 0.64 | 0.64 | 0.38 | 0.38 | 0.64 | 0.51 | 0.51 | 0.38 | 0.25 | 1.52 | 1.65 | 1.65 | 2.03 | 1.78 |
| 14 | EF1ACPU14 | 0.51 | 0.38 | 0.64 | 0.51 | 0.64 | 0.89 | 0.38 | 0.51 | 0.76 | 0.89 | 0.76 | 0.64 | 0.25 | 0.64 | 0.51 | 0.38 | 0.51 | 0.76 | 0.25 | 0.51 | 0.51 | 0.38 | 0.64 | 0.51 | 0.38 | 1.40 | 1.52 | 1.52 | 1.90 | 1.65 |
| 15 | EF1ACPU15 | 0.51 | 0.38 | 0.64 | 0.51 | 0.64 | 0.89 | 0.38 | 0.51 | 0.76 | 0.89 | 0.76 | 0.64 | 0.25 | 0.64 | 0.51 | 0.38 | 0.51 | 0.76 | 0.25 | 0.51 | 0.51 | 0.38 | 0.64 | 0.51 | 0.38 | 1.40 | 1.52 | 1.52 | 1.90 | 1.65 |
| 16 | EF1ACPU16 | 0.38 | 0.25 | 0.51 | 0.38 | 0.51 | 0.76 | 0.25 | 0.38 | 0.89 | 1.02 | 0.89 | 0.51 | 0.38 | 0.76 | 0.64 | 0.51 | 0.64 | 0.64 | 0.38 | 0.38 | 0.64 | 0.51 | 0.51 | 0.38 | 0.25 | 1.52 | 1.65 | 1.65 | 2.03 | 1.78 |
| 17 | EF1ACPU17 | 0.38 | 0.25 | 0.51 | 0.38 | 0.51 | 0.76 | 0.25 | 0.38 | 0.89 | 1.02 | 0.89 | 0.51 | 0.38 | 0.76 | 0.64 | 0.51 | 0.64 | 0.64 | 0.38 | 0.38 | 0.64 | 0.51 | 0.51 | 0.38 | 0.25 | 1.52 | 1.65 | 1.65 | 2.03 | 1.78 |
| 18 | EF1ACPU18 | 0.38 | 0.25 | 0.51 | 0.38 | 0.51 | 0.76 | 0.25 | 0.38 | 0.89 | 1.02 | 0.89 | 0.51 | 0.38 | 0.76 | 0.64 | 0.51 | 0.64 | 0.64 | 0.38 | 0.38 | 0.64 | 0.51 | 0.51 | 0.38 | 0.25 | 1.52 | 1.65 | 1.65 | 2.03 | 1.78 |
| 19 | EF1ACPU19 | 0.51 | 0.38 | 0.64 | 0.51 | 0.64 | 0.89 | 0.38 | 0.51 | 0.76 | 0.89 | 0.76 | 0.64 | 0.25 | 0.64 | 0.51 | 0.38 | 0.51 | 0.76 | 0.25 | 0.51 | 0.51 | 0.38 | 0.64 | 0.51 | 0.38 | 1.40 | 1.52 | 1.52 | 1.90 | 1.65 |
| 20 | EF1ACPU20 | 0.76 | 0.64 | 0.89 | 0.76 | 0.76 | 1.14 | 0.64 | 0.76 | 1.27 | 1.40 | 1.27 | 0.89 | 0.76 | 1.14 | 1.02 | 0.89 | 1.02 | 1.02 | 0.76 | 0.76 | 1.02 | 0.89 | 0.89 | 0.76 | 0.64 | 1.90 | 2.03 | 2.03 | 2.41 | 2.16 |
| 21 | EF1ACPU21 | 0.89 | 0.76 | 1.02 | 0.64 | 1.02 | 1.27 | 0.76 | 0.89 | 1.40 | 1.52 | 1.40 | 1.02 | 0.89 | 1.27 | 1.14 | 1.02 | 0.64 | 1.14 | 0.89 | 0.89 | 1.14 | 1.02 | 1.02 | 0.89 | 0.76 | 2.03 | 2.16 | 2.16 | 2.54 | 2.28 |
| 22 | EF1ACPU22 | 0.38 | 0.25 | 0.51 | 0.38 | 0.51 | 0.76 | 0.25 | 0.38 | 0.89 | 1.02 | 0.89 | 0.51 | 0.38 | 0.76 | 0.64 | 0.51 | 0.64 | 0.64 | 0.38 | 0.38 | 0.64 | 0.51 | 0.51 | 0.38 | 0.25 | 1.52 | 1.65 | 1.65 | 2.03 | 1.78 |
| 23 | EF1ACPU23 | 0.38 | 0.25 | 0.51 | 0.38 | 0.51 | 0.76 | 0.25 | 0.38 | 0.89 | 1.02 | 0.89 | 0.51 | 0.38 | 0.76 | 0.64 | 0.51 | 0.64 | 0.64 | 0.38 | 0.38 | 0.64 | 0.51 | 0.51 | 0.38 | 0.25 | 1.52 | 1.65 | 1.65 | 2.03 | 1.78 |
| 24 | EF1ACPU24 | 0.64 | 0.51 | 0.76 | 0.64 | 0.76 | 1.02 | 0.51 | 0.64 | 1.14 | 1.27 | 1.14 | 0.76 | 0.64 | 1.02 | 0.89 | 0.76 | 0.89 | 0.89 | 0.64 | 0.64 | 0.89 | 0.76 | 0.76 | 0.64 | 0.51 | 1.78 | 1.90 | 1.90 | 2.28 | 2.03 |
| 25 | EF1ACPU25 | 0.38 | 0.25 | 0.51 | 0.38 | 0.51 | 0.76 | 0.25 | 0.38 | 0.89 | 1.02 | 0.89 | 0.51 | 0.38 | 0.76 | 0.64 | 0.51 | 0.64 | 0.64 | 0.38 | 0.38 | 0.64 | 0.51 | 0.51 | 0.38 | 0.25 | 1.52 | 1.65 | 1.65 | 2.03 | 1.78 |
| 26 | EF1ACPU26 | 0.51 | 0.38 | 0.64 | 0.51 | 0.64 | 0.89 | 0.38 | 0.51 | 1.02 | 1.14 | 1.02 | 0.64 | 0.51 | 0.89 | 0.76 | 0.64 | 0.76 | 0.76 | 0.51 | 0.51 | 0.76 | 0.64 | 0.64 | 0.51 | 0.38 | 1.65 | 1.78 | 1.78 | 2.16 | 1.90 |
| 27 | EF1ACPU27 | 0.51 | 0.38 | 0.64 | 0.51 | 0.64 | 0.89 | 0.38 | 0.51 | 1.02 | 1.14 | 1.02 | 0.64 | 0.51 | 0.89 | 0.76 | 0.64 | 0.76 | 0.76 | 0.51 | 0.51 | 0.76 | 0.64 | 0.64 | 0.51 | 0.38 | 1.65 | 1.78 | 1.78 | 2.16 | 1.90 |
| 28 | EF1ACPU28 | 0.51 | 0.38 | 0.64 | 0.51 | 0.64 | 0.89 | 0.38 | 0.51 | 1.02 | 1.14 | 1.02 | 0.64 | 0.51 | 0.89 | 0.76 | 0.64 | 0.76 | 0.76 | 0.51 | 0.51 | 0.76 | 0.64 | 0.64 | 0.51 | 0.38 | 1.65 | 1.78 | 1.78 | 2.16 | 1.90 |
| 29 | EF1ACPU29 | 0.51 | 0.38 | 0.64 | 0.51 | 0.64 | 0.89 | 0.38 | 0.51 | 1.02 | 1.14 | 1.02 | 0.64 | 0.51 | 0.89 | 0.76 | 0.64 | 0.76 | 0.76 | 0.51 | 0.51 | 0.76 | 0.64 | 0.64 | 0.51 | 0.38 | 1.65 | 1.78 | 1.78 | 2.16 | 1.90 |
| 30 | EF1ACPU30 | 0.13 | 0.25 | 0.51 | 0.38 | 0.51 | 0.76 | 0.25 | 0.38 | 0.89 | 1.02 | 0.89 | 0.51 | 0.38 | 0.76 | 0.64 | 0.51 | 0.64 | 0.64 | 0.38 | 0.38 | 0.64 | 0.51 | 0.51 | 0.38 | 0.25 | 1.52 | 1.65 | 1.65 | 2.03 | 1.78 |
| 31 | EF1ACPU31 | -    | 0.38 | 0.64 | 0.51 | 0.64 | 0.89 | 0.38 | 0.51 | 1.02 | 1.14 | 1.02 | 0.64 | 0.51 | 0.89 | 0.76 | 0.64 | 0.76 | 0.76 | 0.51 | 0.51 | 0.76 | 0.64 | 0.64 | 0.51 | 0.38 | 1.65 | 1.78 | 1.78 | 2.16 | 1.90 |
| 32 | EF1ACPU32 | 3    | -    | 0.51 | 0.38 | 0.51 | 0.76 | 0.25 | 0.38 | 0.89 | 1.02 | 0.89 | 0.51 | 0.38 | 0.76 | 0.64 | 0.51 | 0.64 | 0.64 | 0.38 | 0.38 | 0.64 | 0.51 | 0.51 | 0.38 | 0.25 | 1.52 | 1.65 | 1.65 | 2.03 | 1.78 |
| 33 | EF1ACPU33 | 5    | 4    | -    | 0.64 | 0.76 | 1.02 | 0.51 | 0.64 | 1.14 | 1.27 | 1.14 | 0.76 | 0.64 | 1.02 | 0.89 | 0.76 | 0.89 | 0.89 | 0.64 | 0.38 | 0.89 | 0.76 | 0.76 | 0.64 | 0.51 | 1.52 | 1.65 | 1.65 | 2.03 | 1.78 |
| 34 | EF1ACPU34 | 4    | 3    | 5    | -    | 0.64 | 0.89 | 0.38 | 0.51 | 1.02 | 1.14 | 1.02 | 0.64 | 0.51 | 0.89 | 0.76 | 0.64 | 0.51 | 0.76 | 0.51 | 0.51 | 0.76 | 0.64 | 0.64 | 0.51 | 0.38 | 1.65 | 1.78 | 1.78 | 2.16 | 1.90 |
| 35 | EF1ACPU35 | 5    | 4    | 6    | 5    | -    | 1.02 | 0.51 | 0.64 | 1.14 | 1.27 | 1.14 | 0.76 | 0.64 | 1.02 | 0.89 | 0.76 | 0.89 | 0.89 | 0.64 | 0.64 | 0.89 | 0.76 | 0.76 | 0.64 | 0.51 | 1.78 | 1.90 | 1.90 | 2.28 | 2.03 |
| 36 | EF1ACPU36 | 7    | 6    | 8    | 7    | 8    | -    | 0.76 | 0.89 | 1.40 | 1.52 | 1.40 | 1.02 | 0.89 | 1.27 | 1.14 | 1.02 | 1.14 | 1.14 | 0.89 | 0.89 | 1.14 | 1.02 | 1.02 | 0.89 | 0.76 | 2.03 | 2.16 | 2.16 | 2.54 | 2.28 |
| 37 | EF1ACPU37 | 3    | 2    | 4    | 3    | 4    | 6    | -    | 0.38 | 0.89 | 1.02 | 0.89 | 0.51 | 0.38 | 0.76 | 0.64 | 0.51 | 0.64 | 0.64 | 0.38 | 0.38 | 0.64 | 0.51 | 0.51 | 0.38 | 0.25 | 1.52 | 1.65 | 1.65 | 2.03 | 1.78 |
| 38 | EF1ACPU38 | 4    | 3    | 5    | 4    | 5    | 7    | 3    | -    | 1.02 | 1.14 | 1.02 | 0.64 | 0.51 | 0.89 | 0.76 | 0.64 | 0.76 | 0.76 | 0.51 | 0.51 | 0.76 | 0.64 | 0.64 | 0.51 | 0.38 | 1.52 | 1.65 | 1.65 | 2.03 | 1.78 |
| 39 | EF1ACPU39 | 8    | 7    | 9    | 8    | 9    | 11   | 7    | 8    | -    | 0.38 | 0.25 | 1.14 | 0.76 | 0.89 | 1.02 | 0.89 | 1.02 | 1.27 | 0.76 | 1.02 | 1.02 | 0.89 | 1.14 | 1.02 | 0.89 | 1.90 | 2.03 | 2.03 | 2.41 | 2.16 |
| 40 | EF1ACPU40 | 9    | 8    | 10   | 9    | 10   | 12   | 8    | 9    | 3    | -    | 0.38 | 1.27 | 0.89 | 1.02 | 1.14 | 1.02 | 1.14 | 1.40 | 0.89 | 1.14 | 1.14 | 1.02 | 1.27 | 1.14 | 1.02 | 2.03 | 2.16 | 2.16 | 2.54 | 2.28 |
| 41 | EF1ACPU41 | 8    | 7    | 9    | 8    | 9    | 11   | 7    | 8    | 2    | 3    | -    | 1.14 | 0.76 | 0.89 | 1.02 | 0.89 | 1.02 | 1.27 | 0.76 | 1.02 | 1.02 | 0.89 | 1.14 | 1.02 | 0.89 | 1.90 | 2.03 | 2.03 | 2.41 | 2.16 |
| 42 | EF1ACPU42 | 5    | 4    | 6    | 5    | 6    | 8    | 4    | 5    | 9    | 10   | 9    | -    | 0.64 | 1.02 | 0.89 | 0.76 | 0.89 | 0.89 | 0.64 | 0.64 | 0.89 | 0.76 | 0.76 | 0.64 | 0.51 | 1.78 | 1.90 | 1.90 | 2.28 | 2.03 |
| 43 | EF1ACPU43 | 4    | 3    | 5    | 4    | 5    | 7    | 3    | 4    | 6    | 7    | 6</  |      |      |      |      |      |      |      |      |      |      |      |      |      |      |      |      |      |      |      |



|     |           |    |    |    |    |    |    |    |    |    |    |    |    |    |    |    |    |    |    |    |    |    |    |    |    |    |    |    |    |    |    |
|-----|-----------|----|----|----|----|----|----|----|----|----|----|----|----|----|----|----|----|----|----|----|----|----|----|----|----|----|----|----|----|----|----|
| 60  | EF1ACPI05 | 15 | 14 | 14 | 15 | 16 | 18 | 14 | 14 | 17 | 18 | 17 | 16 | 13 | 16 | 15 | 14 | 15 | 17 | 13 | 15 | 15 | 14 | 16 | 15 | 14 | 2  | 3  | 3  | 4  | -  |
| 61  | EF1ACPI06 | 17 | 16 | 16 | 17 | 18 | 20 | 16 | 16 | 19 | 20 | 19 | 18 | 15 | 18 | 17 | 16 | 17 | 19 | 15 | 17 | 17 | 16 | 18 | 17 | 16 | 4  | 5  | 5  | 6  | 4  |
| 62  | EF1ACPI07 | 15 | 14 | 14 | 15 | 16 | 18 | 14 | 14 | 17 | 18 | 17 | 16 | 13 | 16 | 15 | 14 | 15 | 17 | 13 | 15 | 15 | 14 | 16 | 15 | 14 | 2  | 3  | 3  | 4  | 2  |
| 63  | EF1ACPI08 | 16 | 15 | 15 | 16 | 17 | 19 | 15 | 15 | 18 | 19 | 18 | 17 | 14 | 17 | 16 | 15 | 16 | 18 | 14 | 16 | 16 | 15 | 17 | 16 | 15 | 3  | 4  | 4  | 5  | 3  |
| 64  | EF1ACPI09 | 15 | 14 | 14 | 15 | 16 | 18 | 14 | 14 | 17 | 18 | 17 | 16 | 13 | 16 | 15 | 14 | 15 | 17 | 13 | 15 | 15 | 14 | 16 | 15 | 14 | 2  | 3  | 3  | 4  | 2  |
| 65  | EF1ACPI10 | 17 | 16 | 16 | 17 | 18 | 20 | 16 | 16 | 19 | 20 | 19 | 18 | 15 | 18 | 17 | 16 | 17 | 19 | 15 | 17 | 17 | 16 | 18 | 17 | 16 | 4  | 5  | 5  | 6  | 4  |
| 66  | EF1ACPI11 | 10 | 9  | 11 | 10 | 11 | 13 | 9  | 10 | 12 | 13 | 12 | 11 | 8  | 11 | 10 | 9  | 10 | 12 | 8  | 10 | 10 | 9  | 11 | 10 | 9  | 9  | 10 | 10 | 13 | 11 |
| 67  | EF1ACPI12 | 14 | 13 | 13 | 14 | 15 | 17 | 13 | 13 | 16 | 17 | 16 | 15 | 12 | 15 | 14 | 13 | 14 | 16 | 12 | 14 | 14 | 13 | 15 | 14 | 13 | 1  | 2  | 2  | 3  | 1  |
| 68  | EF1ACPI13 | 15 | 14 | 14 | 15 | 16 | 18 | 14 | 14 | 17 | 18 | 17 | 16 | 13 | 16 | 15 | 14 | 15 | 17 | 13 | 15 | 15 | 14 | 16 | 15 | 14 | 2  | 3  | 3  | 4  | 2  |
| 69  | EF1ACPI14 | 15 | 14 | 14 | 15 | 16 | 18 | 14 | 14 | 17 | 18 | 17 | 16 | 13 | 16 | 15 | 14 | 15 | 17 | 13 | 15 | 15 | 14 | 16 | 15 | 14 | 2  | 3  | 3  | 4  | 2  |
| 70  | EF1ACPI15 | 16 | 15 | 15 | 16 | 17 | 19 | 15 | 15 | 18 | 19 | 18 | 17 | 14 | 17 | 16 | 15 | 16 | 18 | 14 | 16 | 16 | 15 | 17 | 16 | 15 | 3  | 4  | 4  | 5  | 3  |
| 71  | EF1ACPI16 | 14 | 13 | 13 | 14 | 15 | 17 | 13 | 13 | 16 | 17 | 16 | 15 | 12 | 15 | 14 | 13 | 14 | 16 | 12 | 14 | 14 | 13 | 15 | 14 | 13 | 3  | 4  | 4  | 5  | 3  |
| 72  | EF1ACPI17 | 20 | 19 | 19 | 20 | 21 | 23 | 19 | 19 | 22 | 23 | 22 | 21 | 18 | 21 | 20 | 19 | 20 | 22 | 18 | 20 | 20 | 19 | 21 | 20 | 19 | 7  | 8  | 8  | 9  | 7  |
| 73  | EF1ACPI18 | 44 | 43 | 45 | 43 | 45 | 47 | 43 | 43 | 44 | 45 | 44 | 45 | 42 | 43 | 44 | 43 | 41 | 45 | 41 | 44 | 42 | 41 | 45 | 44 | 43 | 35 | 36 | 36 | 39 | 37 |
| 74  | EF1ACPI19 | 15 | 14 | 14 | 15 | 16 | 18 | 14 | 14 | 17 | 18 | 17 | 16 | 13 | 16 | 15 | 14 | 15 | 17 | 13 | 15 | 15 | 14 | 16 | 15 | 14 | 2  | 3  | 3  | 4  | 2  |
| 75  | EF1ACPI20 | 18 | 17 | 17 | 18 | 19 | 21 | 17 | 17 | 20 | 21 | 20 | 19 | 16 | 19 | 18 | 17 | 18 | 20 | 16 | 18 | 18 | 17 | 19 | 18 | 17 | 5  | 6  | 6  | 7  | 5  |
| 76  | EF1ACPI21 | 15 | 14 | 14 | 15 | 16 | 18 | 14 | 14 | 17 | 18 | 17 | 16 | 13 | 16 | 15 | 14 | 15 | 17 | 13 | 15 | 15 | 14 | 16 | 15 | 14 | 2  | 3  | 3  | 4  | 2  |
| 77  | EF1ACPI22 | 19 | 18 | 18 | 19 | 20 | 22 | 18 | 18 | 21 | 22 | 21 | 20 | 17 | 20 | 19 | 18 | 19 | 21 | 17 | 19 | 19 | 18 | 20 | 19 | 18 | 6  | 7  | 7  | 10 | 8  |
| 78  | EF1ACPI23 | 17 | 16 | 16 | 17 | 18 | 20 | 16 | 16 | 19 | 20 | 19 | 18 | 15 | 18 | 17 | 16 | 17 | 19 | 15 | 17 | 17 | 16 | 18 | 17 | 16 | 4  | 5  | 5  | 8  | 6  |
| 79  | EF1ACPI24 | 15 | 14 | 14 | 15 | 16 | 18 | 14 | 14 | 17 | 16 | 17 | 16 | 13 | 16 | 15 | 14 | 15 | 17 | 13 | 15 | 15 | 14 | 16 | 15 | 14 | 2  | 3  | 3  | 4  | 2  |
| 80  | EF1ACPI25 | 15 | 14 | 14 | 15 | 16 | 18 | 14 | 14 | 17 | 18 | 17 | 16 | 13 | 16 | 15 | 14 | 15 | 17 | 13 | 15 | 15 | 14 | 16 | 15 | 14 | 2  | 3  | 3  | 4  | 2  |
| 81  | EF1ACPI26 | 20 | 19 | 19 | 20 | 21 | 23 | 19 | 19 | 22 | 23 | 22 | 21 | 18 | 21 | 20 | 19 | 20 | 22 | 18 | 20 | 20 | 19 | 21 | 20 | 19 | 7  | 8  | 8  | 9  | 7  |
| 82  | EF1ACPI27 | 18 | 17 | 17 | 18 | 19 | 21 | 17 | 17 | 20 | 21 | 20 | 19 | 16 | 19 | 18 | 17 | 18 | 20 | 16 | 18 | 18 | 17 | 19 | 18 | 17 | 5  | 6  | 6  | 7  | 5  |
| 83  | EF1ACPI28 | 15 | 14 | 14 | 15 | 16 | 18 | 14 | 14 | 17 | 18 | 17 | 16 | 13 | 16 | 15 | 14 | 15 | 17 | 13 | 15 | 15 | 14 | 16 | 15 | 14 | 2  | 3  | 3  | 4  | 2  |
| 84  | EF1ACPI29 | 15 | 14 | 14 | 15 | 16 | 18 | 14 | 14 | 17 | 18 | 17 | 16 | 13 | 16 | 15 | 14 | 15 | 17 | 13 | 15 | 15 | 14 | 16 | 15 | 14 | 2  | 3  | 3  | 4  | 2  |
| 85  | EF1ACPI30 | 17 | 16 | 16 | 17 | 18 | 20 | 16 | 16 | 19 | 20 | 19 | 18 | 15 | 18 | 17 | 16 | 17 | 19 | 15 | 17 | 17 | 16 | 18 | 17 | 16 | 4  | 5  | 5  | 8  | 6  |
| 86  | EF1ACPI31 | 15 | 14 | 14 | 15 | 16 | 18 | 14 | 14 | 17 | 18 | 17 | 16 | 13 | 16 | 15 | 14 | 15 | 17 | 13 | 15 | 15 | 14 | 16 | 15 | 14 | 2  | 3  | 3  | 6  | 4  |
| 87  | EF1ACPI32 | 16 | 15 | 15 | 16 | 17 | 19 | 15 | 15 | 18 | 19 | 18 | 17 | 14 | 17 | 16 | 15 | 16 | 18 | 14 | 16 | 16 | 15 | 17 | 16 | 15 | 3  | 4  | 4  | 5  | 3  |
| 88  | EF1ACPI33 | 15 | 14 | 14 | 15 | 16 | 18 | 14 | 14 | 17 | 18 | 17 | 16 | 13 | 16 | 15 | 14 | 15 | 17 | 13 | 15 | 15 | 14 | 16 | 15 | 14 | 2  | 3  | 3  | 4  | 2  |
| 89  | EF1ACPI34 | 16 | 15 | 15 | 16 | 17 | 19 | 15 | 15 | 18 | 19 | 18 | 17 | 14 | 17 | 16 | 15 | 16 | 18 | 14 | 16 | 16 | 15 | 17 | 16 | 15 | 3  | 4  | 4  | 5  | 3  |
| 90  | EF1ACPI35 | 16 | 15 | 15 | 16 | 17 | 19 | 15 | 15 | 18 | 19 | 18 | 17 | 14 | 17 | 16 | 15 | 16 | 18 | 14 | 16 | 16 | 15 | 17 | 16 | 15 | 3  | 4  | 4  | 5  | 3  |
| 91  | EF1ACPI36 | 15 | 14 | 14 | 15 | 16 | 18 | 14 | 14 | 17 | 18 | 17 | 16 | 13 | 16 | 15 | 14 | 15 | 17 | 13 | 15 | 15 | 14 | 16 | 15 | 14 | 2  | 3  | 3  | 4  | 2  |
| 92  | EF1ACPI37 | 17 | 16 | 16 | 17 | 18 | 20 | 16 | 16 | 19 | 20 | 19 | 18 | 15 | 18 | 17 | 16 | 17 | 19 | 15 | 17 | 17 | 16 | 18 | 17 | 16 | 4  | 5  | 5  | 6  | 4  |
| 93  | EF1ACPI38 | 17 | 16 | 16 | 17 | 18 | 20 | 16 | 16 | 19 | 20 | 19 | 18 | 15 | 18 | 17 | 16 | 17 | 19 | 15 | 17 | 17 | 16 | 18 | 17 | 16 | 4  | 5  | 5  | 6  | 4  |
| 94  | EF1ACPI39 | 16 | 15 | 15 | 16 | 17 | 19 | 15 | 15 | 18 | 19 | 18 | 17 | 14 | 17 | 16 | 15 | 16 | 18 | 14 | 16 | 16 | 15 | 17 | 16 | 15 | 3  | 4  | 4  | 5  | 3  |
| 95  | EF1ACPI40 | 20 | 19 | 19 | 20 | 21 | 23 | 19 | 19 | 22 | 23 | 22 | 21 | 18 | 21 | 20 | 19 | 20 | 22 | 18 | 20 | 20 | 19 | 21 | 20 | 19 | 7  | 8  | 8  | 9  | 7  |
| 96  | EF1ACPI41 | 16 | 15 | 15 | 16 | 17 | 19 | 15 | 15 | 18 | 19 | 18 | 17 | 14 | 17 | 16 | 15 | 16 | 18 | 14 | 16 | 16 | 15 | 17 | 16 | 15 | 3  | 4  | 4  | 5  | 3  |
| 97  | EF1ACPI42 | 19 | 18 | 18 | 19 | 20 | 22 | 18 | 18 | 21 | 22 | 21 | 20 | 17 | 20 | 19 | 18 | 19 | 21 | 17 | 19 | 19 | 18 | 20 | 19 | 18 | 6  | 7  | 7  | 8  | 6  |
| 98  | PI1       | 17 | 16 | 16 | 17 | 18 | 20 | 16 | 16 | 19 | 20 | 19 | 18 | 15 | 18 | 17 | 16 | 17 | 19 | 15 | 17 | 17 | 16 | 18 | 17 | 16 | 4  | 5  | 5  | 6  | 4  |
| 99  | PI2       | 19 | 18 | 18 | 19 | 20 | 22 | 18 | 18 | 21 | 22 | 21 | 20 | 17 | 20 | 19 | 18 | 19 | 21 | 17 | 19 | 19 | 18 | 20 | 19 | 18 | 6  | 7  | 7  | 8  | 6  |
| 100 | PI3       | 16 | 15 | 15 | 16 | 17 | 19 | 15 | 15 | 18 | 19 | 18 | 17 | 14 | 17 | 16 | 15 | 16 | 18 | 14 | 16 | 16 | 15 | 17 | 16 | 15 | 3  | 4  | 4  | 5  | 3  |
| 101 | PI4       | 18 | 17 | 17 | 18 | 19 | 21 | 17 | 17 | 20 | 21 | 20 | 19 | 16 | 19 | 18 | 17 | 18 | 20 | 16 | 18 | 18 | 17 | 19 | 18 | 17 | 6  | 7  | 7  | 8  | 6  |
| 102 | PI5       | 15 | 14 | 14 | 15 | 16 | 18 | 14 | 14 | 17 | 17 | 17 | 16 | 13 | 16 | 15 | 14 | 15 | 17 | 13 | 15 | 15 | 14 | 16 | 15 | 14 | 4  | 5  | 5  | 6  | 4  |
| 103 | PI6       | 18 | 17 | 17 | 18 | 19 | 21 | 17 | 17 | 20 | 21 | 20 | 19 | 16 | 19 | 18 | 17 | 18 | 20 | 16 | 18 | 18 | 17 | 19 | 18 | 17 | 5  | 6  | 6  | 7  | 5  |
| 104 | PU1       | 7  | 6  | 8  | 7  | 8  | 10 | 6  | 7  | 9  | 10 | 9  | 8  | 5  | 8  | 7  | 6  | 5  | 9  | 5  | 7  | 7  | 6  | 8  | 7  | 6  | 13 | 14 | 14 | 17 | 15 |
| 105 | PU2       | 6  | 5  | 7  | 6  | 7  | 9  | 5  | 6  | 10 | 11 | 10 | 7  | 6  | 9  | 8  | 7  | 8  | 8  | 6  | 6  | 8  | 7  | 7  | 6  | 5  | 15 | 16 | 16 | 19 | 17 |
| 106 | PU3       | 4  | 3  | 5  | 4  | 5  | 7  | 3  | 4  | 8  | 9  | 8  | 5  | 4  | 7  | 6  | 5  | 6  | 5  | 4  | 4  | 6  | 5  | 5  | 4  | 3  | 13 | 14 | 14 | 17 | 15 |
| 107 | PU4       | 6  | 5  | 7  | 6  | 7  | 9  | 5  | 6  | 10 | 11 | 10 | 7  | 6  | 9  | 8  | 7  | 8  | 8  | 6  | 6  | 8  | 7  | 7  | 6  | 5  | 15 | 16 | 16 | 19 | 17 |
| 108 | PU5       | 4  | 3  | 5  | 4  | 5  | 7  | 3  | 4  | 8  | 9  | 8  | 5  | 4  | 7  | 6  | 5  | 6  | 6  | 4  | 4  | 6  | 5  | 5  | 4  | 3  | 13 | 14 | 14 | 17 | 15 |
| 109 | PU6       | 6  | 5  | 7  | 6  | 7  | 9  | 5  | 6  | 4  | 5  | 4  | 7  | 4  | 5  | 6  | 5  | 6  | 8  | 4  | 6  | 6  | 5  | 7  | 6  | 5  | 13 | 14 | 14 | 17 | 15 |
| 110 | PU7       | 7  | 6  | 8  | 7  | 8  | 10 | 6  | 7  | 9  | 10 | 9  | 8  | 3  | 8  | 7  | 6  | 7  | 9  | 5  | 7  | 7  | 6  | 8  | 7  | 6  | 14 | 15 | 15 | 18 | 16 |

|    |           | 61   | 62   | 63   | 64   | 65   | 66   | 67   | 68   | 69   | 70   | 71   | 72   | 73   | 74   | 75   | 76   | 77   | 78   | 79   | 80   | 81   | 82   | 83   | 84   | 85   | 86   | 87   | 88   | 89   | 90   |
|----|-----------|------|------|------|------|------|------|------|------|------|------|------|------|------|------|------|------|------|------|------|------|------|------|------|------|------|------|------|------|------|------|
| 1  | EFIACPU01 | 1.90 | 1.65 | 1.78 | 1.65 | 1.90 | 1.02 | 1.52 | 1.65 | 1.65 | 1.78 | 1.52 | 2.28 | 5.33 | 1.65 | 2.03 | 1.65 | 2.16 | 1.90 | 1.65 | 1.65 | 2.28 | 2.03 | 1.65 | 1.65 | 1.90 | 1.65 | 1.78 | 1.65 | 1.78 | 1.78 |
| 2  | EFIACPU02 | 2.03 | 1.78 | 1.90 | 1.78 | 2.03 | 1.14 | 1.65 | 1.78 | 1.78 | 1.90 | 1.65 | 2.41 | 5.46 | 1.78 | 2.16 | 1.78 | 2.28 | 2.03 | 1.78 | 1.78 | 2.41 | 2.16 | 1.78 | 1.78 | 2.03 | 1.78 | 1.90 | 1.78 | 1.90 | 1.90 |
| 3  | EFIACPU03 | 2.16 | 1.90 | 2.03 | 1.90 | 2.16 | 1.27 | 1.78 | 1.90 | 1.90 | 2.03 | 1.78 | 2.54 | 5.58 | 1.90 | 2.28 | 1.90 | 2.41 | 2.16 | 1.90 | 1.90 | 2.54 | 2.28 | 1.90 | 1.90 | 2.16 | 1.90 | 2.03 | 1.90 | 2.03 | 2.03 |
| 4  | EFIACPU04 | 2.03 | 1.78 | 1.90 | 1.78 | 2.03 | 1.14 | 1.65 | 1.78 | 1.78 | 1.90 | 1.65 | 2.41 | 5.46 | 1.78 | 2.16 | 1.78 | 2.28 | 2.03 | 1.78 | 1.78 | 2.41 | 2.16 | 1.78 | 1.78 | 2.03 | 1.78 | 1.90 | 1.78 | 1.90 | 1.90 |
| 5  | EFIACPU05 | 2.03 | 1.78 | 1.90 | 1.78 | 2.03 | 1.14 | 1.65 | 1.78 | 1.78 | 1.90 | 1.65 | 2.41 | 5.46 | 1.78 | 2.16 | 1.78 | 2.28 | 2.03 | 1.78 | 1.78 | 2.41 | 2.16 | 1.78 | 1.78 | 2.03 | 1.78 | 1.90 | 1.78 | 1.90 | 1.90 |
| 6  | EFIACPU06 | 2.41 | 2.16 | 2.28 | 2.16 | 2.41 | 1.52 | 2.03 | 2.16 | 2.16 | 2.28 | 2.03 | 2.79 | 5.71 | 2.16 | 2.54 | 2.16 | 2.67 | 2.41 | 2.16 | 2.16 | 2.79 | 2.54 | 2.16 | 2.16 | 2.41 | 2.16 | 2.28 | 2.16 | 2.28 | 2.28 |
| 7  | EFIACPU07 | 2.16 | 1.90 | 2.03 | 1.90 | 2.16 | 1.27 | 1.78 | 1.90 | 1.90 | 2.03 | 1.78 | 2.54 | 5.46 | 1.90 | 2.28 | 1.90 | 2.41 | 2.16 | 1.90 | 1.90 | 2.54 | 2.28 | 1.90 | 1.90 | 2.16 | 1.90 | 2.03 | 1.90 | 2.03 | 2.03 |
| 8  | EFIACPU08 | 2.16 | 1.90 | 2.03 | 1.90 | 2.16 | 1.27 | 1.78 | 1.90 | 1.90 | 2.03 | 1.78 | 2.54 | 5.46 | 1.90 | 2.28 | 1.90 | 2.41 | 2.16 | 1.90 | 1.90 | 2.54 | 2.28 | 1.90 | 1.90 | 2.16 | 1.90 | 2.03 | 1.90 | 2.03 | 2.03 |
| 9  | EFIACPU09 | 2.28 | 2.03 | 2.16 | 2.03 | 2.28 | 1.40 | 1.90 | 2.03 | 2.03 | 2.16 | 1.90 | 2.67 | 5.58 | 2.03 | 2.41 | 2.03 | 2.54 | 2.28 | 2.03 | 2.03 | 2.67 | 2.41 | 2.03 | 2.03 | 2.28 | 2.03 | 2.16 | 2.03 | 2.16 | 2.16 |
| 10 | EFIACPU10 | 2.03 | 1.78 | 1.90 | 1.78 | 2.03 | 1.14 | 1.65 | 1.78 | 1.78 | 1.90 | 1.65 | 2.41 | 5.46 | 1.78 | 2.16 | 1.78 | 2.28 | 2.03 | 1.78 | 1.78 | 2.41 | 2.16 | 1.78 | 1.78 | 2.03 | 1.78 | 1.90 | 1.78 | 1.90 | 1.90 |
| 11 | EFIACPU11 | 2.28 | 2.03 | 2.16 | 2.03 | 2.28 | 1.40 | 1.90 | 2.03 | 2.03 | 2.16 | 1.90 | 2.67 | 5.33 | 2.03 | 2.41 | 2.03 | 2.54 | 2.28 | 2.03 | 2.03 | 2.67 | 2.41 | 2.03 | 2.03 | 2.28 | 2.03 | 2.16 | 2.03 | 2.16 | 2.16 |
| 12 | EFIACPU12 | 2.41 | 2.16 | 2.28 | 2.16 | 2.41 | 1.52 | 2.03 | 2.16 | 2.16 | 2.28 | 2.03 | 2.79 | 5.58 | 2.16 | 2.54 | 2.16 | 2.67 | 2.41 | 2.16 | 2.16 | 2.79 | 2.54 | 2.16 | 2.16 | 2.41 | 2.16 | 2.28 | 2.16 | 2.28 | 2.28 |
| 13 | EFIACPU13 | 2.03 | 1.78 | 1.90 | 1.78 | 2.03 | 1.14 | 1.65 | 1.78 | 1.78 | 1.90 | 1.65 | 2.41 | 5.20 | 1.78 | 2.16 | 1.78 | 2.28 | 2.03 | 1.78 | 1.78 | 2.41 | 2.16 | 1.78 | 1.78 | 2.03 | 1.78 | 1.90 | 1.78 | 1.90 | 1.90 |
| 14 | EFIACPU14 | 1.90 | 1.65 | 1.78 | 1.65 | 1.90 | 1.02 | 1.52 | 1.65 | 1.65 | 1.78 | 1.52 | 2.28 | 5.33 | 1.65 | 2.03 | 1.65 | 2.16 | 1.90 | 1.65 | 1.65 | 2.28 | 2.03 | 1.65 | 1.65 | 1.90 | 1.65 | 1.78 | 1.65 | 1.78 | 1.78 |
| 15 | EFIACPU15 | 1.90 | 1.65 | 1.78 | 1.65 | 1.90 | 1.02 | 1.52 | 1.65 | 1.65 | 1.78 | 1.52 | 2.28 | 5.33 | 1.65 | 2.03 | 1.65 | 2.16 | 1.90 | 1.65 | 1.65 | 2.28 | 2.03 | 1.65 | 1.65 | 1.90 | 1.65 | 1.78 | 1.65 | 1.78 | 1.78 |
| 16 | EFIACPU16 | 2.03 | 1.78 | 1.90 | 1.78 | 2.03 | 1.14 | 1.65 | 1.78 | 1.78 | 1.90 | 1.65 | 2.41 | 5.46 | 1.78 | 2.16 | 1.78 | 2.28 | 2.03 | 1.78 | 1.78 | 2.41 | 2.16 | 1.78 | 1.78 | 2.03 | 1.78 | 1.90 | 1.78 | 1.90 | 1.90 |
| 17 | EFIACPU17 | 2.03 | 1.78 | 1.90 | 1.78 | 2.03 | 1.14 | 1.65 | 1.78 | 1.78 | 1.90 | 1.65 | 2.41 | 5.46 | 1.78 | 2.16 | 1.78 | 2.28 | 2.03 | 1.78 | 1.78 | 2.41 | 2.16 | 1.78 | 1.78 | 2.03 | 1.78 | 1.90 | 1.78 | 1.90 | 1.90 |
| 18 | EFIACPU18 | 2.03 | 1.78 | 1.90 | 1.78 | 2.03 | 1.14 | 1.65 | 1.78 | 1.78 | 1.90 | 1.65 | 2.41 | 5.46 | 1.78 | 2.16 | 1.78 | 2.28 | 2.03 | 1.78 | 1.78 | 2.41 | 2.16 | 1.78 | 1.78 | 2.03 | 1.78 | 1.90 | 1.78 | 1.90 | 1.90 |
| 19 | EFIACPU19 | 1.90 | 1.65 | 1.78 | 1.65 | 1.90 | 1.02 | 1.52 | 1.65 | 1.65 | 1.78 | 1.52 | 2.28 | 5.08 | 1.65 | 2.03 | 1.65 | 2.16 | 1.90 | 1.65 | 1.65 | 2.28 | 2.03 | 1.65 | 1.65 | 1.90 | 1.65 | 1.78 | 1.65 | 1.78 | 1.78 |
| 20 | EFIACPU20 | 2.41 | 2.16 | 2.28 | 2.16 | 2.41 | 1.52 | 2.03 | 2.16 | 2.16 | 2.28 | 2.03 | 2.79 | 5.84 | 2.16 | 2.54 | 2.16 | 2.67 | 2.41 | 2.16 | 2.16 | 2.79 | 2.54 | 2.16 | 2.16 | 2.41 | 2.16 | 2.28 | 2.16 | 2.28 | 2.28 |
| 21 | EFIACPU21 | 2.54 | 2.28 | 2.41 | 2.28 | 2.54 | 1.65 | 2.16 | 2.28 | 2.28 | 2.41 | 2.16 | 2.92 | 5.58 | 2.28 | 2.67 | 2.28 | 2.79 | 2.54 | 2.28 | 2.28 | 2.92 | 2.67 | 2.28 | 2.28 | 2.54 | 2.28 | 2.41 | 2.28 | 2.41 | 2.41 |
| 22 | EFIACPU22 | 2.03 | 1.78 | 1.90 | 1.78 | 2.03 | 1.14 | 1.65 | 1.78 | 1.78 | 1.90 | 1.65 | 2.41 | 5.46 | 1.78 | 2.16 | 1.78 | 2.28 | 2.03 | 1.78 | 1.78 | 2.41 | 2.16 | 1.78 | 1.78 | 2.03 | 1.78 | 1.90 | 1.78 | 1.90 | 1.90 |
| 23 | EFIACPU23 | 2.03 | 1.78 | 1.90 | 1.78 | 2.03 | 1.14 | 1.65 | 1.78 | 1.78 | 1.90 | 1.65 | 2.41 | 5.46 | 1.78 | 2.16 | 1.78 | 2.28 | 2.03 | 1.78 | 1.78 | 2.41 | 2.16 | 1.78 | 1.78 | 2.03 | 1.78 | 1.90 | 1.78 | 1.90 | 1.90 |
| 24 | EFIACPU24 | 2.28 | 2.03 | 2.16 | 2.03 | 2.28 | 1.40 | 1.90 | 2.03 | 2.03 | 2.16 | 1.90 | 2.67 | 5.71 | 2.03 | 2.41 | 2.03 | 2.54 | 2.28 | 2.03 | 2.03 | 2.54 | 2.41 | 2.03 | 2.03 | 2.28 | 2.03 | 2.16 | 2.03 | 2.16 | 2.16 |
| 25 | EFIACPU25 | 2.03 | 1.78 | 1.90 | 1.78 | 2.03 | 1.14 | 1.65 | 1.78 | 1.78 | 1.90 | 1.65 | 2.41 | 5.20 | 1.78 | 2.16 | 1.78 | 2.28 | 2.03 | 1.78 | 1.78 | 2.41 | 2.16 | 1.78 | 1.78 | 2.03 | 1.78 | 1.90 | 1.78 | 1.90 | 1.90 |
| 26 | EFIACPU26 | 2.16 | 1.90 | 2.03 | 1.90 | 2.16 | 1.27 | 1.78 | 1.90 | 1.90 | 2.03 | 1.78 | 2.54 | 5.08 | 1.90 | 2.28 | 1.90 | 2.41 | 2.16 | 1.90 | 1.90 | 2.54 | 2.28 | 1.90 | 1.90 | 2.16 | 1.90 | 2.03 | 1.90 | 2.03 | 2.03 |
| 27 | EFIACPU27 | 2.16 | 1.90 | 2.03 | 1.90 | 2.16 | 1.27 | 1.78 | 1.90 | 1.90 | 2.03 | 1.78 | 2.54 | 5.58 | 1.90 | 2.28 | 1.90 | 2.41 | 2.16 | 1.90 | 1.90 | 2.54 | 2.28 | 1.90 | 1.90 | 2.16 | 1.90 | 1.78 | 1.90 | 2.03 | 2.03 |
| 28 | EFIACPU28 | 2.16 | 1.90 | 2.03 | 1.90 | 2.16 | 1.27 | 1.78 | 1.90 | 1.90 | 2.03 | 1.78 | 2.54 | 5.58 | 1.90 | 2.28 | 1.90 | 2.41 | 2.16 | 1.90 | 1.90 | 2.54 | 2.28 | 1.90 | 1.90 | 2.16 | 1.90 | 2.03 | 1.90 | 2.03 | 2.03 |
| 29 | EFIACPU29 | 2.16 | 1.90 | 2.03 | 1.90 | 2.16 | 1.27 | 1.78 | 1.90 | 1.90 | 2.03 | 1.78 | 2.54 | 5.58 | 1.90 | 2.28 | 1.90 | 2.41 | 2.16 | 1.90 | 1.90 | 2.54 | 2.28 | 1.90 | 1.90 | 2.16 | 1.90 | 2.03 | 1.90 | 2.03 | 2.03 |
| 30 | EFIACPU30 | 2.03 | 1.78 | 1.90 | 1.78 | 2.03 | 1.14 | 1.65 | 1.78 | 1.78 | 1.90 | 1.65 | 2.41 | 5.46 | 1.78 | 2.16 | 1.78 | 2.28 | 2.03 | 1.78 | 1.78 | 2.41 | 2.16 | 1.78 | 1.78 | 2.03 | 1.78 | 1.90 | 1.78 | 1.90 | 1.90 |
| 31 | EFIACPU31 | 2.16 | 1.90 | 2.03 | 1.90 | 2.16 | 1.27 | 1.78 | 1.90 | 1.90 | 2.03 | 1.78 | 2.54 | 5.58 | 1.90 | 2.28 | 1.90 | 2.41 | 2.16 | 1.90 | 1.90 | 2.54 | 2.28 | 1.90 | 1.90 | 2.16 | 1.90 | 2.03 | 1.90 | 2.03 | 2.03 |
| 32 | EFIACPU32 | 2.03 | 1.78 | 1.90 | 1.78 | 2.03 | 1.14 | 1.65 | 1.78 | 1.78 | 1.90 | 1.65 | 2.41 | 5.46 | 1.78 | 2.16 | 1.78 | 2.28 | 2.03 | 1.78 | 1.78 | 2.41 | 2.16 | 1.78 | 1.78 | 2.03 | 1.78 | 1.90 | 1.78 | 1.90 | 1.90 |
| 33 | EFIACPU33 | 2.03 | 1.78 | 1.90 | 1.78 | 2.03 | 1.40 | 1.65 | 1.78 | 1.78 | 1.90 | 1.65 | 2.41 | 5.71 | 1.78 | 2.16 | 1.78 | 2.28 | 2.03 | 1.78 | 1.78 | 2.41 | 2.16 | 1.78 | 1.78 | 2.03 | 1.78 | 1.90 | 1.78 | 1.90 | 1.90 |
| 34 | EFIACPU34 | 2.16 | 1.90 | 2.03 | 1.90 | 2.16 | 1.27 | 1.78 | 1.90 | 1.90 | 2.03 | 1.78 | 2.54 | 5.46 | 1.90 | 2.28 | 1.90 | 2.41 | 2.16 | 1.90 | 1.90 | 2.54 | 2.28 | 1.90 | 1.90 | 2.16 | 1.90 | 2.03 | 1.90 | 2.03 | 2.03 |
| 35 | EFIACPU35 | 2.28 | 2.03 | 2.16 | 2.03 | 2.28 | 1.40 | 1.90 | 2.03 | 2.03 | 2.16 | 1.90 | 2.67 | 5.71 | 2.03 | 2.41 | 2.03 | 2.54 | 2.28 | 2.03 | 2.03 | 2.67 | 2.41 | 2.03 | 2.03 | 2.28 | 2.03 | 2.16 | 2.03 | 2.16 | 2.16 |
| 36 | EFIACPU36 | 2.54 | 2.28 | 2.41 | 2.28 | 2.54 | 1.65 | 2.16 | 2.28 | 2.28 | 2.41 | 2.16 | 2.92 | 5.96 | 2.28 | 2.67 | 2.28 | 2.79 | 2.54 | 2.28 | 2.28 | 2.92 | 2.67 | 2.28 | 2.28 | 2.54 | 2.28 | 2.41 | 2.28 | 2.41 | 2.41 |
| 37 | EFIACPU37 | 2.03 | 1.78 | 1.90 | 1.78 | 2.03 | 1.14 | 1.65 | 1.78 | 1.78 | 1.90 | 1.65 | 2.41 | 5.46 | 1.78 | 2.16 | 1.78 | 2.28 | 2.03 | 1.78 | 1.78 | 2.41 | 2.16 | 1.78 | 1.78 | 2.03 | 1.78 | 1.90 | 1.78 | 1.90 | 1.90 |
| 38 | EFIACPU38 | 2.03 | 1.78 | 1.90 | 1.78 | 2.03 | 1.27 | 1.65 | 1.78 | 1.78 | 1.90 | 1.65 | 2.41 | 5.46 | 1.78 | 2.16 | 1.78 | 2.28 | 2.03 | 1.78 | 1.78 | 2.41 | 2.16 | 1.78 | 1.78 | 2.03 | 1.78 | 1.90 | 1.78 | 1.90 | 1.90 |
| 39 | EFIACPU39 | 2.41 | 2.16 | 2.28 | 2.16 | 2.41 | 1.52 | 2.03 | 2.16 | 2.16 | 2.28 | 2.03 | 2.79 | 5.58 | 2.16 | 2.54 | 2.16 | 2.67 | 2.41 | 2.16 | 2.16 | 2.79 | 2.54 | 2.16 | 2.16 | 2.41 | 2.16 | 2.28 | 2.16 | 2.28 | 2.28 |
| 40 | EFIACPU40 | 2.54 | 2.28 | 2.41 | 2.28 | 2.54 | 1.65 | 2.16 | 2.28 | 2.28 | 2.41 | 2.16 | 2.92 | 5.71 | 2.28 | 2.67 | 2.28 | 2.79 | 2.54 | 2.03 | 2.28 | 2.92 | 2.67 | 2.28 | 2.28 | 2.54 | 2.28 | 2.41 | 2.28 | 2.41 | 2.41 |
| 41 | EFIACPU41 | 2.41 | 2.16 | 2.28 | 2.16 | 2.41 | 1.52 | 2.03 | 2.16 | 2.16 | 2.28 | 2.03 | 2.79 | 5.58 | 2.16 | 2.54 | 2.16 | 2.67 | 2.41 | 2.16 | 2.16 | 2.79 | 2.54 | 2.16 | 2.16 | 2.41 | 2.16 | 2.28 | 2.16 | 2.28 | 2.28 |
| 42 | EFIACPU42 | 2.28 | 2.03 | 2.16 | 2.03 | 2.28 | 1.40 | 1.90 | 2.03 | 2.03 | 2.16 | 1.90 | 2.67 | 5.71 | 2.03 | 2.41 | 2.03 | 2.54 | 2.28 | 2.03 | 2.03 | 2.67 | 2.41 | 2.03 | 2.03 | 2    |      |      |      |      |      |



|     |           |      |      |      |      |      |      |      |      |      |      |      |      |      |      |      |      |       |      |      |       |      |      |      |      |      |      |      |      |       |      |
|-----|-----------|------|------|------|------|------|------|------|------|------|------|------|------|------|------|------|------|-------|------|------|-------|------|------|------|------|------|------|------|------|-------|------|
| 60  | EF1ACPI05 | 0.51 | 0.25 | 0.38 | 0.25 | 0.51 | 1.40 | 0.13 | 0.25 | 0.25 | 0.38 | 0.38 | 0.89 | 4.70 | 0.25 | 0.64 | 0.25 | 1.02  | 0.76 | 0.25 | 0.25  | 0.89 | 0.64 | 0.25 | 0.25 | 0.76 | 0.51 | 0.38 | 0.25 | 0.38  | 0.38 |
| 61  | EF1ACPI06 | -    | 0.51 | 0.64 | 0.51 | 0.76 | 1.65 | 0.38 | 0.51 | 0.51 | 0.64 | 0.64 | 1.14 | 4.95 | 0.51 | 0.89 | 0.51 | 1.27  | 1.02 | 0.51 | 0.51  | 1.14 | 0.89 | 0.51 | 0.51 | 1.02 | 0.76 | 0.64 | 0.51 | 0.64  | 0.64 |
| 62  | EF1ACPI07 | 4    | -    | 0.38 | 0.25 | 0.51 | 1.40 | 0.13 | 0.25 | 0.25 | 0.38 | 0.38 | 0.89 | 4.70 | 0.25 | 0.64 | 0.25 | 1.02  | 0.76 | 0.25 | 0.25  | 0.89 | 0.64 | 0.25 | 0.25 | 0.76 | 0.51 | 0.38 | 0.25 | 0.38  | 0.38 |
| 63  | EF1ACPI08 | 5    | 3    | -    | 0.38 | 0.51 | 1.52 | 0.25 | 0.38 | 0.38 | 0.51 | 0.51 | 1.02 | 4.82 | 0.38 | 0.76 | 0.38 | 1.14  | 0.89 | 0.38 | 0.38  | 1.02 | 0.76 | 0.38 | 0.38 | 0.89 | 0.64 | 0.51 | 0.38 | 0.51  | 0.51 |
| 64  | EF1ACPI09 | 4    | 2    | 3    | -    | 0.51 | 1.40 | 0.13 | 0.25 | 0.25 | 0.38 | 0.38 | 0.89 | 4.70 | 0.25 | 0.64 | 0.25 | 1.02  | 0.76 | 0.25 | 0.25  | 0.89 | 0.64 | 0.25 | 0.25 | 0.76 | 0.51 | 0.38 | 0.25 | 0.38  | 0.38 |
| 65  | EF1ACPI10 | 6    | 4    | 4    | 4    | -    | 1.65 | 0.38 | 0.51 | 0.51 | 0.64 | 0.64 | 1.14 | 4.95 | 0.51 | 0.89 | 0.51 | 1.27  | 1.02 | 0.51 | 0.51  | 1.14 | 0.89 | 0.51 | 0.51 | 1.02 | 0.76 | 0.64 | 0.51 | 0.64  | 0.64 |
| 66  | EF1ACPI11 | 13   | 11   | 12   | 11   | 13   | -    | 1.27 | 1.40 | 1.40 | 1.52 | 1.27 | 2.03 | 4.95 | 1.40 | 1.78 | 1.40 | 1.90  | 1.65 | 1.40 | 1.40  | 2.03 | 1.78 | 1.40 | 1.40 | 1.65 | 1.40 | 1.52 | 1.40 | 1.52  | 1.52 |
| 67  | EF1ACPI12 | 3    | 1    | 2    | 1    | 3    | 10   | -    | 0.13 | 0.13 | 0.25 | 0.25 | 0.76 | 4.57 | 0.13 | 0.51 | 0.13 | 0.89  | 0.64 | 0.13 | 0.13  | 0.76 | 0.51 | 0.13 | 0.13 | 0.64 | 0.38 | 0.25 | 0.13 | 0.25  | 0.25 |
| 68  | EF1ACPI13 | 4    | 2    | 3    | 2    | 4    | 11   | 1    | -    | 0.25 | 0.38 | 0.38 | 0.89 | 4.70 | 0.25 | 0.64 | 0.25 | 1.02  | 0.76 | 0.25 | 0.25  | 0.89 | 0.64 | 0.25 | 0.25 | 0.76 | 0.51 | 0.38 | 0.25 | 0.38  | 0.38 |
| 69  | EF1ACPI14 | 4    | 2    | 3    | 2    | 4    | 11   | 1    | 2    | -    | 0.38 | 0.38 | 0.89 | 4.70 | 0.25 | 0.64 | 0.25 | 1.02  | 0.76 | 0.25 | 0.25  | 0.89 | 0.64 | 0.25 | 0.25 | 0.76 | 0.51 | 0.38 | 0.25 | 0.38  | 0.38 |
| 70  | EF1ACPI15 | 5    | 3    | 4    | 3    | 5    | 12   | 2    | 3    | 3    | -    | 0.51 | 1.02 | 4.82 | 0.38 | 0.76 | 0.38 | 1.14  | 0.89 | 0.38 | 0.38  | 1.02 | 0.76 | 0.38 | 0.38 | 0.89 | 0.64 | 0.51 | 0.38 | 0.51  | 0.51 |
| 71  | EF1ACPI16 | 5    | 3    | 4    | 3    | 5    | 10   | 2    | 3    | 3    | 4    | -    | 0.76 | 4.82 | 0.38 | 0.76 | 0.38 | 1.02  | 0.89 | 0.38 | 0.38  | 1.02 | 0.51 | 0.38 | 0.38 | 0.89 | 0.64 | 0.51 | 0.38 | 0.51  | 0.51 |
| 72  | EF1ACPI17 | 9    | 7    | 8    | 7    | 9    | 16   | 6    | 7    | 7    | 8    | 6    | -    | 5.33 | 0.89 | 1.27 | 0.89 | 1.52  | 1.40 | 0.89 | 0.89  | 1.52 | 1.02 | 0.89 | 0.89 | 1.40 | 1.14 | 1.02 | 0.89 | 1.02  | 1.02 |
| 73  | EF1ACPI18 | 39   | 37   | 38   | 37   | 39   | 39   | 36   | 37   | 37   | 38   | 38   | 42   | -    | 4.70 | 5.08 | 4.70 | 5.20  | 4.95 | 4.70 | 4.70  | 5.33 | 5.08 | 4.70 | 4.70 | 4.95 | 4.70 | 4.82 | 4.70 | 4.82  | 4.82 |
| 74  | EF1ACPI19 | 4    | 2    | 3    | 2    | 4    | 11   | 1    | 2    | 2    | 3    | 3    | 7    | 37   | -    | 0.64 | 0.25 | 1.02  | 0.76 | 0.25 | 0.25  | 0.89 | 0.64 | 0.25 | 0.25 | 0.76 | 0.51 | 0.38 | 0.25 | 0.38  | 0.38 |
| 75  | EF1ACPI20 | 7    | 5    | 6    | 5    | 7    | 14   | 4    | 5    | 5    | 6    | 6    | 10   | 40   | 5    | -    | 0.38 | 1.40  | 1.14 | 0.64 | 0.64  | 1.27 | 1.02 | 0.64 | 0.64 | 1.14 | 0.89 | 0.76 | 0.64 | 0.76  | 0.76 |
| 76  | EF1ACPI21 | 4    | 2    | 3    | 2    | 4    | 11   | 1    | 2    | 2    | 3    | 3    | 7    | 37   | 2    | 3    | -    | 1.015 | 0.76 | 0.25 | 0.25  | 0.89 | 0.64 | 0.25 | 0.25 | 0.76 | 0.51 | 0.38 | 0.25 | 0.38  | 0.38 |
| 77  | EF1ACPI22 | 10   | 8    | 9    | 8    | 10   | 15   | 7    | 8    | 8    | 9    | 8    | 12   | 41   | 8    | 11   | 8    | -     | 0.76 | 1.02 | 1.02  | 1.65 | 1.27 | 1.02 | 1.02 | 0.76 | 0.51 | 1.14 | 1.02 | 1.14  | 1.14 |
| 78  | EF1ACPI23 | 8    | 6    | 7    | 6    | 8    | 13   | 5    | 6    | 6    | 7    | 7    | 11   | 39   | 6    | 9    | 6    | 6     | -    | 0.76 | 0.76  | 1.40 | 1.14 | 0.76 | 0.76 | 0.51 | 0.25 | 0.89 | 0.76 | 0.89  | 0.89 |
| 79  | EF1ACPI24 | 4    | 2    | 3    | 2    | 4    | 11   | 1    | 2    | 2    | 3    | 3    | 7    | 37   | 2    | 5    | 2    | 8     | 6    | -    | 0.254 | 0.89 | 0.64 | 0.25 | 0.25 | 0.76 | 0.51 | 0.38 | 0.25 | 0.38  | 0.38 |
| 80  | EF1ACPI25 | 4    | 2    | 3    | 2    | 4    | 11   | 1    | 2    | 2    | 3    | 3    | 7    | 37   | 2    | 5    | 2    | 8     | 6    | 2    | -     | 0.89 | 0.64 | 0.25 | 0.25 | 0.76 | 0.51 | 0.38 | 0.25 | 0.38  | 0.38 |
| 81  | EF1ACPI26 | 9    | 7    | 8    | 7    | 9    | 16   | 6    | 7    | 7    | 8    | 8    | 12   | 42   | 7    | 10   | 7    | 13    | 11   | 7    | 7     | -    | 1.27 | 0.89 | 0.89 | 1.40 | 1.14 | 1.02 | 0.89 | 1.02  | 1.02 |
| 82  | EF1ACPI27 | 7    | 5    | 6    | 5    | 7    | 14   | 4    | 5    | 5    | 6    | 4    | 8    | 40   | 5    | 8    | 5    | 10    | 9    | 5    | 5     | 10   | -    | 0.64 | 0.64 | 1.14 | 0.89 | 0.76 | 0.64 | 0.76  | 0.51 |
| 83  | EF1ACPI28 | 4    | 2    | 3    | 2    | 4    | 11   | 1    | 2    | 2    | 3    | 3    | 7    | 37   | 2    | 5    | 2    | 8     | 6    | 2    | 2     | 7    | 5    | -    | 0.25 | 0.76 | 0.51 | 0.38 | 0.25 | 0.38  | 0.38 |
| 84  | EF1ACPI29 | 4    | 2    | 3    | 2    | 4    | 11   | 1    | 2    | 2    | 3    | 3    | 7    | 37   | 2    | 5    | 2    | 8     | 6    | 2    | 2     | 7    | 5    | 2    | -    | 0.76 | 0.51 | 0.38 | 0.25 | 0.38  | 0.38 |
| 85  | EF1ACPI30 | 8    | 6    | 7    | 6    | 8    | 13   | 5    | 6    | 6    | 7    | 7    | 11   | 39   | 6    | 9    | 6    | 6     | 4    | 6    | 6     | 11   | 9    | 6    | 6    | -    | 0.25 | 0.89 | 0.76 | 0.89  | 0.89 |
| 86  | EF1ACPI31 | 6    | 4    | 5    | 4    | 6    | 11   | 3    | 4    | 4    | 5    | 5    | 9    | 37   | 4    | 7    | 4    | 4     | 2    | 4    | 4     | 9    | 7    | 4    | 4    | 2    | -    | 0.64 | 0.51 | 0.64  | 0.64 |
| 87  | EF1ACPI32 | 5    | 3    | 4    | 3    | 5    | 12   | 2    | 3    | 3    | 4    | 4    | 8    | 38   | 3    | 6    | 3    | 9     | 7    | 3    | 3     | 8    | 6    | 3    | 3    | 7    | 5    | -    | 0.38 | 0.51  | 0.51 |
| 88  | EF1ACPI33 | 4    | 2    | 3    | 2    | 4    | 11   | 1    | 2    | 2    | 3    | 3    | 7    | 37   | 2    | 5    | 2    | 8     | 6    | 2    | 2     | 7    | 5    | 2    | 2    | 6    | 4    | 3    | -    | 0.381 | 0.38 |
| 89  | EF1ACPI34 | 5    | 3    | 4    | 3    | 5    | 12   | 2    | 3    | 3    | 4    | 4    | 8    | 38   | 3    | 6    | 3    | 9     | 7    | 3    | 3     | 8    | 6    | 3    | 3    | 7    | 5    | 4    | 3    | -     | 0.51 |
| 90  | EF1ACPI35 | 5    | 3    | 4    | 3    | 5    | 12   | 2    | 3    | 3    | 4    | 4    | 8    | 38   | 3    | 6    | 3    | 9     | 7    | 3    | 3     | 8    | 4    | 3    | 3    | 7    | 5    | 4    | 3    | 4     | -    |
| 91  | EF1ACPI36 | 4    | 2    | 3    | 2    | 4    | 11   | 1    | 2    | 2    | 3    | 3    | 7    | 37   | 2    | 5    | 2    | 8     | 6    | 2    | 2     | 7    | 5    | 2    | 2    | 6    | 4    | 3    | 2    | 3     | 3    |
| 92  | EF1ACPI37 | 6    | 4    | 5    | 4    | 6    | 13   | 3    | 4    | 4    | 5    | 5    | 9    | 39   | 4    | 7    | 4    | 10    | 8    | 4    | 4     | 9    | 7    | 4    | 4    | 8    | 6    | 5    | 4    | 5     | 5    |
| 93  | EF1ACPI38 | 6    | 4    | 5    | 4    | 6    | 13   | 3    | 4    | 4    | 5    | 5    | 9    | 39   | 4    | 7    | 4    | 10    | 8    | 4    | 4     | 9    | 7    | 4    | 4    | 8    | 6    | 5    | 4    | 5     | 5    |
| 94  | EF1ACPI39 | 5    | 3    | 4    | 3    | 5    | 12   | 2    | 3    | 3    | 4    | 4    | 8    | 38   | 3    | 6    | 3    | 9     | 7    | 3    | 3     | 8    | 6    | 3    | 3    | 7    | 5    | 4    | 3    | 4     | 4    |
| 95  | EF1ACPI40 | 9    | 7    | 8    | 7    | 9    | 16   | 6    | 7    | 7    | 8    | 8    | 12   | 42   | 7    | 8    | 7    | 13    | 11   | 7    | 7     | 12   | 10   | 7    | 7    | 11   | 9    | 8    | 7    | 8     | 8    |
| 96  | EF1ACPI41 | 5    | 3    | 4    | 3    | 5    | 12   | 2    | 3    | 3    | 4    | 4    | 8    | 38   | 3    | 6    | 3    | 9     | 7    | 3    | 3     | 8    | 6    | 3    | 3    | 7    | 5    | 4    | 3    | 4     | 4    |
| 97  | EF1ACPI42 | 8    | 6    | 7    | 6    | 8    | 15   | 5    | 6    | 6    | 7    | 7    | 11   | 41   | 6    | 9    | 6    | 12    | 10   | 6    | 6     | 11   | 9    | 6    | 6    | 10   | 8    | 7    | 6    | 7     | 7    |
| 98  | PI1       | 6    | 4    | 5    | 4    | 6    | 13   | 3    | 4    | 4    | 5    | 5    | 9    | 39   | 4    | 7    | 4    | 10    | 8    | 4    | 4     | 9    | 7    | 4    | 4    | 8    | 6    | 5    | 4    | 5     | 5    |
| 99  | PI2       | 8    | 6    | 7    | 6    | 8    | 15   | 5    | 6    | 6    | 7    | 7    | 11   | 41   | 6    | 9    | 6    | 12    | 10   | 6    | 6     | 11   | 9    | 6    | 6    | 10   | 8    | 7    | 6    | 7     | 7    |
| 100 | PI3       | 5    | 3    | 4    | 3    | 5    | 12   | 2    | 3    | 3    | 4    | 4    | 8    | 38   | 3    | 6    | 3    | 9     | 7    | 3    | 3     | 8    | 6    | 3    | 3    | 7    | 5    | 4    | 3    | 4     | 4    |
| 101 | PI4       | 6    | 6    | 7    | 6    | 8    | 14   | 5    | 6    | 6    | 7    | 7    | 11   | 41   | 6    | 9    | 6    | 12    | 10   | 6    | 6     | 11   | 9    | 6    | 6    | 10   | 8    | 7    | 6    | 7     | 7    |
| 102 | PI5       | 6    | 4    | 5    | 4    | 6    | 13   | 3    | 4    | 4    | 5    | 5    | 9    | 39   | 4    | 7    | 4    | 10    | 8    | 3    | 4     | 9    | 7    | 4    | 4    | 8    | 6    | 5    | 4    | 5     | 5    |
| 103 | PI6       | 7    | 5    | 6    | 5    | 7    | 14   | 4    | 5    | 5    | 6    | 6    | 10   | 40   | 5    | 8    | 5    | 11    | 9    | 5    | 5     | 10   | 8    | 5    | 5    | 9    | 7    | 6    | 5    | 6     | 6    |
| 104 | PU1       | 17   | 15   | 16   | 15   | 17   | 11   | 14   | 15   | 15   | 16   | 15   | 20   | 43   | 15   | 18   | 15   | 19    | 17   | 15   | 15    | 20   | 18   | 15   | 15   | 17   | 15   | 16   | 15   | 16    | 16   |
| 105 | PU2       | 19   | 17   | 18   | 17   | 19   | 12   | 16   | 17   | 17   | 18   | 16   | 22   | 46   | 17   | 20   | 17   | 21    | 19   | 17   | 17    | 22   | 20   | 17   | 17   | 19   | 17   | 18   | 17   | 18    | 18   |
| 106 | PU3       | 17   | 15   | 16   | 15   | 17   | 10   | 14   | 15   | 15   | 16   | 14   | 20   | 44   | 15   | 18   | 15   | 19    | 17   | 15   | 15    | 20   | 18   | 15   | 15   | 17   | 15   | 16   | 15   | 16    | 16   |
| 107 | PU4       | 19   | 17   | 18   | 17   | 19   | 12   | 16   | 17   | 17   | 18   | 16   | 22   | 46   | 17   | 20   | 17   | 21    | 19   | 17   | 17    | 22   | 20   | 17   | 17   | 19   | 17   | 18   | 17   | 18    | 18   |
| 108 | PU5       | 17   | 15   | 16   | 15   | 17   | 10   | 14   | 15   | 15   | 16   | 14   | 20   | 44   | 15   | 18   | 15   | 19    | 17   | 15   | 15    | 20   | 18   | 15   | 15   | 17   | 15   | 16   | 15   | 16    | 16   |
| 109 | PU6       | 17   | 15   | 16   | 15   | 17   | 10   | 14   | 15   | 15   | 16   | 14   | 20   | 42   | 15   | 18   | 15   | 19    | 17   | 15   | 15    | 20   | 18   | 15   | 15   | 17   | 15   | 16   | 15   | 16    | 16   |
| 110 | PU7       | 18   | 16   | 17   | 16   | 18   | 11   | 15   | 16   | 16   | 17   | 15   | 21   | 45   | 16   | 19   | 16   | 20    | 18   | 16   | 16    | 21   | 19   | 16   | 16   | 18   | 16   | 17   | 16   | 17    | 17   |

|    |           | 91   | 92   | 93   | 94   | 95   | 96   | 97   | 98   | 99   | 100  | 101  | 102  | 103  | 104  | 105  | 106  | 107  | 108  | 109  | 110  |
|----|-----------|------|------|------|------|------|------|------|------|------|------|------|------|------|------|------|------|------|------|------|------|
| 1  | EF1ACPU01 | 1.65 | 1.90 | 1.90 | 1.78 | 2.28 | 1.78 | 2.16 | 1.90 | 2.16 | 1.78 | 2.03 | 1.65 | 2.03 | 0.64 | 0.51 | 0.25 | 0.51 | 0.25 | 0.51 | 0.64 |
| 2  | EF1ACPU02 | 1.78 | 2.03 | 2.03 | 1.90 | 2.41 | 1.90 | 2.28 | 2.03 | 2.28 | 1.90 | 2.16 | 1.78 | 2.16 | 0.76 | 0.64 | 0.38 | 0.64 | 0.38 | 0.64 | 0.76 |
| 3  | EF1ACPU03 | 1.90 | 2.16 | 2.16 | 2.03 | 2.54 | 2.03 | 2.41 | 2.16 | 2.41 | 2.03 | 2.28 | 1.90 | 2.28 | 0.89 | 0.76 | 0.51 | 0.76 | 0.51 | 0.76 | 0.89 |
| 4  | EF1ACPU04 | 1.78 | 2.03 | 2.03 | 1.90 | 2.41 | 1.90 | 2.28 | 2.03 | 2.28 | 1.90 | 2.16 | 1.78 | 2.16 | 0.76 | 0.64 | 0.38 | 0.64 | 0.38 | 0.64 | 0.76 |
| 5  | EF1ACPU05 | 1.78 | 2.03 | 2.03 | 1.90 | 2.41 | 1.90 | 2.28 | 2.03 | 2.28 | 1.90 | 2.16 | 1.78 | 2.16 | 0.76 | 0.64 | 0.38 | 0.64 | 0.38 | 0.64 | 0.76 |
| 6  | EF1ACPU06 | 2.16 | 2.41 | 2.41 | 2.28 | 2.67 | 2.28 | 2.67 | 2.41 | 2.67 | 2.28 | 2.54 | 2.16 | 2.54 | 0.64 | 1.27 | 1.02 | 1.27 | 1.02 | 1.02 | 1.14 |
| 7  | EF1ACPU07 | 1.90 | 2.16 | 2.16 | 2.03 | 2.54 | 2.03 | 2.41 | 2.16 | 2.41 | 2.03 | 2.28 | 1.90 | 2.28 | 0.64 | 0.76 | 0.51 | 0.76 | 0.51 | 0.76 | 0.89 |
| 8  | EF1ACPU08 | 1.90 | 2.16 | 2.16 | 2.03 | 2.54 | 2.03 | 2.41 | 2.16 | 2.41 | 2.03 | 2.28 | 1.90 | 2.28 | 0.64 | 0.76 | 0.51 | 0.76 | 0.51 | 0.76 | 0.89 |
| 9  | EF1ACPU09 | 2.03 | 2.28 | 2.28 | 2.16 | 2.67 | 2.16 | 2.54 | 2.28 | 2.54 | 2.16 | 2.41 | 2.03 | 2.41 | 0.76 | 0.89 | 0.64 | 0.89 | 0.64 | 0.89 | 1.02 |
| 10 | EF1ACPU10 | 1.78 | 2.03 | 2.03 | 1.90 | 2.41 | 1.90 | 2.28 | 2.03 | 2.28 | 1.90 | 2.16 | 1.78 | 2.16 | 0.76 | 0.64 | 0.38 | 0.64 | 0.38 | 0.64 | 0.76 |
| 11 | EF1ACPU11 | 2.03 | 2.28 | 2.28 | 2.16 | 2.67 | 2.16 | 2.54 | 2.28 | 2.54 | 2.16 | 2.41 | 2.03 | 2.41 | 0.76 | 1.14 | 0.89 | 1.14 | 0.89 | 0.89 | 1.02 |
| 12 | EF1ACPU12 | 2.16 | 2.41 | 2.41 | 2.03 | 2.79 | 2.28 | 2.67 | 2.41 | 2.67 | 2.28 | 2.54 | 2.16 | 2.54 | 1.14 | 1.27 | 1.02 | 1.27 | 1.02 | 1.02 | 1.14 |
| 13 | EF1ACPU13 | 1.78 | 2.03 | 2.03 | 1.90 | 2.41 | 1.90 | 2.28 | 2.03 | 2.28 | 1.90 | 2.16 | 1.78 | 2.16 | 0.76 | 0.64 | 0.38 | 0.64 | 0.38 | 0.64 | 0.76 |
| 14 | EF1ACPU14 | 1.65 | 1.90 | 1.78 | 1.78 | 2.16 | 1.65 | 2.03 | 1.90 | 2.16 | 1.78 | 2.03 | 1.65 | 2.03 | 0.64 | 0.76 | 0.51 | 0.76 | 0.51 | 0.51 | 0.64 |
| 15 | EF1ACPU15 | 1.65 | 1.90 | 1.90 | 1.78 | 2.28 | 1.78 | 2.16 | 1.78 | 2.16 | 1.78 | 2.03 | 1.65 | 2.03 | 0.64 | 0.76 | 0.51 | 0.76 | 0.51 | 0.51 | 0.51 |
| 16 | EF1ACPU16 | 1.78 | 2.03 | 2.03 | 1.90 | 2.41 | 1.90 | 2.28 | 2.03 | 2.28 | 1.90 | 2.16 | 1.78 | 2.16 | 0.76 | 0.64 | 0.38 | 0.64 | 0.38 | 0.64 | 0.76 |
| 17 | EF1ACPU17 | 1.78 | 2.03 | 2.03 | 1.90 | 2.41 | 1.90 | 2.28 | 2.03 | 2.28 | 1.90 | 2.16 | 1.78 | 2.16 | 0.76 | 0.64 | 0.38 | 0.64 | 0.38 | 0.64 | 0.76 |
| 18 | EF1ACPU18 | 1.78 | 2.03 | 2.03 | 1.90 | 2.41 | 1.90 | 2.28 | 2.03 | 2.28 | 1.90 | 2.16 | 1.78 | 2.16 | 0.76 | 0.64 | 0.38 | 0.64 | 0.38 | 0.64 | 0.76 |
| 19 | EF1ACPU19 | 1.65 | 1.90 | 1.90 | 1.78 | 2.28 | 1.78 | 2.16 | 1.90 | 2.16 | 1.78 | 2.03 | 1.65 | 2.03 | 0.64 | 0.76 | 0.51 | 0.76 | 0.51 | 0.51 | 0.64 |
| 20 | EF1ACPU20 | 2.16 | 2.41 | 2.41 | 2.28 | 2.79 | 2.28 | 2.67 | 2.41 | 2.67 | 2.28 | 2.54 | 2.16 | 2.54 | 1.14 | 1.02 | 0.76 | 1.02 | 0.76 | 1.02 | 1.14 |
| 21 | EF1ACPU21 | 2.28 | 2.54 | 2.54 | 2.41 | 2.92 | 2.41 | 2.54 | 2.54 | 2.79 | 2.41 | 2.67 | 2.28 | 2.67 | 1.27 | 1.14 | 0.89 | 1.14 | 0.89 | 1.14 | 1.27 |
| 22 | EF1ACPU22 | 1.78 | 2.03 | 2.03 | 1.90 | 2.41 | 1.90 | 2.28 | 2.03 | 2.28 | 1.90 | 2.16 | 1.78 | 2.16 | 0.76 | 0.64 | 0.38 | 0.64 | 0.38 | 0.64 | 0.76 |
| 23 | EF1ACPU23 | 1.78 | 2.03 | 2.03 | 1.90 | 2.41 | 1.90 | 2.28 | 2.03 | 2.28 | 1.90 | 2.16 | 1.78 | 2.16 | 0.76 | 0.64 | 0.38 | 0.64 | 0.38 | 0.64 | 0.76 |
| 24 | EF1ACPU24 | 2.03 | 2.28 | 2.28 | 2.16 | 2.67 | 2.16 | 2.54 | 2.28 | 2.54 | 2.16 | 2.41 | 2.03 | 2.41 | 1.02 | 0.89 | 0.64 | 0.89 | 0.64 | 0.89 | 1.02 |
| 25 | EF1ACPU25 | 1.78 | 2.03 | 2.03 | 1.90 | 2.41 | 1.90 | 2.28 | 2.03 | 2.28 | 1.90 | 2.16 | 1.78 | 2.16 | 0.76 | 0.64 | 0.38 | 0.64 | 0.38 | 0.64 | 0.76 |
| 26 | EF1ACPU26 | 1.90 | 2.16 | 2.16 | 2.03 | 2.54 | 2.03 | 2.41 | 2.16 | 2.41 | 2.03 | 2.28 | 1.90 | 2.28 | 0.89 | 0.76 | 0.51 | 0.76 | 0.51 | 0.76 | 0.89 |
| 27 | EF1ACPU27 | 1.90 | 2.16 | 2.16 | 2.03 | 2.54 | 2.03 | 2.41 | 2.16 | 2.41 | 2.03 | 2.28 | 1.90 | 2.28 | 0.89 | 0.76 | 0.51 | 0.76 | 0.51 | 0.76 | 0.89 |
| 28 | EF1ACPU28 | 1.90 | 2.16 | 2.16 | 2.03 | 2.54 | 2.03 | 2.41 | 2.16 | 2.41 | 2.03 | 2.28 | 1.90 | 2.28 | 0.89 | 0.76 | 0.51 | 0.76 | 0.51 | 0.76 | 0.89 |
| 29 | EF1ACPU29 | 1.90 | 2.16 | 2.16 | 2.03 | 2.54 | 2.03 | 2.41 | 2.16 | 2.41 | 2.03 | 2.28 | 1.90 | 2.28 | 0.89 | 0.76 | 0.51 | 0.76 | 0.51 | 0.76 | 0.89 |
| 30 | EF1ACPU30 | 1.78 | 2.03 | 2.03 | 1.90 | 2.41 | 1.90 | 2.28 | 2.03 | 2.28 | 1.90 | 2.16 | 1.78 | 2.16 | 0.76 | 0.64 | 0.38 | 0.64 | 0.38 | 0.64 | 0.76 |
| 31 | EF1ACPU31 | 1.90 | 2.16 | 2.16 | 2.03 | 2.54 | 2.03 | 2.41 | 2.16 | 2.41 | 2.03 | 2.28 | 1.90 | 2.28 | 0.89 | 0.76 | 0.51 | 0.76 | 0.51 | 0.76 | 0.89 |
| 32 | EF1ACPU32 | 1.78 | 2.03 | 2.03 | 1.90 | 2.41 | 1.90 | 2.28 | 2.03 | 2.28 | 1.90 | 2.16 | 1.78 | 2.16 | 0.76 | 0.64 | 0.38 | 0.64 | 0.38 | 0.64 | 0.76 |
| 33 | EF1ACPU33 | 1.78 | 2.03 | 2.03 | 1.90 | 2.41 | 1.90 | 2.28 | 2.03 | 2.28 | 1.90 | 2.16 | 1.78 | 2.16 | 1.02 | 0.89 | 0.64 | 0.89 | 0.64 | 0.89 | 1.02 |
| 34 | EF1ACPU34 | 1.90 | 2.16 | 2.16 | 2.03 | 2.54 | 2.03 | 2.41 | 2.16 | 2.41 | 2.03 | 2.28 | 1.90 | 2.28 | 0.89 | 0.76 | 0.51 | 0.76 | 0.51 | 0.76 | 0.89 |
| 35 | EF1ACPU35 | 2.03 | 2.28 | 2.28 | 2.16 | 2.67 | 2.16 | 2.54 | 2.28 | 2.54 | 2.16 | 2.41 | 2.03 | 2.41 | 1.02 | 0.89 | 0.64 | 0.89 | 0.64 | 0.89 | 1.02 |
| 36 | EF1ACPU36 | 2.28 | 2.54 | 2.54 | 2.41 | 2.92 | 2.41 | 2.79 | 2.54 | 2.79 | 2.41 | 2.67 | 2.28 | 2.67 | 1.27 | 1.14 | 0.89 | 1.14 | 0.89 | 1.14 | 1.27 |
| 37 | EF1ACPU37 | 1.78 | 2.03 | 2.03 | 1.90 | 2.41 | 1.90 | 2.28 | 2.03 | 2.28 | 1.90 | 2.16 | 1.78 | 2.16 | 0.76 | 0.64 | 0.38 | 0.64 | 0.38 | 0.64 | 0.76 |
| 38 | EF1ACPU38 | 1.78 | 2.03 | 2.03 | 1.90 | 2.41 | 1.90 | 2.28 | 2.03 | 2.28 | 1.90 | 2.16 | 1.78 | 2.16 | 0.89 | 0.76 | 0.51 | 0.76 | 0.51 | 0.76 | 0.89 |
| 39 | EF1ACPU39 | 2.16 | 2.41 | 2.41 | 2.28 | 2.79 | 2.28 | 2.67 | 2.41 | 2.67 | 2.28 | 2.54 | 2.16 | 2.54 | 1.14 | 1.27 | 1.02 | 1.27 | 1.02 | 0.51 | 1.14 |
| 40 | EF1ACPU40 | 2.28 | 2.54 | 2.54 | 2.41 | 2.92 | 2.41 | 2.79 | 2.54 | 2.79 | 2.41 | 2.67 | 2.16 | 2.67 | 1.27 | 1.40 | 1.14 | 1.40 | 1.14 | 0.64 | 1.27 |
| 41 | EF1ACPU41 | 2.16 | 2.41 | 2.41 | 2.28 | 2.79 | 2.28 | 2.67 | 2.41 | 2.67 | 2.28 | 2.54 | 2.16 | 2.54 | 1.14 | 1.27 | 1.02 | 1.27 | 1.02 | 0.51 | 1.14 |
| 42 | EF1ACPU42 | 2.03 | 2.28 | 2.28 | 2.16 | 2.67 | 2.16 | 2.54 | 2.28 | 2.54 | 2.16 | 2.41 | 2.03 | 2.41 | 1.02 | 0.89 | 0.64 | 0.89 | 0.64 | 0.89 | 1.02 |
| 43 | EF1ACPU43 | 1.65 | 1.90 | 1.90 | 1.78 | 2.28 | 1.78 | 2.16 | 1.90 | 2.16 | 1.78 | 2.03 | 1.65 | 2.03 | 0.64 | 0.76 | 0.51 | 0.76 | 0.51 | 0.51 | 0.38 |
| 44 | EF1ACPU44 | 2.03 | 2.28 | 2.28 | 2.16 | 2.67 | 2.16 | 2.54 | 2.28 | 2.54 | 2.16 | 2.41 | 2.03 | 2.41 | 1.02 | 1.14 | 0.89 | 1.14 | 0.89 | 0.64 | 1.02 |
| 45 | EF1ACPU45 | 1.90 | 2.16 | 2.16 | 2.03 | 2.54 | 2.03 | 2.41 | 2.16 | 2.41 | 2.03 | 2.28 | 1.90 | 2.28 | 0.89 | 1.02 | 0.76 | 1.02 | 0.76 | 0.76 | 0.89 |
| 46 | EF1ACPU46 | 1.78 | 2.03 | 2.03 | 1.90 | 2.41 | 1.90 | 2.28 | 2.03 | 2.28 | 1.90 | 2.16 | 1.78 | 2.16 | 0.76 | 0.89 | 0.64 | 0.89 | 0.64 | 0.64 | 0.76 |
| 47 | EF1ACPU47 | 1.90 | 2.16 | 2.16 | 2.03 | 2.54 | 2.03 | 2.41 | 2.16 | 2.41 | 2.03 | 2.28 | 1.90 | 2.28 | 0.64 | 1.02 | 0.76 | 1.02 | 0.76 | 0.76 | 0.89 |
| 48 | EF1ACPU48 | 2.16 | 2.41 | 2.41 | 2.28 | 2.79 | 2.28 | 2.67 | 2.41 | 2.67 | 2.28 | 2.54 | 2.16 | 2.54 | 1.14 | 1.02 | 0.64 | 1.02 | 0.76 | 1.02 | 1.14 |
| 49 | EF1ACPU49 | 1.65 | 1.90 | 1.90 | 1.78 | 2.28 | 1.78 | 2.16 | 1.90 | 2.16 | 1.78 | 2.03 | 1.65 | 2.03 | 0.64 | 0.76 | 0.51 | 0.76 | 0.51 | 0.51 | 0.64 |
| 50 | EF1ACPU50 | 1.90 | 2.16 | 2.16 | 2.03 | 2.54 | 2.03 | 2.41 | 2.16 | 2.41 | 2.03 | 2.28 | 1.90 | 2.28 | 0.89 | 0.76 | 0.51 | 0.76 | 0.51 | 0.76 | 0.89 |
| 51 | EF1ACPU51 | 1.90 | 2.16 | 2.16 | 2.03 | 2.54 | 2.03 | 2.41 | 2.16 | 2.41 | 2.03 | 2.28 | 1.90 | 2.28 | 0.89 | 1.02 | 0.76 | 1.02 | 0.76 | 0.76 | 0.89 |
| 52 | EF1ACPU52 | 1.78 | 2.03 | 2.03 | 1.90 | 2.41 | 1.90 | 2.28 | 2.03 | 2.28 | 1.90 | 2.16 | 1.78 | 2.16 | 0.76 | 0.89 | 0.64 | 0.89 | 0.64 | 0.64 | 0.76 |
| 53 | EF1ACPU53 | 2.03 | 2.28 | 2.28 | 2.16 | 2.67 | 2.16 | 2.54 | 2.28 | 2.54 | 2.16 | 2.41 | 2.03 | 2.41 | 1.02 | 0.89 | 0.64 | 0.89 | 0.64 | 0.89 | 1.02 |
| 54 | EF1ACPU54 | 1.90 | 2.16 | 2.16 | 2.03 | 2.54 | 2.03 | 2.41 | 2.16 | 2.41 | 2.03 | 2.28 | 1.90 | 2.28 | 0.89 | 0.76 | 0.51 | 0.76 | 0.51 | 0.76 | 0.89 |
| 55 | EF1ACPU55 | 1.78 | 2.03 | 2.03 | 1.90 | 2.41 | 1.90 | 2.28 | 2.03 | 2.28 | 1.90 | 2.16 | 1.78 | 2.16 | 0.76 | 0.64 | 0.38 | 0.64 | 0.38 | 0.64 | 0.76 |
| 56 | EF1ACPI01 | 0.25 | 0.51 | 0.51 | 0.38 | 0.89 | 0.38 | 0.76 | 0.51 | 0.76 | 0.38 | 0.76 | 0.51 | 0.64 | 1.65 | 1.90 | 1.65 | 1.90 | 1.65 | 1.65 | 1.78 |
| 57 | EF1ACPI02 | 0.38 | 0.64 | 0.64 | 0.51 | 1.02 | 0.51 | 0.89 | 0.64 | 0.89 | 0.51 | 0.89 | 0.64 | 0.76 | 1.78 | 2.03 | 1.78 | 2.03 | 1.78 | 1.78 | 1.90 |
| 58 | EF1ACPI03 | 0.38 | 0.64 | 0.64 | 0.51 | 1.02 | 0.51 | 0.89 | 0.64 | 0.89 | 0.51 | 0.89 | 0.64 | 0.76 | 1.78 | 2.03 | 1.78 | 2.03 | 1.78 | 1.78 | 1.90 |
| 59 | EF1ACPI04 | 0.51 | 0.76 | 0.76 | 0.64 | 1.14 | 0.64 | 1.02 | 0.76 | 1.02 | 0.64 | 1.02 | 0.76 | 0.89 | 2.16 | 2.41 | 2.16 | 2.41 | 2.16 | 2.16 | 2.28 |

|     |           |      |      |      |      |      |      |      |      |      |      |      |      |      |       |       |       |      |      |      |      |
|-----|-----------|------|------|------|------|------|------|------|------|------|------|------|------|------|-------|-------|-------|------|------|------|------|
| 60  | EF1ACPI05 | 0.25 | 0.51 | 0.51 | 0.38 | 0.89 | 0.38 | 0.76 | 0.51 | 0.76 | 0.38 | 0.76 | 0.51 | 0.64 | 1.90  | 2.16  | 1.90  | 2.16 | 1.90 | 1.90 | 2.03 |
| 61  | EF1ACPI06 | 0.51 | 0.76 | 0.76 | 0.64 | 1.14 | 0.64 | 1.02 | 0.76 | 1.02 | 0.64 | 0.76 | 0.76 | 0.89 | 2.16  | 2.41  | 2.16  | 2.41 | 2.16 | 2.16 | 2.28 |
| 62  | EF1ACPI07 | 0.25 | 0.51 | 0.51 | 0.38 | 0.89 | 0.38 | 0.76 | 0.51 | 0.76 | 0.38 | 0.76 | 0.51 | 0.64 | 1.90  | 2.16  | 1.90  | 2.16 | 1.90 | 1.90 | 2.03 |
| 63  | EF1ACPI08 | 0.38 | 0.64 | 0.64 | 0.51 | 1.02 | 0.51 | 0.89 | 0.64 | 0.89 | 0.51 | 0.89 | 0.64 | 0.76 | 2.03  | 2.28  | 2.03  | 2.28 | 2.03 | 2.03 | 2.16 |
| 64  | EF1ACPI09 | 0.25 | 0.51 | 0.51 | 0.38 | 0.89 | 0.38 | 0.76 | 0.51 | 0.76 | 0.38 | 0.76 | 0.51 | 0.64 | 1.90  | 2.16  | 1.90  | 2.16 | 1.90 | 1.90 | 2.03 |
| 65  | EF1ACPI10 | 0.51 | 0.76 | 0.76 | 0.64 | 1.14 | 0.64 | 1.02 | 0.76 | 1.02 | 0.64 | 1.02 | 0.76 | 0.89 | 2.16  | 2.41  | 2.16  | 2.41 | 2.16 | 2.16 | 2.28 |
| 66  | EF1ACPI11 | 1.40 | 1.65 | 1.65 | 1.52 | 2.03 | 1.52 | 1.90 | 1.65 | 1.90 | 1.52 | 1.78 | 1.65 | 1.78 | 1.40  | 1.52  | 1.27  | 1.52 | 1.27 | 1.27 | 1.40 |
| 67  | EF1ACPI12 | 0.13 | 0.38 | 0.38 | 0.25 | 0.76 | 0.25 | 0.64 | 0.38 | 0.64 | 0.25 | 0.64 | 0.38 | 0.51 | 1.78  | 2.03  | 1.78  | 2.03 | 1.78 | 1.78 | 1.90 |
| 68  | EF1ACPI13 | 0.25 | 0.51 | 0.51 | 0.38 | 0.89 | 0.38 | 0.76 | 0.51 | 0.76 | 0.38 | 0.76 | 0.51 | 0.64 | 1.90  | 2.16  | 1.90  | 2.16 | 1.90 | 1.90 | 2.03 |
| 69  | EF1ACPI14 | 0.25 | 0.51 | 0.51 | 0.38 | 0.89 | 0.38 | 0.76 | 0.51 | 0.76 | 0.38 | 0.76 | 0.51 | 0.64 | 1.90  | 2.16  | 1.90  | 2.16 | 1.90 | 1.90 | 2.03 |
| 70  | EF1ACPI15 | 0.38 | 0.64 | 0.64 | 0.51 | 1.02 | 0.51 | 0.89 | 0.64 | 0.89 | 0.51 | 0.89 | 0.64 | 0.76 | 2.03  | 2.28  | 2.03  | 2.28 | 2.03 | 2.03 | 2.16 |
| 71  | EF1ACPI16 | 0.38 | 0.64 | 0.64 | 0.51 | 1.02 | 0.51 | 0.89 | 0.64 | 0.89 | 0.51 | 0.89 | 0.64 | 0.76 | 1.90  | 2.03  | 1.78  | 2.03 | 1.78 | 1.78 | 1.90 |
| 72  | EF1ACPI17 | 0.89 | 1.14 | 1.14 | 1.02 | 1.52 | 1.02 | 1.40 | 1.14 | 1.40 | 1.02 | 1.40 | 1.14 | 1.27 | 2.54  | 2.79  | 2.54  | 2.79 | 2.54 | 2.54 | 2.67 |
| 73  | EF1ACPI18 | 4.70 | 4.95 | 4.95 | 4.82 | 5.33 | 4.82 | 5.20 | 4.95 | 5.20 | 4.82 | 5.20 | 4.95 | 5.08 | 5.46  | 5.84  | 5.58  | 5.84 | 5.58 | 5.33 | 5.71 |
| 74  | EF1ACPI19 | 0.25 | 0.51 | 0.51 | 0.38 | 0.89 | 0.38 | 0.76 | 0.51 | 0.76 | 0.38 | 0.76 | 0.51 | 0.64 | 1.90  | 2.16  | 1.90  | 2.16 | 1.90 | 1.90 | 2.03 |
| 75  | EF1ACPI20 | 0.64 | 0.89 | 0.89 | 0.76 | 1.02 | 0.76 | 1.14 | 0.89 | 1.14 | 0.76 | 1.14 | 0.89 | 1.02 | 2.28  | 2.54  | 2.28  | 2.54 | 2.28 | 2.28 | 2.41 |
| 76  | EF1ACPI21 | 0.25 | 0.51 | 0.51 | 0.38 | 0.89 | 0.38 | 0.76 | 0.51 | 0.76 | 0.38 | 0.76 | 0.51 | 0.64 | 1.90  | 2.16  | 1.90  | 2.16 | 1.90 | 1.90 | 2.03 |
| 77  | EF1ACPI22 | 1.02 | 1.27 | 1.27 | 1.14 | 1.65 | 1.14 | 1.52 | 1.27 | 1.52 | 1.14 | 1.52 | 1.27 | 1.40 | 2.41  | 2.67  | 2.41  | 2.67 | 2.41 | 2.41 | 2.54 |
| 78  | EF1ACPI23 | 0.76 | 1.02 | 1.02 | 0.89 | 1.40 | 0.89 | 1.27 | 1.02 | 1.27 | 0.89 | 1.27 | 1.02 | 1.14 | 2.16  | 2.41  | 2.16  | 2.41 | 2.16 | 2.16 | 2.28 |
| 79  | EF1ACPI24 | 0.25 | 0.51 | 0.51 | 0.38 | 0.89 | 0.38 | 0.76 | 0.51 | 0.76 | 0.38 | 0.76 | 0.38 | 0.64 | 1.90  | 2.16  | 1.90  | 2.16 | 1.90 | 1.90 | 2.03 |
| 80  | EF1ACPI25 | 0.25 | 0.51 | 0.51 | 0.38 | 0.89 | 0.38 | 0.76 | 0.51 | 0.76 | 0.38 | 0.76 | 0.51 | 0.64 | 1.90  | 2.16  | 1.90  | 2.16 | 1.90 | 1.90 | 2.03 |
| 81  | EF1ACPI26 | 0.89 | 1.14 | 1.14 | 1.02 | 1.52 | 1.02 | 1.40 | 1.14 | 1.40 | 1.02 | 1.40 | 1.14 | 1.27 | 2.54  | 2.79  | 2.54  | 2.79 | 2.54 | 2.54 | 2.67 |
| 82  | EF1ACPI27 | 0.64 | 0.89 | 0.89 | 0.76 | 1.27 | 0.76 | 1.14 | 0.89 | 1.14 | 0.76 | 1.14 | 0.89 | 1.02 | 2.28  | 2.54  | 2.28  | 2.54 | 2.28 | 2.28 | 2.41 |
| 83  | EF1ACPI28 | 0.25 | 0.51 | 0.51 | 0.38 | 0.89 | 0.38 | 0.76 | 0.51 | 0.76 | 0.38 | 0.76 | 0.51 | 0.64 | 1.90  | 2.16  | 1.90  | 2.16 | 1.90 | 1.90 | 2.03 |
| 84  | EF1ACPI29 | 0.25 | 0.51 | 0.51 | 0.38 | 0.89 | 0.38 | 0.76 | 0.51 | 0.76 | 0.38 | 0.76 | 0.51 | 0.64 | 1.90  | 2.16  | 1.90  | 2.16 | 1.90 | 1.90 | 2.03 |
| 85  | EF1ACPI30 | 0.76 | 1.02 | 1.02 | 0.89 | 1.40 | 0.89 | 1.27 | 1.02 | 1.27 | 0.89 | 1.27 | 1.02 | 1.14 | 2.16  | 2.41  | 2.16  | 2.41 | 2.16 | 2.16 | 2.28 |
| 86  | EF1ACPI31 | 0.51 | 0.76 | 0.76 | 0.64 | 1.14 | 0.64 | 1.02 | 0.76 | 1.02 | 0.64 | 1.02 | 0.76 | 0.89 | 1.90  | 2.16  | 1.90  | 2.16 | 1.90 | 1.90 | 2.03 |
| 87  | EF1ACPI32 | 0.38 | 0.64 | 0.64 | 0.51 | 1.02 | 0.51 | 0.89 | 0.64 | 0.89 | 0.51 | 0.89 | 0.64 | 0.76 | 2.03  | 2.28  | 2.03  | 2.28 | 2.03 | 2.03 | 2.16 |
| 88  | EF1ACPI33 | 0.25 | 0.51 | 0.51 | 0.38 | 0.89 | 0.38 | 0.76 | 0.51 | 0.76 | 0.38 | 0.76 | 0.51 | 0.64 | 1.90  | 2.16  | 1.90  | 2.16 | 1.90 | 1.90 | 2.03 |
| 89  | EF1ACPI34 | 0.38 | 0.64 | 0.64 | 0.51 | 1.02 | 0.51 | 0.89 | 0.64 | 0.89 | 0.51 | 0.89 | 0.64 | 0.76 | 2.03  | 2.28  | 2.03  | 2.28 | 2.03 | 2.03 | 2.16 |
| 90  | EF1ACPI35 | 0.38 | 0.64 | 0.64 | 0.51 | 1.02 | 0.51 | 0.89 | 0.64 | 0.89 | 0.51 | 0.89 | 0.64 | 0.76 | 2.03  | 2.28  | 2.03  | 2.28 | 2.03 | 2.03 | 2.16 |
| 91  | EF1ACPI36 | -    | 0.51 | 0.51 | 0.38 | 0.89 | 0.38 | 0.76 | 0.51 | 0.76 | 0.38 | 0.76 | 0.51 | 0.64 | 1.90  | 2.16  | 1.90  | 2.16 | 1.90 | 1.90 | 2.03 |
| 92  | EF1ACPI37 | 4    | -    | 0.76 | 0.64 | 1.14 | 0.64 | 1.02 | 0.76 | 1.02 | 0.64 | 1.02 | 0.76 | 0.89 | 2.16  | 2.41  | 2.16  | 2.41 | 2.16 | 2.16 | 2.28 |
| 93  | EF1ACPI38 | 4    | 6    | -    | 0.64 | 0.89 | 0.38 | 0.76 | 0.76 | 1.02 | 0.64 | 1.02 | 0.76 | 0.76 | 2.16  | 2.41  | 2.16  | 2.41 | 2.16 | 2.16 | 2.28 |
| 94  | EF1ACPI39 | 3    | 5    | 5    | -    | 1.02 | 0.51 | 0.89 | 0.64 | 0.89 | 0.51 | 0.89 | 0.64 | 0.76 | 2.03  | 2.28  | 2.03  | 2.28 | 2.03 | 2.03 | 2.16 |
| 95  | EF1ACPI40 | 7    | 9    | 7    | 8    | -    | 0.76 | 1.14 | 1.14 | 1.40 | 1.02 | 1.40 | 1.14 | 1.27 | 2.54  | 2.79  | 2.54  | 2.79 | 2.41 | 2.54 | 2.67 |
| 96  | EF1ACPI41 | 3    | 5    | 3    | 4    | 6    | -    | 0.64 | 0.64 | 0.89 | 0.51 | 0.89 | 0.64 | 0.76 | 2.03  | 2.28  | 2.03  | 2.28 | 2.03 | 2.03 | 2.16 |
| 97  | EF1ACPI42 | 6    | 8    | 6    | 7    | 9    | 5    | -    | 1.02 | 1.27 | 0.89 | 1.27 | 1.02 | 1.14 | 2.41  | 2.67  | 2.41  | 2.67 | 2.41 | 2.41 | 2.54 |
| 98  | PI1       | 4    | 6    | 6    | 5    | 9    | 5    | 8    | -    | 1.02 | 0.64 | 1.02 | 0.76 | 0.89 | 2.16  | 2.41  | 2.16  | 2.41 | 2.16 | 1.90 | 2.03 |
| 99  | PI2       | 6    | 8    | 8    | 7    | 11   | 7    | 10   | 8    | -    | 0.89 | 1.27 | 1.02 | 1.14 | 2.41  | 2.54  | 2.41  | 2.67 | 2.41 | 2.41 | 2.54 |
| 100 | PI3       | 3    | 5    | 5    | 4    | 8    | 4    | 7    | 5    | 7    | -    | 0.89 | 0.64 | 0.76 | 2.03  | 2.28  | 2.03  | 2.28 | 2.03 | 2.03 | 2.16 |
| 101 | PI4       | 6    | 8    | 8    | 7    | 11   | 7    | 10   | 8    | 10   | 7    | -    | 1.02 | 1.14 | 2.284 | 2.54  | 2.284 | 2.54 | 2.28 | 2.28 | 2.41 |
| 102 | PI5       | 4    | 6    | 6    | 5    | 9    | 5    | 8    | 6    | 8    | 5    | 8    | -    | 0.89 | 1.90  | 2.157 | 1.90  | 2.16 | 1.90 | 1.90 | 2.03 |
| 103 | PI6       | 5    | 7    | 6    | 6    | 10   | 6    | 9    | 7    | 9    | 6    | 9    | 7    | -    | 2.28  | 2.54  | 2.28  | 2.54 | 2.28 | 2.28 | 2.41 |
| 104 | PU1       | 15   | 17   | 17   | 16   | 20   | 16   | 19   | 17   | 19   | 16   | 18   | 15   | 18   | -     | 1.14  | 0.89  | 1.14 | 0.89 | 0.89 | 1.02 |
| 105 | PU2       | 17   | 19   | 19   | 18   | 22   | 18   | 21   | 19   | 20   | 18   | 20   | 17   | 20   | 9     | -     | 0.76  | 1.02 | 0.76 | 1.02 | 1.14 |
| 106 | PU3       | 15   | 17   | 17   | 16   | 20   | 16   | 19   | 17   | 19   | 16   | 18   | 15   | 18   | 7     | 6     | -     | 0.76 | 0.51 | 0.76 | 0.89 |
| 107 | PU4       | 17   | 19   | 19   | 18   | 22   | 18   | 21   | 19   | 21   | 18   | 20   | 17   | 20   | 9     | 8     | 6     | -    | 0.76 | 1.02 | 1.14 |
| 108 | PU5       | 15   | 17   | 17   | 16   | 19   | 16   | 19   | 17   | 19   | 16   | 18   | 15   | 18   | 7     | 6     | 4     | 6    | -    | 0.76 | 0.89 |
| 109 | PU6       | 15   | 17   | 17   | 16   | 20   | 16   | 19   | 15   | 19   | 16   | 18   | 15   | 18   | 7     | 8     | 6     | 8    | 6    | -    | 0.89 |
| 110 | PU7       | 16   | 18   | 18   | 17   | 21   | 17   | 20   | 16   | 20   | 17   | 19   | 16   | 19   | 8     | 9     | 7     | 9    | 7    | 7    | -    |

Numbers above the diagonal indicate percent distance values; numbers below the diagonal indicate absolute distance values. *C. punctiferalis*, EF1ACPU01–EF1ACPU55 and PU1–PU7; *C. pinicolalis*, EF1ACPI01–EF1ACPI42 and PI1–PI6.
