# Supplementary figures and images for: Morphological, Ecological, and Molecular Divergence of Conogethes pinicolalis from C. punctiferalis (Lepidoptera: Crambidae)
Source: MDPI journal article supplement (doi:10.3390/insects12050455), 2021-05-15

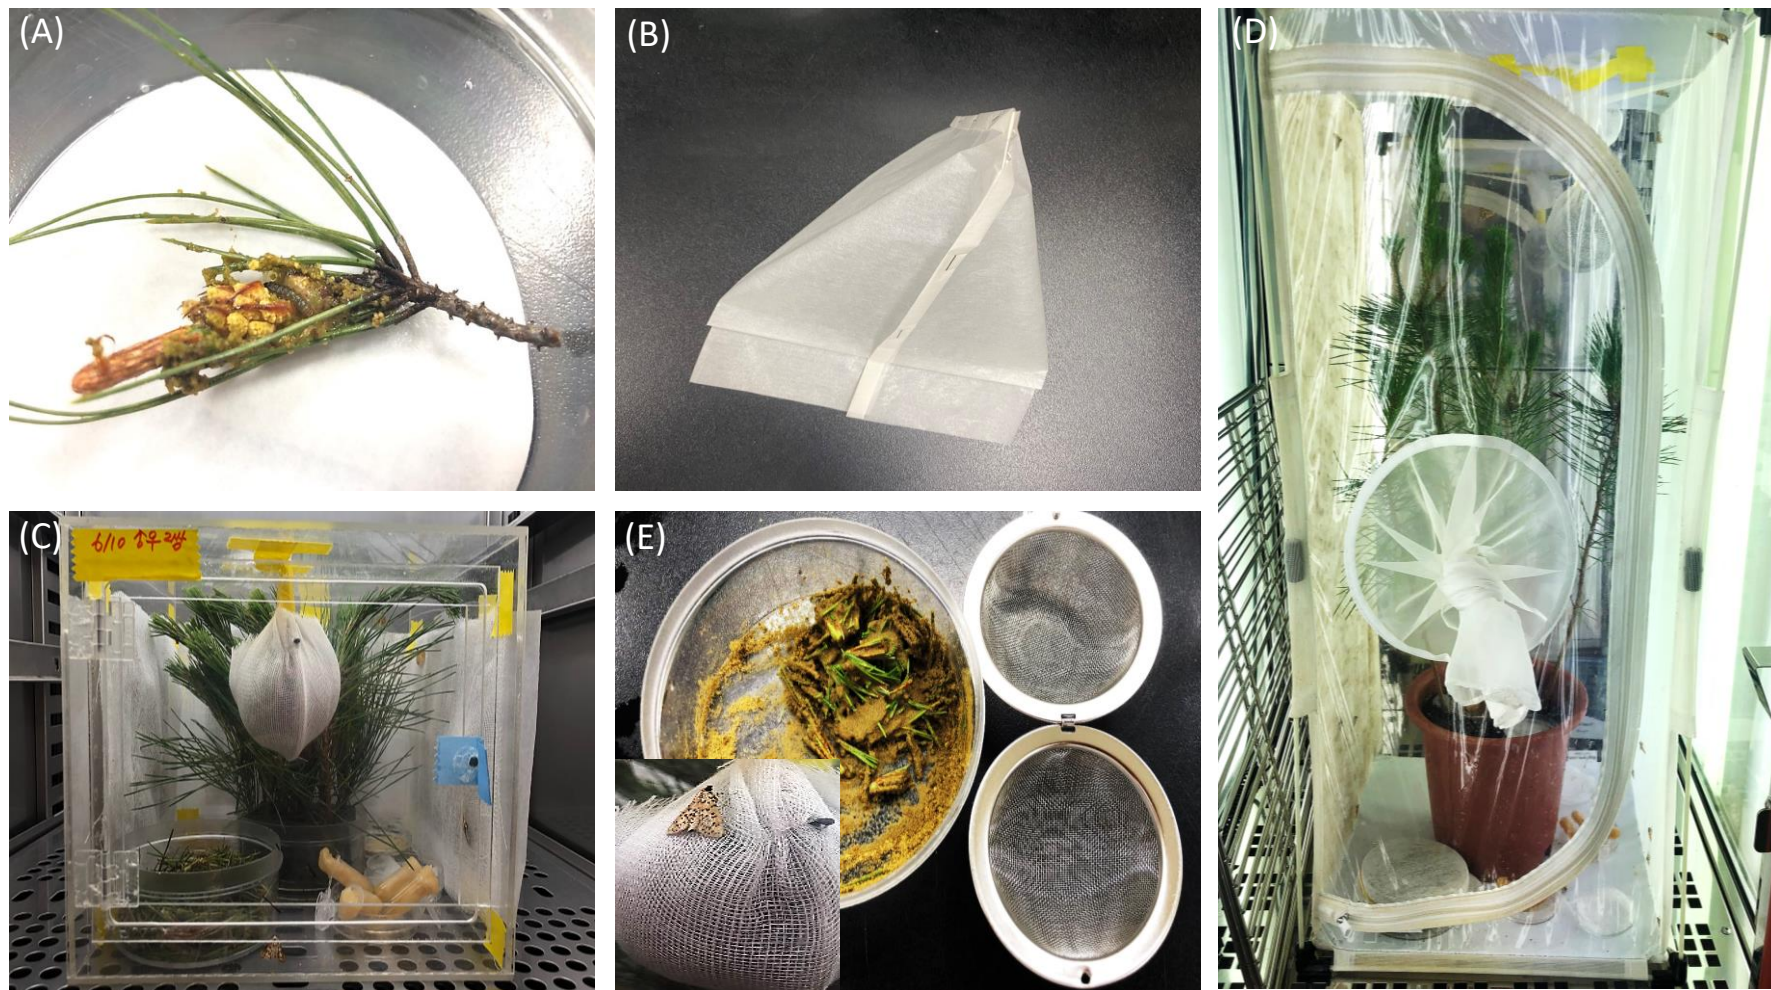

**Figure S1.**

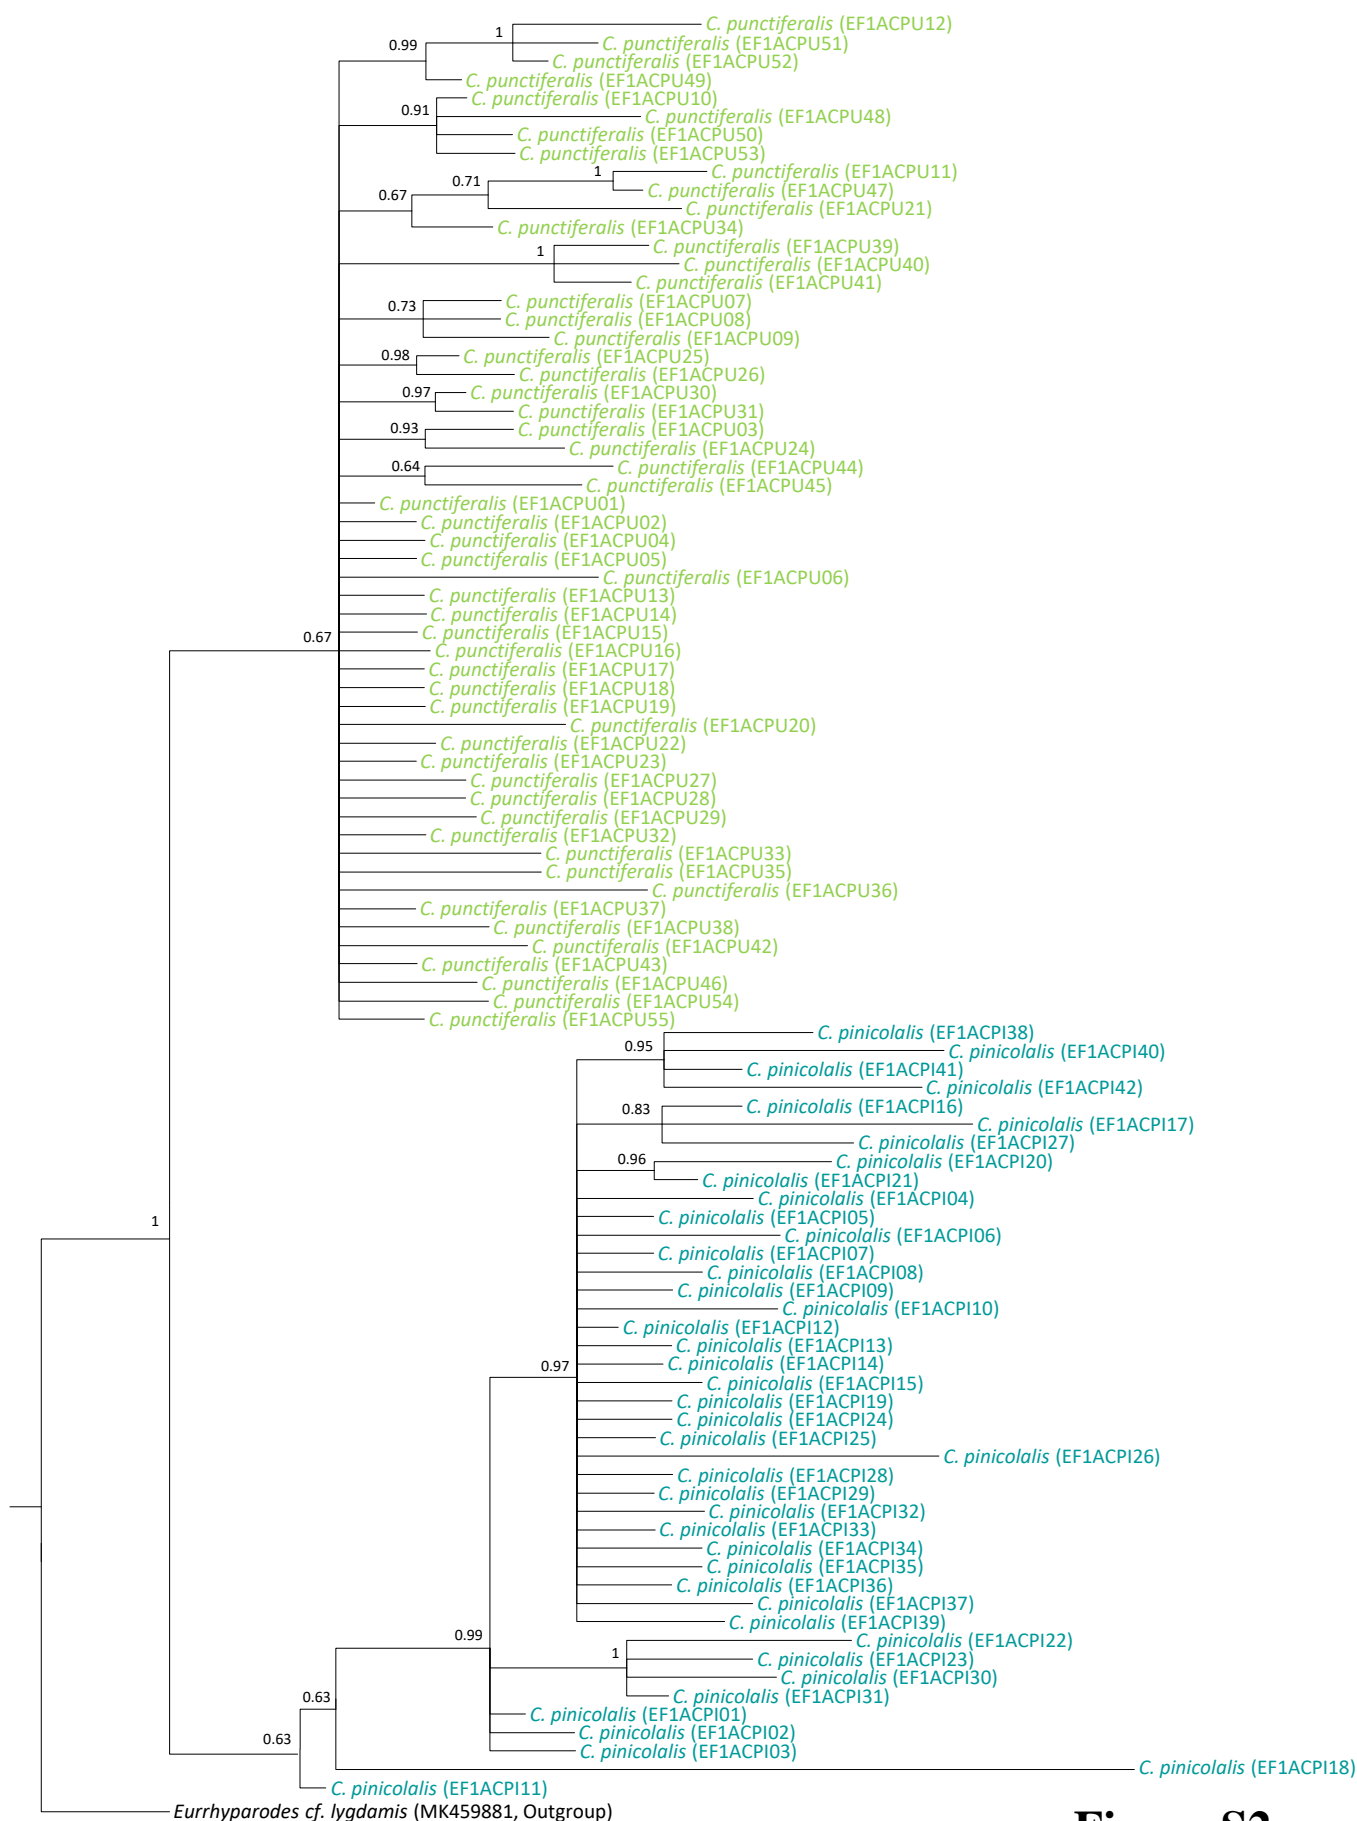

**Figure S2.**

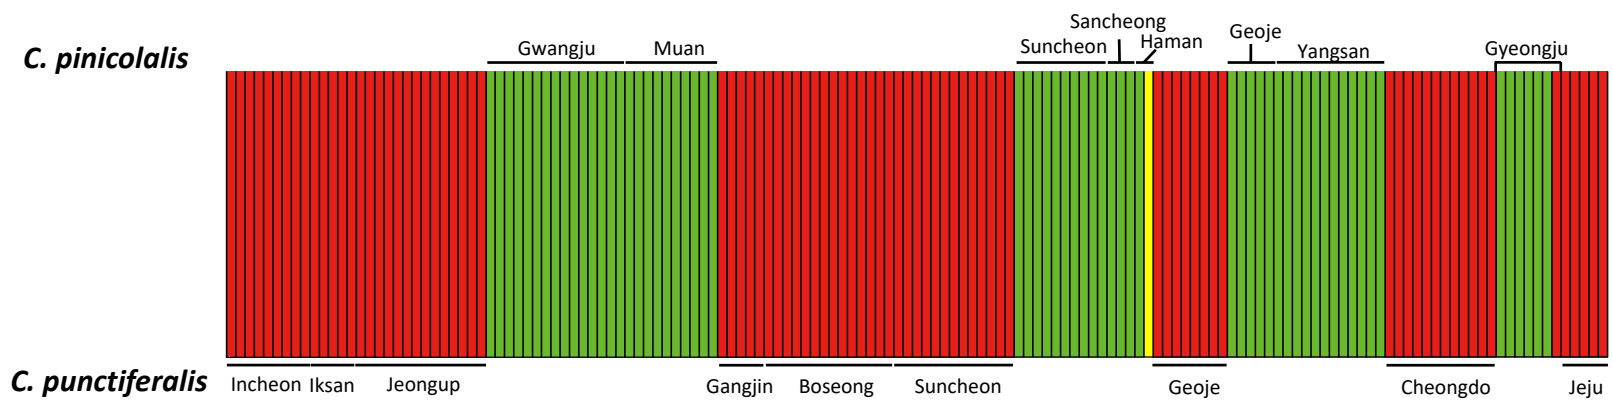

**Figure S3.**

Supplement: s1 [file s1]
